# Supplementary material for: “Women Are Better Than Men”–Public Beliefs on Gender Differences and Other Aspects in Multitasking
Source: PLoS One. 2015 Oct 19;10(10):e0140371. doi: 10.1371/journal.pone.0140371 (PMC4610696; doi:10.1371/journal.pone.0140371)
Supplement: S1 Table — The three datasets excluded due to obvious fake answers are not included due to the use of strong language in open comments textboxes. They are available on request from the authors. (XLSX) [file pone.0140371.s001.xlsx]

## Sheet: Raw
Raw!$B$3:$Ef$1000																											280							290	208
	Country	I have read the Research Participant Information Sheet	I have had an opportunity to contact the researchers to ask questions and discuss the study	I have had an opportunity to contact the researchers to ask questions and discuss the study	I understand my participation is voluntary and I am free to withdraw from the study: - at any time (Please note that you will unable to withdraw once your data has been included in any reports, publications etc.) - without having to give a reason for withdrawing - without it affecting my future care	I agree to take part in this study	What is your gender?	what is your age?		Where is your place of birth?	Where is your place of birth?	Where is your place of birth? - Other (please specify)	If you were not born in the UK, how many years have you lived in the UK? - Open-Ended Response	Where do you live now? (only if different to place of birth)	Only if current country of residence is different to place of birth: For how many years did you live in the country you are living in now? - Open-Ended Response	Which of the following best describes your current relationship status?			How many children do you have? - Open-Ended Response	What is your current occupation? (please specify your job title) - Open-Ended Response	What is the highest degree or level of education you have completed?	What is the highest degree or level of education you have completed?	What is the highest degree or level of education you have completed?		How good do you think you are at multitasking? -	How many hours a day do you spend multitasking?	Do you think there are gender differences in multitasking?	Why do you think men and women do not differ on multitasking? - Open-Ended Response	Do you think Specific types of people are better at multitasking?	Do you think Specific types of people are better at multitasking? - If yes please explain/specify	What makes a person good at multitasking? - Open-Ended Response	Do you think they (the type of person in previous question) are better at specific types of multitasking?	Do you think they (the type of person in previous question) are better at specific types of multitasking? - If yes please explain/specify	Who do you think is better at multitasking?	Why do you think they are better? - Open-Ended Response	Do you believe gender differences in multitasking depend on the number of tasks at hand?	Do you believe gender differences in multitasking depend on the number of tasks at hand? - If yes please explain/specify	Do you think women are better due to childcare? For example having to attend to children’s needs as well as other household tasks.	Why do you think women are better than men at multitasking? - Open-Ended Response	Do you think only certain types of women are better?	Do you think only certain types of women are better? - If yes please explain/specify	Do you think women who don’t have children are also better at multitasking (e.g. because they have a genetic / evolutionary advantage)?	Do you think women without children are not better than men (e.g. because they haven’t had the multitasking training)?	Do you think only certain types of women are better?	Do you think only certain types of women are better? - If yes please explain/specify	Why do you think they are better? - Open-Ended Response	Do you believe gender differences in multitasking depend on the number of tasks at hand?	Do you believe gender differences in multitasking depend on the number of tasks at hand? - If yes please explain/specify	Do you think men are better at multitasking due to their jobs and working environments? For example answering phone calls, responding to emails and doing paperwork.
Dataset	Country	Consent1	Consent2	Consent3	Consent4	ConsentAgree	Gender	Age	Age2	Birthplace	Group	Birthplace_Other	LivedInUK	Current_residence	HowLongCurrentResidence	Relationship	Relationship2	Relationship3	Children	Occupation	Education	Education2	Education3	Education4	OwnMTAbilities	HoursMTperDay	GenderDiff	WhyGenderDiff	SpecialPeopleBetterAtMT	SpecialPeopleBetterAtMT_OC	WhatMakesGoodMTasker	BetterAtSpecTypesOfMT	BetterAtSpecTypesOfMT_OC	WhoIsBetter	WhyGenderBetter_OC	GD_NoOfTasks	GD_NoOfTasks_OC	WomenBetterChildcare	WhyWomenBetter_OC	CertainTypesWomenBetter	CertainTypesWomenBetter_OC	WomenWithoutChildrenStillBetter	WomenWithoutChildrenNOTBetter	Do you think only certain types of women are better?	CertainTypesOfWomenBetter	CertainTypesOfWomenBetter_OC	GenderDiffNoOfTasks	GenderDiffNoOfTasks_OC	MenBetterBCofJobs
1	UK	yes	yes		yes	yes	Female	26-35	<=35	UK	UK					Married	Married/Partnership	Married/Partnership	0	Accountant	Graduate or professional degree	Graduate or professional degree	Higher Education	Higher Education	Good	2015-05-07	Yes							Women	We are able to focus on more than one thing at a time, a lot of Men don't seem to be able to	No		Yes	Broader views of day to day tasks	No
2	UK	yes	no	No
3	UK	no	no
4	UK	yes	no	No
5	UK	yes	yes		yes	yes	Male	36-45	>35	UK	UK					Single	Single	Single	0	none	Associate's degree	Associate's degree	Non-Higher Education	Non-Higher Education	Average	2015-02-04	Yes							Women
6	UK	yes	yes		yes	yes	Male	56-65	>35	UK	UK					In a domestic partnership or civil union	Married/Partnership	Married/Partnership	2	human factors engineer	Graduate or professional degree	Graduate or professional degree	Higher Education	Higher Education	Average	2015-02-04	No	I can at first thought think of no argument from evolutionary psychology why this might be so.	Yes	Possibly those with a little better short-term memory	Use of job-aids to support context-switching
7	UK	yes	no	Yes	yes	yes	Female	26-35	<=35	Other	UK	Ghana	25			Single	Single	Single	0	Destination support specialist	Some college, no degree	Some college, no degree	Non-Higher Education	Non-Higher Education	Very good	10	Yes							Women	They have more responsbilities as a gender, so naturally better	No		Yes	N/a	No
8	UK	yes	yes		yes	yes	Male	26-35	<=35	UK	UK					Divorced	Divorced	Married/Partnership	0	lift engineer	Some college, no degree	Some college, no degree	Non-Higher Education	Non-Higher Education	Good	2015-02-04	No	I don't think it is gender specific however women seem to take on more tasks.	No			No
9	UK	yes	yes		yes	yes	Female	18-25	<=35	UK	UK					In a domestic partnership or civil union	Married/Partnership	Married/Partnership	0	pharmacist	High school graduate (includes equivalency)	High School	Non-Higher Education	Non-Higher Education	Very good	10	Yes							Women	generally women think about things that need to be done while doing something else all the time. Where as men concentrate on the situation at hand.	No		No				Yes	No	No
10	UK	yes	yes		no	no
11	UK	yes	yes		yes	yes	Female	18-25	<=35	Other	UK	Jamaica	15			Single, never married	Single	Single	0	Student	Some college, no degree	Some college, no degree	Non-Higher Education	Higher Education	Good	2015-02-04	Yes							Women	they have more experience - e.g. childcare duties, household duties and work duties completed almost simultaneously	No		Yes	reason stated previously	No
12	UK	yes	yes		yes	yes	Female	18-25	<=35	UK	UK					Single	Single	Single	0	in education, currently studying for a undergraduate degree in sociology	High school graduate (includes equivalency)	High School	Non-Higher Education	Non-Higher Education	Good	2015-05-07	Yes							Women	Women are just able to do a million different things at a time, such as looking after the children, cooking dinner making sure the house is in order. Whereas i think men have a less of an attention span and would just sit in front of the TV all day watching football if we let them, however I may be being bias as a woman myself.	No		Yes	Women have just got it in them to do a million different things at once, i honestly believe it is just the way we as women are built, were incredibly special.	No
13	UK	yes	no	Yes	yes	yes
14	UK	yes	no	Yes	yes	yes	Female	18-25	<=35	UK	UK					Single, never married	Single	Single	0	Student	Bachelor's degree	Bachelor's degree	Non-Higher Education	Higher Education	Very good	2015-02-04	Yes							Women	In my experience women are, e.g. I know I'm better at it than my boyfriend! Also generally accepted in society that women are better	Yes	Women able to handle more tasks at once	Yes	I think we're just wired differently	No
15	UK	no	yes
16	UK	yes	yes		yes	yes	Female	18-25	<=35	UK	UK					Single, never married	Single	Single	0		Some college, no degree	Some college, no degree	Non-Higher Education	Non-Higher Education	Average	2015-02-04	No	I can't think how they would differ...	Yes	People of higher intelligence would probably be best at multi tasking.	Efficiently being able to complete more than one task within a given time.
17	UK	yes	yes		yes	yes	Female	18-25	<=35	UK	UK					Single	Single	Single	0	student	Less than high school	Less than high school	Non-Higher Education	Higher Education	Good	2015-02-04	Yes							Women	They have to juggle family, work, and housekeeping whereas men don't tend to do this.	No		Yes	Childcare etc	Yes	Some are naturally more able to multitask. Women who are maybe dyspraxic would struggle multitasking for example
18	UK	yes	no	No
19	UK	yes	yes		yes	yes	Male	18-25	<=35	UK	UK					Single	Single	Single		Full time education	High school graduate (includes equivalency)	High School	Non-Higher Education	Non-Higher Education	Average	2015-02-04	No	Because on a daily basis, I see no evidence for a difference between genders in their ability to multi task	Yes	Because of individual differences, some people are more practiced due to their occupation, hobbies etc.	Being able to carry out multiple tasks at once. The better they are, the more tasks there can be and they can be specifically more complex.
20	UK	yes	yes		yes	yes	Female	18-25	<=35	UK	UK					In a domestic partnership or civil union	Married/Partnership	Married/Partnership		Student	Graduate or professional degree	Graduate or professional degree	Higher Education	Higher Education	Good	2015-02-04	Yes							Women
21	UK	yes	yes		yes	yes	Male	46-55	>35	Other	UK	Morocco	42			Married	Married/Partnership	Married/Partnership	3	Company Director	Some college, no degree	Some college, no degree	Non-Higher Education	Non-Higher Education	Good	1	No	I think we are born with different abilities regardless of gender and multitasking is one of these abilities	No			No
22	UK	yes	yes		yes	yes	Female	18-25	<=35	UK	UK					Single	Single	Single	0	Work assisting in a vets	High school graduate (includes equivalency)	High School	Non-Higher Education	Non-Higher Education	Good	2015-05-07	No	Men have their own equally capable abilities as do women, I don't think we can always assume one is definitely more capable then the other :)	Yes	Some peoples education status may allow them to do more educationally challenging forms of multitasking then others, ie a hard maths question while they're listening to music at the same time, age differences also may restrict how well others are at multitasking :)	Their strength and ability to carry out skill related tasks, how organised a person is to do multiple tasks at one time without losing concentration, how determined a person is to carry out numerous tasks, how agile a person can be and in cases their intelligence can contribute to how well they can carry out multiple tasks at one time.
23	UK	yes	yes		yes	yes	Female	36-45	>35	UK	UK					Married	Married/Partnership	Married/Partnership	0	Not working . Medical reasons	Some college, no degree	Some college, no degree	Non-Higher Education	Non-Higher Education	Poor	0	Yes							Women	Research suggests	No		Yes	Just the way their brains have developed	No
24	UK	yes	yes		yes	yes	Male	26-35	<=35	UK	UK					In a domestic partnership or civil union	Married/Partnership	Married/Partnership	0	Research Scientist	Ph.D.	Ph.D.	Higher Education	Higher Education	Average	0	No	Multi-tasking is a misnomer, it is rather a case of task switching, and efficiency of task switching. Some people are better than others, but to say it is gender-specific is a sweeping statement.	Yes	kinda, see above.	Practice
25	UK	yes	yes		yes	yes	Male	36-45	>35	UK	UK					In a domestic partnership or civil union	Married/Partnership	Married/Partnership	1	Director	Bachelor's degree	Bachelor's degree	Non-Higher Education	Non-Higher Education	Average	0	No
26	UK	yes	yes		yes	yes	Female	18-25	<=35	UK	UK					Single, never married	Single	Single	0	Student	High school graduate (includes equivalency)	High School	Non-Higher Education	Non-Higher Education	Very good	2015-05-07	Yes							Women	Women pay more attention to certain things and have the ability to split their attention	No		Yes
27	UK	no	no
28	UK	yes	yes		yes	yes	Female	36-45	>35	UK	UK					Married	Married/Partnership	Married/Partnership	3	reporter	Bachelor's degree	Bachelor's degree	Non-Higher Education	Non-Higher Education	Good	2015-05-07	Yes							Women	It seems to come naturally to women.	No		Yes	I'm used to being surrounded by my kids all wanting something and talking to me at the same time, so I have to be able to react and respond.	Yes	Mothers! See above.
29	UK	yes	yes		yes	yes	Female	26-35	<=35	Other	UK	Ireland	18			Married	Married/Partnership	Married/Partnership	1	Staff Nurse	Bachelor's degree	Bachelor's degree	Non-Higher Education	Non-Higher Education	Average	2015-08-10	Yes							Women	They're more likely to need to multitask in order to get things done and so will (generalising hugely here) have more practise. Anyone of either gender who multitasks on a regular basis will naturally be better at multitasking than someone who doesn't.	No	I think it depends on the nature of the tasks	No				No	No	No
30	UK	yes	yes		yes	yes	Female	26-35	<=35	UK	UK					Married	Married/Partnership	Married/Partnership	1	stay at home mum	Bachelor's degree	Bachelor's degree	Non-Higher Education	Non-Higher Education	Good	2015-08-10	No	Personality is a stronger factor than gender.	Yes	Very organised people can work out tasks that compliment each other.	Ability to stay calm and adapt.
31	UK	no	no
32	UK	yes	yes		yes	yes	Male	18-25	<=35	Other	Other	China				Single, never married	Single	Single	0	student	Graduate or professional degree	Graduate or professional degree	Higher Education	Higher Education	Good	2015-02-04	Yes							Men												men are normally better at logical thinking, and therefore capable of carrying more than one task in a rational and logical way to ensure both quality and efficiency	No		Yes
33	UK	yes	no	Yes	yes	yes	Female	18-25	<=35	Other	Other	Indonesia	0			Single, never married	Single	Single	0	Student	Less than high school	Less than high school	Non-Higher Education	Higher Education	Good	2015-05-07	Yes							Women	They can focus on many things at the same time.	No		Yes	They can focus many things at the same time	Yes	Not every women can do that
34	UK	yes	yes		yes	yes	Female	18-25	<=35	UK	UK					Single, never married	Single	Single	0	Full time student	Bachelor's degree	Bachelor's degree	Non-Higher Education	Non-Higher Education	Good	2015-05-07	No
35	UK	yes	yes		yes	yes
36	UK	yes	no	No
37	UK	yes	yes		yes	yes	Female	36-45	>35	UK	UK					Married	Married/Partnership	Married/Partnership	4	Stay at home mum	High school graduate (includes equivalency)	High School	Non-Higher Education	Non-Higher Education	Excellent	2015-05-07	Yes							Women	Because women are more focused on what they are doing	No		Yes
38	UK	yes	yes		yes	yes	Female	36-45	>35	UK	UK					Married	Married/Partnership	Married/Partnership	2	Dental,nurse	Some college, no degree	Some college, no degree	Non-Higher Education	Non-Higher Education	Very good	2015-08-10	Yes							Women	Because we have to be	Yes		No				Yes	No	Yes
39	UK	yes	yes		yes	yes	Female	18-25	<=35	UK	UK					In a domestic partnership or civil union	Married/Partnership	Married/Partnership	2	na	Some college, no degree	Some college, no degree	Non-Higher Education	Non-Higher Education	Good	10	Yes							Men												Men dont seem to risk assess as much as women so multitask alot easier as they are blissfully unaware of the problems which could possibly occur, even if its not likely.	No		No
40	UK	yes	no	Yes	no	yes
41	UK	yes	yes		yes	yes	Female	18-25	<=35	UK	UK									Student	Some college, no degree	Some college, no degree	Non-Higher Education	Higher Education	Good	2015-02-04	Yes							Women	Brain differences	No		No				Yes	No	No
42	UK	yes	yes		yes	yes
43	UK	yes	yes		yes	yes	Female	18-25	<=35	Other	UK	China	10years			Single	Single	Single	0	student	Graduate or professional degree	Graduate or professional degree	Higher Education	Higher Education	Average	2015-02-04	No	i dont really think gender matters, really is different person tend to do better on multitasking. as well there isnt really any data to support whichever gender is better on multitaking.	No			No		Women	mens tend to focus on one things all the time, where women
44	UK	yes	yes		yes	yes	Female	26-35	<=35	UK	UK					Married	Married/Partnership	Married/Partnership	2	Doctor	Graduate or professional degree	Graduate or professional degree	Higher Education	Higher Education	Very good	10	Yes							Women	In today's society woman are forced to multitask more often so I think that they are better in general as they get more practice!	No		Yes	More practice. Necessity	No
45	UK	yes	no	Yes	yes	yes
46	UK	no	no
47	UK	no	yes
48	UK	yes	yes		yes	yes	Male	36-45	>35	UK	UK					Divorced	Divorced	Married/Partnership	0	customer service	Some college, no degree	Some college, no degree	Non-Higher Education	Non-Higher Education	Very good	10	Yes							Men												observations	No		No
49	UK	no	no
50	UK	yes	no	No
51	UK	no	no
52	UK	yes	yes		yes	yes	Male	26-35	<=35	UK	UK					Single, never married	Single	Single	0	Vertical cylindrical structural gyratory operative	Some college, no degree	Some college, no degree	Non-Higher Education	Non-Higher Education	Excellent	10	No	It is not gender specific, it is down to the individual	Yes	Multitasking is all about brain capacity and personality, not gender roles.	Someone who can do more than one thing at once, forgetful people are generally not.
53	UK	yes	yes		yes	yes	Male	26-35	<=35	UK	UK					Married	Married/Partnership	Married/Partnership	0	Teacher	Graduate or professional degree	Graduate or professional degree	Higher Education	Higher Education	Extremely bad	0	Yes							Women
54	UK	no	no
55	UK	yes	no	No
56	UK	yes	yes		yes	yes	Male	26-35	<=35	UK	UK					Divorced	Divorced	Married/Partnership	1	Unemployed	Some college, no degree	Some college, no degree	Non-Higher Education	Non-Higher Education	Average	2015-02-04	Yes							Women	Not sure	No		Yes	Not sure	No
57	UK	yes	yes		yes	yes
58	UK	yes	yes		yes	yes
59	UK	no	no
60	UK	yes	yes		yes	yes	Male	46-55	>35	UK	UK					Divorced	Divorced	Married/Partnership	0	Gardener	High school graduate (includes equivalency)	High School	Non-Higher Education	Non-Higher Education	Average	0	No
61	UK	yes	no	Yes	yes	yes	Male	26-35	<=35	UK	UK					Single, never married	Single	Single			Bachelor's degree	Bachelor's degree	Non-Higher Education	Non-Higher Education	Very good	1	No
62	UK	no	no
63	UK	yes	yes		yes	yes	Male	46-55	>35	UK	UK					In a domestic partnership or civil union	Married/Partnership	Married/Partnership	3	builder	Bachelor's degree	Bachelor's degree	Non-Higher Education	Non-Higher Education	Excellent	2015-02-04	No	Varies depending on individual	Yes	People who undertake many responsibilities often have to multitask. Lazy folk do not attempt as many tasks	A lively mind and ambition
64	UK	yes	yes		yes	yes	Female	18-25	<=35	UK	UK					Single, never married	Single	Single		student	Some college, no degree	Some college, no degree	Non-Higher Education	Higher Education	Poor	1	Yes							Women	I don't know. They just appear to do jobs that require multitasking.	No		Yes	I thought I err explained this.	Yes	I'm not
65	UK	yes	no	Yes	yes	yes
66	UK	yes	yes		yes	yes	Male	26-35	<=35	UK	UK					In a domestic partnership or civil union	Married/Partnership	Married/Partnership	0	Researcher	Graduate or professional degree	Graduate or professional degree	Higher Education	Higher Education	Average	2015-02-04	Yes							Women	Just from experience. My partner of seven years is a multi-tasking machine; as is my mother. Most of my male family and friends are, by comparison, useless.	No		Yes	I think the childrearing point is a good one. I also think that the culturally embedded nature of superior female multitasking has a part to play.	No
67	UK	yes	yes		yes	yes	Female	26-35	<=35	UK	UK					Separated	Divorced	Married/Partnership	2	Carer	Bachelor's degree	Bachelor's degree	Non-Higher Education	Non-Higher Education	Good	2015-05-07	Yes							Women	Women can do more tasks than men, often making dinner, looking after kids, talking on the phone whilst doing these tasks	No		Yes	My ex could only ever doing one thing at a time, while I could do 3-4 task, whilst looking after 2 small children	No
68	UK	yes	yes		yes	yes	Female	18-25	<=35	UK	UK					Single	Single	Single			High school graduate (includes equivalency)	High School	Non-Higher Education	Non-Higher Education	Very good	2015-02-04	No
69	UK	yes	yes		yes	yes	Male	26-35	<=35	UK	UK		34			Single	Single	Single	0	teacher	Some college, no degree	Some college, no degree	Non-Higher Education	Non-Higher Education	Excellent	2015-02-04	Yes							Women	I heard they are		No option for don't know	Yes	I heard they are	No	Don't know
70	UK	no	yes
71	UK	yes	yes		yes	yes	Male	36-45	>35	UK	UK					Married	Married/Partnership	Married/Partnership	2	Laboratory Manager	Bachelor's degree	Bachelor's degree	Non-Higher Education	Non-Higher Education	Good	2015-05-07	No	We are all capable some just get on and do others feel the need air their abilities as better.	No	I see all types of people able to multitask		No	Ability to do and willingness to do so
72	UK	yes	yes		yes	yes	Male	36-45	>35	UK	UK					In a domestic partnership or civil union	Married/Partnership	Married/Partnership	3	Process Optimiser	Some college, no degree	Some college, no degree	Non-Higher Education	Non-Higher Education	Very good	2015-05-07	No	Not gender defined	Yes	If they are experienced in a certain occupation specifically dealing with people	Experience and organisation
73	UK	yes	yes		yes	yes	Male	36-45	>35	UK	UK					Married	Married/Partnership	Married/Partnership	3	operations director	Graduate or professional degree	Graduate or professional degree	Higher Education	Higher Education	Very good	2015-08-10	No	Both as capable as each other, although men park cars better	Yes	Educated, professional, carers,nursing staff,	Organised, structured, calm,
74	UK	yes	yes		yes	yes	Male	56-65	>35	UK	UK					Married	Married/Partnership	Married/Partnership	2	Technical Author	High school graduate (includes equivalency)	High School	Non-Higher Education	Non-Higher Education	Poor	2015-02-04	Yes							Women	Brain wired differently	No		Yes	Brain wired diferently	No
75	UK	yes	no	Yes	yes	yes	Male	36-45	>35	UK	UK					In a domestic partnership or civil union	Married/Partnership	Married/Partnership	0	unemployed	Less than high school	Less than high school	Non-Higher Education	Non-Higher Education	Very Poor	1	No	Because i don't believe any specific gender can multitask efficiently	Yes	People who can sing and play a musical instrument at the same time	Concentration
76	UK	yes	no	Yes	yes	yes	Male	46-55	>35	UK	UK					Married	Married/Partnership	Married/Partnership	3	director	Graduate or professional degree	Graduate or professional degree	Higher Education	Higher Education	Poor	2015-02-04	No	I think women will try to multitask more often because they believe they are good at it but I believe that multitasking invariably leads to inefficient and incomplete work regardless of sex.	Yes	I suspect some very intelligent and disciplined people may be able to focus on more than one thing at once and see them through to high quality and efficient completion. But for most people concentrating on one thing at a time will overall deliver better quality and faster throughput of work.	Intelligence and disciplined execution.
77	UK	yes	yes		yes	yes	Male	18-25	<=35	UK	UK					In a domestic partnership or civil union	Married/Partnership	Married/Partnership	0	Coffee Consultant	Bachelor's degree	Bachelor's degree	Non-Higher Education	Non-Higher Education	Good	2015-08-10	No	I believe that biology is the driver of human characteristics, and that it affects us all in the way we carry out tasks, but gender is the result of biology, and not a driver of abiities in itself.	No			No
78	UK	yes	yes		yes	yes	Male	46-55	>35	UK	UK					Married	Married/Partnership	Married/Partnership	2	Head of IT	Some college, no degree	Some college, no degree	Non-Higher Education	Non-Higher Education	Average	2015-02-04	No	I don't see a pattern	No			No
79	UK	yes	yes
80	UK	no	no
81	UK	yes	yes		yes	yes	Female	26-35	<=35	Other	Other	Ireland	0			Single, never married	Single	Single	0	Lecturer	Ph.D.	Ph.D.	Higher Education	Higher Education	Good	2015-02-04	No	I have no evidence that they differ so I won't make that assumption	Yes	maybe people who are calmer as the multitasking doesn't make them flustered	not being prone to stress
82	UK	yes	yes		yes	yes	Male	18-25	<=35	UK	UK					Single, never married	Single	Single	0	Student	Some college, no degree	Some college, no degree	Non-Higher Education	Higher Education	Good	2015-02-04	Yes							Women	Women in general throughout life may be exposed to many situations that require multi-tasking/organisation Secretaries and nurses for instance are regarded as female professions and include a great deal of multitasking.	No		Yes	Occupational, cognitive and biological (i.e: child maternity) differences.	No
83	UK	yes	yes		yes	yes	Male	36-45	>35	UK	UK					Married	Married/Partnership	Married/Partnership	1	Asset Management - Finance Executive	Some college, no degree	Some college, no degree	Non-Higher Education	Non-Higher Education	Average	2015-02-04	Yes							Women	More concentration	No		Yes	More concentration	No
84	UK	yes	no	Yes	yes	yes	Female	18-25	<=35	UK	UK					Single, never married	Single	Single	0	student	Some college, no degree	Some college, no degree	Non-Higher Education	Higher Education	Good	2015-02-04	No	people say that men are worse at multitasking but there are also women who are bad at multitasking, i have never been provided with any other evidence to support either argument.	Yes	Everyone has different talents, some people may just be really good at multitasking and others not so much, although I don't believe there is an exact type who are better than the rest.	I'm not sure. It could be learned behaviour or genetic.
85	UK	yes	no	No
86	UK	yes	yes		yes	yes	Female	18-25	<=35	UK	UK					Single	Single	Single	1	Full Time Student	Some college, no degree	Some college, no degree	Non-Higher Education	Non-Higher Education	Good	2015-05-07	No	I do not believe gender has anything to do with it, I believe that stereotype happens because woman tend to be in caring roles within the family and caring roles require a huge amount of multitasking, but men in this position would also do well with multitasking	No			No
87	UK	yes	yes		yes	yes	Female	26-35	<=35	UK	UK					Single	Single	Single	0	sales	Some college, no degree	Some college, no degree	Non-Higher Education	Non-Higher Education	Average	2015-02-04	Yes							Women	we generally do more to get things done quickley	No		Yes	we want to get on and prove ourselves in society	Yes	older because when your young you are carefree
88	UK	yes	yes		yes	yes	Male	18-25	<=35	UK	UK					Single	Single	Single	0	Exam Marker	Bachelor's degree	Bachelor's degree	Non-Higher Education	Non-Higher Education	Good	2015-05-07	No	.	Yes	people with good focus are better	The ability to do more than one thing at the same without the quality of their work suffering
89	UK	yes	yes		yes	yes	Male	18-25	<=35	Other	Other	Hong Kong	3 years 3 months			Single	Single	Single	0	Student	Some college, no degree	Some college, no degree	Non-Higher Education	Higher Education	Poor	1	Yes							Women	Instinct. I think their attention would be more distributed.	Yes	Maybe different gender have different optimal number of tasks that they multitask better	Yes	I think women might take part in more dives activities compared to men	No
90	UK	yes	yes		yes	yes	Male	over 65	>35	UK	UK					Married	Married/Partnership	Married/Partnership	2	PARKING ATTENDANT SUPERVISOR	High school graduate (includes equivalency)	High School	Non-Higher Education	Non-Higher Education	Very good	2015-05-07	No	Beacsue they are equally capable	Yes	Bright people	Brains
91	UK	yes	no	Yes	yes	yes	Female	18-25	<=35	Other	Other	Poland	6			Married	Married/Partnership	Married/Partnership	2	Full time mum (carrier of disabled child)	Some college, no degree	Some college, no degree	Non-Higher Education	Non-Higher Education	Very good	2015-08-10	Yes							Women	No man I ever met was able of multitasking, 2 tasks at once were at most and with not very good results.	No	As above.	Yes	I can see it. It's simple fact.	No	Most of them are, expecially mothers.
92	UK	yes	yes		yes	yes	Female	56-65	>35	UK	UK					Married	Married/Partnership	Married/Partnership	2	Teacher	Some college, no degree	Some college, no degree	Non-Higher Education	Non-Higher Education	Good	2015-05-07	No
93	UK	yes	no	Yes	yes	yes	Male	18-25	<=35	UK	UK					Single, never married	Single	Single	0	Student.	Some college, no degree	Some college, no degree	Non-Higher Education	Non-Higher Education	Average	1	Yes							Women	I always see females around me excel at multitasking, whilst I generally don't see any males do two things at once.	No	If someone is a strong multitask-er, I believe that they can do any number of things (within reason), regardless of gender.	No				Yes	No	No
94	UK	no	yes		yes	yes
95	UK	yes	yes		yes	yes	Female	26-35	<=35	UK	UK					Single, never married	Single	Single		unemployed	Bachelor's degree	Bachelor's degree	Non-Higher Education	Non-Higher Education	Good	2015-02-04	Yes							Women	I believe often women have more opportunities of multi tasking. Many men are in single task employment	No		Yes	woman have more reason for multi tasking	Yes	I think like everyone there are set people who find things easy and set people who do not
96	UK	yes	no	Yes	yes	yes
97	UK	yes	yes		yes	yes	Female	36-45	>35	UK	UK					Married	Married/Partnership	Married/Partnership	2	Hr manager	Graduate or professional degree	Graduate or professional degree	Higher Education	Higher Education	Very good	10	Yes							Women
98	UK	yes	yes		yes	yes	Female	36-45	>35	Other	Other	USA				Married	Married/Partnership	Married/Partnership	2	Instructor of English	Bachelor's degree	Bachelor's degree	Non-Higher Education	Non-Higher Education	Very Poor	2015-08-10	No	I've never seen research to the contrary.	Yes	Those who are naturally organized	Good connections in the brain
99	UK	yes	yes		yes	yes	Female	18-25	<=35	UK	UK					In a domestic partnership or civil union	Married/Partnership	Married/Partnership	1	Bookkeeper	Some college, no degree	Some college, no degree	Non-Higher Education	Non-Higher Education	Good	2015-02-04	Yes							Women	Women have to be better generally as mostly they juggle childcare with working and maintaining a home	No		Yes	Because they spend the most time perfecting it!	Yes	Working mothers would generally do more multitasking than a single woman living alone I would say
100	UK	yes	yes		yes	yes	Female	18-25	<=35	Other	Other	Ireland	1			Married	Married/Partnership	Married/Partnership	1	homemaker	Some college, no degree	Some college, no degree	Non-Higher Education	Non-Higher Education	Average	2015-08-10	Yes							Women
101	UK	yes	yes		yes	yes	Male	18-25	<=35	Other	Other	Switzerland	1			Single, never married	Single	Single	0	Student	Graduate or professional degree	Graduate or professional degree	Higher Education	Higher Education	Good	2015-02-04	No	it's just a stereotype and maybe the stereotype threat makes people behave according to the expectations	Yes	extroverted people; they seem to do it more often.	being able to split their attention without performing much worse than just focusing their attention on one thing
102	UK	yes	yes		yes	yes	Female	26-35	<=35	UK	UK					Married	Married/Partnership	Married/Partnership	0	Administrator	High school graduate (includes equivalency)	High School	Non-Higher Education	Non-Higher Education	Very good	2015-05-07	No	its down to Individual ability, not gender	No			No
103	UK	no	no	No
104	UK	yes	yes		yes	yes	Male	36-45	>35	UK	UK					Separated	Divorced	Married/Partnership		DEPARTMENT SUPERVISOR	Less than high school	Less than high school	Non-Higher Education	Non-Higher Education	Average	2015-05-07	No	because we are all the same its what we are trained to do	No			No
105	UK	yes	yes		yes	yes	Female	18-25	<=35	UK	UK					In a domestic partnership or civil union	Married/Partnership	Married/Partnership	0	student	High school graduate (includes equivalency)	High School	Non-Higher Education	Higher Education	Average	2015-02-04	Yes							Women	Direct experience	No		Yes	I think men can procrastinate and get distracted more easily	No
106	UK	yes	no	No
107	UK	yes	yes		yes	yes	Female	46-55	>35	Other	UK	Bulgaria	13			Married	Married/Partnership	Married/Partnership	2	HR Administrator	Bachelor's degree	Bachelor's degree	Non-Higher Education	Non-Higher Education	Excellent	2015-02-04	No	Multitasking is a quality of the individual's brain and does not depend of the gender.	No	People who multitask have better concentration, focus,ability to listen and act at the same time, very good memory.		Yes
108	UK	yes	no		yes	yes
109	UK	yes	yes		yes	yes	Female	26-35	<=35	UK	UK					Married	Married/Partnership	Married/Partnership		Administrator	High school graduate (includes equivalency)	High School	Non-Higher Education	Non-Higher Education	Very good	2015-05-07	No	Multitasking is based on the individual, sex is irrelevant	Yes
110	UK	yes	yes		yes	yes	Male	36-45	>35	UK	UK					Married	Married/Partnership	Married/Partnership	2	Small Tools Manager	Associate's degree	Associate's degree	Non-Higher Education	Non-Higher Education	Excellent	2015-05-07	No	each to there own abilities.	Yes		the ability to think and be proactive.
111	UK	yes	yes		yes	yes	Female	18-25	<=35	UK	UK					Single, never married	Single	Single	0	Student	Bachelor's degree	Bachelor's degree	Non-Higher Education	Higher Education	Good	2015-02-04	Yes							Women	Able to prioritise and focus on several tasks at once	Yes		No				No	Yes	Yes
112	UK	yes	no		yes	yes
113	UK	yes	yes		yes	yes	Female	18-25	<=35	Other	Other	Bulgaria	4.5			Single, never married	Single	Single	0	Performance Analyst	Bachelor's degree	Bachelor's degree	Non-Higher Education	Non-Higher Education	Very good	2015-05-07	Yes							Women	Personal experience	Yes		Yes
114	UK	yes	yes		yes	yes	Male	18-25	<=35	UK	UK					Single, never married	Single	Single	0	Tutor	Bachelor's degree	Bachelor's degree	Non-Higher Education	Non-Higher Education	Very good	2015-05-07	Yes							Men												They tend to work in a more mechanical fashion and as such it is easier to swap between tasks and maintain efficiency.	No	The larger the number of tasks the more it becomes more about fluidity rather than mechanics. Females tend to multitask better in larger environments.	No
115	UK	yes	yes		yes	yes	Male	46-55	>35	UK	UK					Separated	Divorced	Married/Partnership	2	Unit Manager in a Builder Merchant	High school graduate (includes equivalency)	High School	Non-Higher Education	Non-Higher Education	Good	2015-02-04	No	I believe it depends more on the person rather than their sex and the women better than men at multi-tasking is just an Urban Myth	No	Generally (but not specifically) more mature and calmer people.		Yes
116	UK	yes	no		yes	yes
117	UK	yes	yes		yes	yes	Female	18-25	<=35	Other	Other	Romania	4			Single, never married	Single	Single	0	Student	High school graduate (includes equivalency)	High School	Non-Higher Education	Non-Higher Education	Good	2015-05-07	Yes							Women	First of all, parenting develops multitasking abilities, and at a global level, women are still statistically the primary care giver in terms of parental relationships. Generally men are more fidgety, have shorter attention spans.	No	If there's less tasks at hand, the difference would not be as noticeable	No				No	Yes	Yes
118	UK	yes	yes		yes	yes	Male	18-25	<=35	Other	UK	Qatar	12			Single	Single	Single	0	student	High school graduate (includes equivalency)	High School	Non-Higher Education	Higher Education	Very good	2015-08-10	No	Because a job can be done just as efficiently by one or the other	No	A person with hand-eye co-ordination can multi-task with a physical activity and another mental activity as compared to somebody who's mental prowess allows them to mentally multi-task two or more things.		No	A person with hand-eye co-ordination can multi-task with a physical activity and another mental activity as compared to somebody who's mental prowess allows them to mentally multi-task two or more things.
119	UK	yes	yes		yes	yes	Female	18-25	<=35	UK	UK					Married	Married/Partnership	Married/Partnership	0		Some college, no degree	Some college, no degree	Non-Higher Education	Non-Higher Education	Excellent	2015-08-10	Yes							Women	Handbags	Yes		No				No	Yes	Yes
120	UK	yes	no		yes	yes
121	UK	yes	no		yes	yes
122	UK	yes	yes		yes	yes	Female	18-25	<=35	Other	UK	Bulgaria	13 years			Single	Single	Single	0	University Student	Some college, no degree	Some college, no degree	Non-Higher Education	Non-Higher Education	Good	2015-08-10	Yes							Women	My own personal experience suggests that women are better at multi-tasking than men. Also, there's a general social trend as to this view.	Yes		No				No	Yes	No	It is likely that there are individual differences between the female gender itself. For example, those who are higher in the professional ladder are more likely to be better at multi-tasking because of experience and the requirements of the job itself.
123	UK	yes	yes		yes	yes	Female	46-55	>35	UK	UK					Married	Married/Partnership	Married/Partnership	2		Less than high school	Less than high school	Non-Higher Education	Non-Higher Education	Very Poor	2015-05-07	Yes							Women	they dont get so stressed	Yes		No				Yes	No	No	they need to be stable
124	UK	yes	yes		yes	yes	Male	46-55	>35	Other	UK	Jamaica	38YRS			In a domestic partnership or civil union	Married/Partnership	Married/Partnership	3	ENGINEER	Associate's degree	Associate's degree	Non-Higher Education	Non-Higher Education	Average	2015-05-07	Yes							Women	they just seem to be doing more than one thing at a time most of the time	No	the job, house work, the children and all there different activities + there needs + their partners needs etc. and most men don`t see themselves as the home maker if they did they would have to multitask	No				No	Yes	No	some women don`t use their abilities because they rely on the man for everything then when they split up they find it difficult to cope with everyday tasks
125	UK	yes	yes		yes	yes	Female	18-25	<=35	UK	UK					Single, never married	Single	Single	0	Support Worker	Some college, no degree	Some college, no degree	Non-Higher Education	Non-Higher Education	Good	2015-02-04	Yes							Women
126	UK	yes	yes		yes	yes	Female	18-25	<=35	Other	Other	Romania	1			Single, never married	Single	Single	0	Sales Agent	Bachelor's degree	Bachelor's degree	Non-Higher Education	Non-Higher Education	Average	2015-02-04	No	Mutitasking relates to perception of the surrounding environment. It's based in the amount of attantion one needs to pay in order to understand and comply.	Yes		Attention distribution
127	UK	yes	yes		yes	yes	Female	36-45	>35	UK	UK					Married	Married/Partnership	Married/Partnership	0	supervisor	Some college, no degree	Some college, no degree	Non-Higher Education	Non-Higher Education	Very good	2015-08-10	Yes							Women	they think things through better and logically.	Yes		Yes	they plan better think logically and systematically	Yes
128	UK	yes	yes		yes	yes	Male	26-35	<=35	UK	UK					Married	Married/Partnership	Married/Partnership	3	loss Prevention analysis	Some college, no degree	Some college, no degree	Non-Higher Education	Non-Higher Education	Very good	2015-05-07	Yes							Men												I think a lot of men work well under pressure	Yes		No
129	UK	yes	yes		yes	yes	Female	18-25	<=35	UK	UK					Single	Single	Single	0	unemployed	Bachelor's degree	Bachelor's degree	Non-Higher Education	Non-Higher Education	Average	2015-02-04	No	some do but generally gender doesn't make a difference.	No	parents and students mostly (from personal experience)		No
130	UK	yes	yes		yes	yes	Male	46-55	>35	Other	UK	Morocco	43 years			Married	Married/Partnership	Married/Partnership	2	WORKSHOP MANAGER	Some college, no degree	Some college, no degree	Non-Higher Education	Non-Higher Education	Good	2015-08-10	No	I don’t think it’s down to gender but more to do with the environment you are brought up in.	Yes		Able to deal with more than one thing at a time..
131	UK	yes	yes		yes	yes
132	UK	yes	yes		yes	yes	Male	18-25	<=35	UK	UK					Single	Single	Single	0	Unemployed	Less than high school	Less than high school	Non-Higher Education	Non-Higher Education	Average	2015-02-04	No	I don't believe that gender influences it as there are equally demanding tasks for both men and women	No	People who are much busier than others seem to multitask better than those who have the time to do one task at a time		No	A busy person may have to juggle a working life and taking care of their children, for instance. However, they may not be able to do other sorts of multitasking
133	UK	yes	yes		yes	yes	Female	18-25	<=35	UK	UK					Single, never married	Single	Single	0	student	Some college, no degree	Some college, no degree	Non-Higher Education	Higher Education	Very good	2015-05-07	No	Not to do with gender, but rather individual differences. Some men may be good and some may be bad, and its the same with women	No	people who are very focused and driven, high achievers, people who need to multitask in order to be on track		Yes
134	UK	yes	yes		yes	yes
135	UK	yes	yes		yes	yes	Female	26-35	<=35	UK	UK					Married	Married/Partnership	Married/Partnership	1	Studio Manager	Graduate or professional degree	Graduate or professional degree	Higher Education	Higher Education	Average	2015-02-04	Yes							Women	It's likely that, of women with children, they are the main caregiver therefor are always parenting alongside any other tasks.	Yes		No				Yes	Yes	Yes
136	UK	yes	yes		yes	yes	Male	26-35	<=35	UK	UK					Divorced	Divorced	Married/Partnership	2	Business development manager	Bachelor's degree	Bachelor's degree	Non-Higher Education	Non-Higher Education	Good	2015-02-04	No	Because its an awareness think, we can all do it if there is enough awareness, however some people choose to split there attention whereas others do not, for most they are not aware enough that they have a choice and therein lies the problem.	No	People that are more aware, conscious and have done more work in this area		Yes
137	UK	yes	yes		yes	yes	Female	36-45	>35	UK	UK					Separated	Divorced	Married/Partnership	3	Admin	Some college, no degree	Some college, no degree	Non-Higher Education	Non-Higher Education	Very good	10	Yes							Women	Men's mind focus on one task, whilst women can cope with more	Yes		No				No	Yes	No	I think it also is to do with personality too
138	UK	yes	yes		yes	yes	Female	26-35	<=35	UK	UK					In a domestic partnership or civil union	Married/Partnership	Married/Partnership	0	Marketing Assistant	High school graduate (includes equivalency)	High School	Non-Higher Education	Non-Higher Education	Good	2015-05-07	Yes							Women	Women are more organised then men! They can handle pressure.	No	Sometimes men get frustrated and give up on one, where a women would carry on until task complete.	No				No	Yes	Yes	I think it depends on the individual
139	UK	yes	yes		yes	yes	Male	46-55	>35	UK	UK					In a domestic partnership or civil union	Married/Partnership	Married/Partnership		admin / store trainer	Some college, no degree	Some college, no degree	Non-Higher Education	Non-Higher Education	Good	2015-02-04	Yes							Women	Just think they are a lot calmer when doing things.	Yes		Yes	Men rush a lot of jobs they do.	Yes
140	UK	yes	no		yes	yes
141	UK	no	no		yes	no
142	UK	yes	no		yes	yes
143	UK	yes	yes		yes	yes	Female	26-35	<=35	UK	UK					Single, never married	Single	Single	0	Sky Academy Studios Leader	Bachelor's degree	Bachelor's degree	Non-Higher Education	Non-Higher Education	Very good	2015-08-10	Yes							Women	From observation, men are least able to concentrate on multiple things at once and complete the tasks effectively. Men also admit they are not great at mutitasking. The fact women tend to be better could be due to raising children whilst keeping a house and working, so they develop these skills throughout life. But this is just a theory.	Yes		No				No	Yes	Yes
144	UK	yes	yes		yes	yes	Female	18-25	<=35	UK	UK					Married	Married/Partnership	Married/Partnership	1	Stay at home Mum	High school graduate (includes equivalency)	High School	Non-Higher Education	Non-Higher Education	Very good	2015-05-07	No	Men are just as capable as women when they want to be	Yes		Being able to do things well
145	UK	yes	yes		yes	yes	Female	18-25	<=35	UK	UK					Single	Single	Single	0	Student	High school graduate (includes equivalency)	High School	Non-Higher Education	Higher Education	Good	2015-05-07	Yes							Women	Because woman have the ability to see things differently to men	Yes		No				Yes	Yes	Yes
146	UK	yes	yes		yes	yes	Male	18-25	<=35	UK	UK					Single	Single	Single	0	sales	High school graduate (includes equivalency)	High School	Non-Higher Education	Non-Higher Education	Good	2015-02-04	No	i think some men and some women are good at multitasking.I don't think it has anything to do with gender.	No	I think it can depend on your type of job.		No	if they have to do multitasking everyday i think they will be better at it.
147	UK	yes	yes		yes	yes	Male	18-25	<=35	UK	UK					Single, never married	Single	Single	0	Student	High school graduate (includes equivalency)	High School	Non-Higher Education	Higher Education	Average	1	Yes							Women	Difference in how the brain is wired which nobody yet understands - but to say that both genders are equally good at all things seems to be just burying your head in the sand.	No		Yes	Different brain structure.	Yes
148	UK	yes	yes		yes	yes	Female	26-35	<=35	UK	UK					Single	Single	Single	0	Student	Graduate or professional degree	Graduate or professional degree	Higher Education	Higher Education	Very good	2015-05-07	Yes							Women	They can concentrate on more than one thing at once - i.e., being able to hold a conversation whilst engaging in other activities, which males seem unable to do	Yes		Yes	same answer as before	No	There will be variations - I think the majority of women vs men will be better however
149	UK	yes	yes		yes	yes	Female	18-25	<=35	UK	UK					Single	Single	Single	0	Student	Some college, no degree	Some college, no degree	Non-Higher Education	Higher Education	Good	2015-05-07	No	Depends more on the individual and their personality rather than their gender. Also each gender may multitask in different ways.	No	Creative people I feel would find multitasking easier than highly logical people. Mothers or those with hectic jobs must multitask daily and so would be better at it.		No	For example, someone in business may be ableto take a phone call, deal with a client and check a database all at once, whereas a mother may be more likely to be cooking a meal andsoothing a baby whilst keeping an eye on a toddler.
150	UK	yes	no		yes	yes
151	UK	yes	yes		yes	yes	Male	36-45	>35	UK	UK					Married	Married/Partnership	Married/Partnership	1	New Build Sales Manager	High school graduate (includes equivalency)	High School	Non-Higher Education	Non-Higher Education	Average	2015-05-07	Yes							Women	From the people I have worked with, women have always been better at Multitasking. I believe it to be a better attention to detail.	Yes		No				No	Yes	No	I find women who are not only mothers but also career driven tend to be much better.
152	UK	yes	yes		yes	yes
153	UK	yes	yes		yes	yes	Male	36-45	>35	Other	UK	Morocco	40			Married	Married/Partnership	Married/Partnership	2	Service Design Consultant	Bachelor's degree	Bachelor's degree	Non-Higher Education	Non-Higher Education	Good	1	Yes							Men												Men try to Multitask	Yes		Yes
154	UK	yes	yes		no	yes
155	UK	yes	yes		yes	yes	Female	36-45	>35	Other	UK	Netherlands	13			In a domestic partnership or civil union	Married/Partnership	Married/Partnership	0	Freelance Journalist	Some college, no degree	Some college, no degree	Non-Higher Education	Non-Higher Education	Poor	2015-02-04	No	I think that it is down to individual differences rather than gender differences.	No	I'm not sure about types, but I do believe that some people get more easily distracted than others and that some people need to focus on a single task in order to complete it successfully.		No	It depends on personal skills - if one is very skilled at something, it may be easier to combine it with other tasks, depending on what the something is.
156	UK	yes	yes		yes	yes	Female	26-35	<=35	Other	Other	Australia	2 months			Married	Married/Partnership	Married/Partnership	0	PhD student	Graduate or professional degree	Graduate or professional degree	Higher Education	Higher Education	Good	1	No	I think it depends more on personalities	No	People who are naturally more organised are better		Yes
157	UK	yes	no		yes	yes
158	UK	yes	yes		yes	yes	Female	46-55	>35				40 years			Single	Single	Single	3		Some college, no degree	Some college, no degree	Non-Higher Education	Non-Higher Education	Average	1	No	People choose to multitasking or not	Yes		People learn how to multitasking. It is a learned behaviour
159	UK	yes	yes		yes	yes	Male	46-55	>35	Other	UK	Morocco	43			Married	Married/Partnership	Married/Partnership	2	WORKSHOP MANAGER	Some college, no degree	Some college, no degree	Non-Higher Education	Non-Higher Education	Good	2015-08-10	No	I DON'T BELEIVE IT'S DOWN TO GENDER BUT MORE ABOUT THE ATTITUDE OF THE PERSON	No	MORE TO DO WITH YOUR SURROUNDINGS
160	UK	yes	yes		yes	yes	Male	26-35	<=35	UK	UK					Married	Married/Partnership	Married/Partnership	2	Admin Assistant	Bachelor's degree	Bachelor's degree	Non-Higher Education	Non-Higher Education	Good	2015-08-10	Yes							Women	Better organisational skills	Yes		No				No	Yes	No	Career driven woman
161	UK	yes	yes		yes	yes	Male	26-35	<=35	UK	UK					Single, never married	Single	Single	2	Programmer	Some college, no degree	Some college, no degree	Non-Higher Education	Non-Higher Education	Good	2015-08-10	No	everyone regardless of gender are different at multitasking and particular tasks.	Yes		Knowing the subject they are doing is a big help but no one thing makes a person good, anyone could put their mind to it with practice.
162	UK	yes	no		yes	yes
163	UK	no	no		yes	yes
164	UK	yes	yes		yes	yes	Male	26-35	<=35	UK	UK					Married	Married/Partnership	Married/Partnership	3	sales manager	Some college, no degree	Some college, no degree	Non-Higher Education	Non-Higher Education	Good	2015-08-10	Yes							Women	ability to react quicker, to several tasks rather than 1 at a time.	No	men could be slower, to react to more than 1 simultaneous task.	No				No	Yes	Yes
165	UK	yes	yes		yes	yes	Female	18-25	<=35	UK	UK					Single	Single	Single	0	Student	Some college, no degree	Some college, no degree	Non-Higher Education	Higher Education	Good	2015-02-04	Yes							Women	Women are able to do many things at once, including cooking whilst on the phone whilst looking after a baby and keeping an eye out on the washing, where as men may find this difficult	Yes		No				No	Yes	Yes
166	UK	yes	yes		yes	yes	Male	36-45	>35	UK	UK					Divorced	Divorced	Married/Partnership	0	Property Manager	High school graduate (includes equivalency)	High School	Non-Higher Education	Non-Higher Education	Average	2015-02-04	No	Individual intelligence and ability is more important than gender	No	High IQ or active minds I would imagine to be better		Yes
167	UK	yes	no		yes	yes
168	UK	yes	yes		yes	yes	Male	36-45	>35	UK	UK					Single, never married	Single	Single	0	None (formerly Technical Consultancy)	Some college, no degree	Some college, no degree	Non-Higher Education	Non-Higher Education	Very Poor	0	No	I don't. I simply have no reason to suspect they do. Given my lack of data on the subject, I consider it equally likely that there are other reasons than gender to differentiate competencies in multitasking. Given that there are an almost infinite way to group people and that gender is merely one, in an absence of information it would be reasonable to suspect that gender MAY be related to differe…	No	Tautologically: the "type" of people who are good at multitasking must necessarily form a group defined by their ability to multitask. I have no other preconceived opinions about such abilities as I have no data on which to base such opinions.		Yes	The type of people who are good at multitasking are grouped together only because of their (tautological) general effectiveness at multitasking. I'm not sure how one would define *types* of multitasking, either. Are there different types of simultaneous action that can be distinguished categorically from others? Or is it the actions themselves that can be categorised, rather than the type of simu…
169	UK	yes	yes		yes	yes	Male	36-45	>35	Other	UK	Morocco	41			Single	Single	Single	3	PE teacher	Some college, no degree	Some college, no degree	Non-Higher Education	Non-Higher Education	Average	2015-05-07	No	It's down to the individual and how often they multitask in order to get better	Yes		Someone who uses that skill more often			Women
170	UK	yes	no		yes	yes
171	UK	yes	yes		yes	yes	Female	36-45	>35	UK	UK					Married	Married/Partnership	Married/Partnership	1	Solicitor	Graduate or professional degree	Graduate or professional degree	Higher Education	Higher Education	Very good	2015-08-10	Yes							Women	Partially due to childcare requirements. A seemingly natural need to 'nest'. A need to compete caused by previous inequalities.	Yes		No				Yes	Yes	Yes
172	UK	yes	no		yes	yes
173	UK	yes	yes		yes	yes	Male	26-35	<=35	UK	UK					Married	Married/Partnership	Married/Partnership	0	Immigration escort	Some college, no degree	Some college, no degree	Non-Higher Education	Non-Higher Education	Average	2015-02-04	Yes							Women	My outlook and experience	Yes		Yes	Because they have a high sense of sharpness and biology has a factor	Yes
174	UK	yes	yes		yes	yes	Female	26-35	<=35	UK	UK					Married	Married/Partnership	Married/Partnership	0	Relocation specialist	Bachelor's degree	Bachelor's degree	Non-Higher Education	Non-Higher Education	Very good	10	Yes							Women	Women are taught to be able to handle different tasks and needs.	Yes		Yes	Men do not have the patience to be able to fully concentrate on two things at once.	Yes
175	UK	yes	yes		yes	yes	Female	46-55	>35	Other	UK	Morocco	41 years			Widowed	Widowed	Married/Partnership	4	Housewife	Less than high school	Less than high school	Non-Higher Education	Non-Higher Education	Average	2015-02-04	No
176	UK	yes	yes		yes	yes	Female	46-55	>35	UK	UK					Married	Married/Partnership	Married/Partnership	2	IT system analyst	Bachelor's degree	Bachelor's degree	Non-Higher Education	Non-Higher Education	Excellent	2015-08-10	Yes							Women	Memory, good at planning and scheduling.	No	I can organise and plan multiple activities but my husband often forgets things if having to organise more than 3 things in a short period of time,	No				No	Yes	Yes
177	UK	yes	yes		yes	yes	Female	26-35	<=35	UK	UK					Married	Married/Partnership	Married/Partnership	3	Supervisory assistant	High school graduate (includes equivalency)	High School	Non-Higher Education	Non-Higher Education	Very good	2015-05-07	Yes							Women	Because majorette of men can't handle the pressure of multitasking.	Yes		No				Yes	Yes	Yes
178	UK	yes	no		yes	yes
179	UK	yes	yes		yes	yes	Female	26-35	<=35	UK	UK					Married	Married/Partnership	Married/Partnership	0	primary school teacher	Bachelor's degree	Bachelor's degree	Non-Higher Education	Non-Higher Education	Good	2015-05-07	Yes							Women	Women by nature concern themselves with many things at any given time. It is in a woman's nature to speak over people in conversation whilst also listening, to nurture conflicting aspirations such as a career, raising a family etc where as (in my experience) men will focus on one thing and having conquered that may add to their list of accomplishments. I think this ability to strive towards maany…	Yes		No				No	Yes	Yes
180	UK	yes	yes		yes	yes	Female	18-25	<=35	UK	UK					Single, never married	Single	Single		Student	Some college, no degree	Some college, no degree	Non-Higher Education	Higher Education	Average	10	No	Men and women are both capable of the same things	Yes		Being able to complete two things as once whilst being organised
181	UK	yes	no		yes	yes
182	UK	yes	yes		yes	yes	Female	18-25	<=35	UK	UK					Single	Single	Single	0	Student	Some college, no degree	Some college, no degree	Non-Higher Education	Non-Higher Education	Good	2015-02-04	Yes							Women	I believe women are better because they have to multitask when they have children	Yes		No				Yes	Yes	Yes
183	UK	yes	yes		yes	yes	Female	36-45	>35	UK	UK					Married	Married/Partnership	Married/Partnership	3	cinema worker	Some college, no degree	Some college, no degree	Non-Higher Education	Non-Higher Education	Very good	2015-02-04	No	depends on personality and ability not gender	No	some people are more organised		No	if you are organised you can predict & prepare more than one thing at a time
184	UK	yes	yes		yes	yes	Female	18-25	<=35	UK	UK					Single, never married	Single	Single		student	Some college, no degree	Some college, no degree	Non-Higher Education	Higher Education	Average	2015-02-04	No	Do not think gender has a strong link to multi tasking. Rather, how each individual's brain functions.	No	People who are better able to concentrate on what they are doing and not easily distracted.		Yes
185	UK	yes	yes		yes	yes	Female	18-25	<=35	UK	UK					In a domestic partnership or civil union	Married/Partnership	Married/Partnership	1	Stay At Home Parent	Some college, no degree	Some college, no degree	Non-Higher Education	Non-Higher Education	Good	2015-05-07	Yes							Women
186	UK	yes	no		yes	yes
187	UK	yes	yes		yes	yes	Female	46-55	>35	Other	UK	Morocco	41			Married	Married/Partnership	Married/Partnership	2	admin manager	Some college, no degree	Some college, no degree	Non-Higher Education	Non-Higher Education	Very good	2015-02-04	Yes							Women	because they are normally the ones who take care of the children so they have to do more than one thing	Yes		No				No	Yes	No	because everyone is diffrent depending on their experiances
188	US	Yes	Yes		Yes	Yes	Female	18-25	<=35	US	US					Single, never married	Single	Single	0	pharmacy technician, student	Bachelor's degree	Bachelor's degree	Non-Higher Education	Non-Higher Education	Average	2015-07-05	No	Ability is not gender specific; both sexes fall all over the spectrum of multitasking capability. Likely linked to nurture/developmental environment more than gender.	Yes	People who've been brought up in situations (parental lessons or spontaneous events) that required multitasking from a younger age are more likely to be better at it, from myelin sheath activity perspective if nothing else.	Refer to previous question's response. Reinforcement of the activity (multitasking) results in proficiency of the skill. To be "good" at anything you have to perform the action, so people who multitask on a daily basis are obviously going to be more capable at it than people who don't.
189	US	Yes	Yes		Yes	Yes	Female	26-35	<=35	US	US					Married	Married/Partnership	Married/Partnership	1	Stay at home mother/homeschool teacher/student	Bachelor's degree	Bachelor's degree	Non-Higher Education	Non-Higher Education	Very good	10	Yes							Women	Male and female brains are different. The gender difference isn't always true, though. Plenty of women are terrible at multitasking and vise versa.	Yes	Most people, regardless of gender, can handle a few tasks at a time.	No				Yes	No	No
190	US	Yes	No	No
191	US	Yes	Yes		Yes	Yes
192	US	Yes	Yes		Yes	Yes
193	US	Yes	Yes	Yes	Yes	Yes	Female	18-25	<=35	US	US					Single, never married	Single	Single	0	student, not employed	Some college, no degree	Some college, no degree	Non-Higher Education	Non-Higher Education	Average	2015-04-02	No
194	US	Yes	Yes		Yes	Yes	Female	18-25	<=35	US	US					Single, never married	Single	Single	0	Student	Some college, no degree	Some college, no degree	Non-Higher Education	Higher Education	Very Poor	2015-04-02	No	Perceived gender differences arise from the way different groups of people are socialized, not from inherent differences in their abilities.	Yes	There are certain developmental disabilities and disorders that affect certain parts of executive function, which makes multitasking even more difficult. Neurotypical people tend to be more efficient at multitasking.	Practice probably helps, as people who are asked to multitask more often (generally, women and other female-identified people) are often perceived as 'better' at it. Again, as stated before, neurotypical people are also better at this because of unimpaired executive function.
195	US	Yes	Yes		Yes	Yes	Female	18-25	<=35	US	US					Single, never married	Single	Single	0	Student	High school graduate (includes equivalency)	High School	Non-Higher Education	Higher Education	Good	2015-04-02	No
196	US	No	No
197	US	Yes	Yes		Yes	Yes	Female	18-25	<=35	US	US					Single	Single	Single	0	Teacher	Bachelor's degree	Bachelor's degree	Non-Higher Education	Non-Higher Education	Average	2015-07-05	No	I don't believe there's really that much of an essential difference between men and women, and that the observable differences are culturally taught. That being said, it would be strange of me to think there was an essentially gendered difference in the ways that men and women multitask.	No	==		No
198	US	Yes	Yes		Yes	Yes	Female	26-35	<=35	US	US					Single, never married	Single	Single	0	Customer Service Representative	Bachelor's degree	Bachelor's degree	Non-Higher Education	Non-Higher Education	Good	2015-07-05	No	I think it's more a matter of brain chemistry, how we've learned to focus (which, idk, might be a function of how interested or bored we were in school?), learning styles, etc. than gender.	No			No	I said no previously
199	US	Yes	No	No
200	US	Yes	Yes		Yes	Yes	Female	18-25	<=35	US	US					Single	Single	Single	0	Student	Some college, no degree	Some college, no degree	Non-Higher Education	Higher Education	Average	1	No	I don't think multitasking really depends on gender	Yes	Maybe people with a higher work ethic, if that makes any sense	If they can take on a lot of things and finish everything they had to do
201	US	Yes	Yes		Yes	Yes	Female	18-25	<=35	US	US					Single, never married	Single	Single	0	Teacher	Bachelor's degree	Bachelor's degree	Non-Higher Education	Non-Higher Education	Good	2015-04-02	No	I haven't seen much evidence to the contrary.	Yes	People who have grown up multitasking or have trained themselves to multitask over a long period of time are better at it.	Selective focus, being able to glean the most important information from the stimuli, quick physical and mental reflexes
202	US	Yes	Yes		Yes	Yes
203	US	Yes	Yes		Yes	Yes	Female	18-25	<=35	US	US					Single	Single	Single	0	Barista	High school graduate (includes equivalency)	High School	Non-Higher Education	Non-Higher Education	Very good	2015-07-05	Yes							Women	Personal observation	No		Yes	I've witnessed women being more capable of multitasking both at home and in the workplace	No
204	US	Yes	Yes		Yes	Yes	Female	18-25	<=35	US	US					Single, never married	Single	Single	0	Student	High school graduate (includes equivalency)	High School	Non-Higher Education	Higher Education	Average	2015-04-02	Yes							Women	Stereotype	No		Yes
205	US	Yes	Yes		Yes	Yes	Female	18-25	<=35	US	US					Single, never married	Single	Single	0	unemployed	Some college, no degree	Some college, no degree	Non-Higher Education	Non-Higher Education	Poor	1	No	I don't see any one reason that would greatly imbalance multitasking skills	Yes	People in office settings because of the frequency they multitask. They will probably be able to improve their ability to do more than one thing at a time.	Practice
206	US	Yes	No	No
208	US	Yes	Yes		Yes	Yes	Female	26-35	<=35	US	US					Married	Married/Partnership	Married/Partnership	2	Teacher	Graduate or professional degree	Graduate or professional degree	Higher Education	Higher Education	Average	10	No	I have no proof that they do. So therefore, why would they?	Yes	Probably people that are better organized.	Being well organized.
209	US	Yes	Yes		Yes	Yes
210	US	No	No
211	US	Yes	Yes		Yes	Yes	Female	18-25	<=35	Other	Other	Lithuania	0			Single, never married	Single	Single	0	Student, Babysitter	Some college, no degree	Some college, no degree	Non-Higher Education	Non-Higher Education	Good	2015-04-02	No	Because there's no reason that they should, each person is different and should be judged individually as opposed to by gender or some other arbitrary category	Yes	People whose lives and personalities demand it will be better as they have had more practice at it, ie. 'Type A' people will be better at multitasking	Being able to successfully complete several tasks at the same time
212	US	Yes	Yes		Yes	Yes	Male	over 65	>35	US	US					Married	Married/Partnership	Married/Partnership	6	retired high school teacher	Graduate or professional degree	Graduate or professional degree	Higher Education	Higher Education	Very good	1	Yes							Men												experiential women are" catching up"	No		Yes
213	US	Yes	Yes		Yes	Yes
214	US	Yes	No	No
215	US	Yes	No	No
216	US	Yes	No	No
217	US	No	No
218	US	Yes	Yes		Yes	Yes	Female	18-25	<=35	US	US					Single	Single	Single	0	student	Some college, no degree	Some college, no degree	Non-Higher Education	Higher Education	Excellent	2015-04-02	No	I haven't heard any conclusive evidence to prove there is a difference.	Yes	It depends on the person but I have a theory that people with ADD are better because the focus on two things better than one. I am not a scientist.	Focus
219	US	No	No
220	US	Yes	Yes		Yes	Yes	Female	18-25	<=35	US	US					Single, never married	Single	Single	0	Full-time student	Some college, no degree	Some college, no degree	Non-Higher Education	Non-Higher Education	Average	2015-07-05	Yes							Women	The gender roles placed upon women by society (i.e. being mothers while still maintaining relationships and careers) has forced them to hone their multitasking skills over time.	Yes		Yes	Men have TYPICALLY not been expected or required to fulfill the role of childcare provider in addition to their other roles.	No
221	US	Yes	Yes		Yes	Yes	Female	18-25	<=35	US	US					Single, never married	Single	Single	0	none	Some college, no degree	Some college, no degree	Non-Higher Education	Non-Higher Education	Good	2015-07-05	No	There's no biological binary of gender so it wouldn't make sense for there to be a clear biological difference between men and women in an area such as multitasking.	Yes	I'm not 100% positive but I'm reasonably sure people with ADD or other neurological disorders that affect the attention span would have affected multitasking ability.	Being able to switch back and forth between tasks quickly and hold a lot of information in the brain at once.
222	US	Yes	No	Yes	Yes	Yes	Female	26-35	<=35	US	US					Single, never married	Single	Single	0	unemployed	Some college, no degree	Some college, no degree	Non-Higher Education	Non-Higher Education	Poor	2015-04-02	No	I don't know why they would	Yes	I feel like it depends on memory retention skills	memory retention skills
223	US	Yes	Yes		Yes	Yes	Female	26-35	<=35	US	US					Single, never married	Single	Single		Legal Librarian	Graduate or professional degree	Graduate or professional degree	Higher Education	Higher Education	Good	2015-07-05	No	I think if there is a difference it is completely socially learned	Yes	I think that some people have a better ability to focus on one task only, and there are others who have the ability to multitask.	the ability to quickly switch from one focus area to another, yet keep all of the areas in organized form.
224	US	Yes	No	Yes	Yes	Yes	Female	18-25	<=35	US	US					Single, never married	Single	Single	0	Sales Associate	Some college, no degree	Some college, no degree	Non-Higher Education	Non-Higher Education	Good	2015-04-02	Yes							Women	Experience generally makes people better at things. Society gives women roles that coerce them to do many things at one time, especially as mothers.	No		Yes	They are generally expected to be so.	Yes	Once again, experience is a large factor in this; women who are not mothers will not have to experience as much in the way of childcare and such.
225	US	Yes	Yes		Yes	Yes	Female	18-25	<=35	US	US					Single, never married	Single	Single	0	princess entertainer with childrens birthday party company	Some college, no degree	Some college, no degree	Non-Higher Education	Non-Higher Education	Poor	2015-04-02	No	I don't think humans are generally "programmed" to multitask well at all.	No			No
226	US	Yes	Yes		Yes	Yes	Female	18-25	<=35	Other	Other	Canada	0			Single, never married	Single	Single	0	store assistant manager in retail	Associate's degree	Associate's degree	Non-Higher Education	Non-Higher Education	Very good	2015-10-08	No	Because in a retail setting, its all about the training of the employee. You cannot expect them to multitask if you have not shown them how to multitask. Some people are better at it than others.	No			No
227	US	No	Yes
228	US	Yes	Yes
229	US	Yes	Yes		Yes	Yes	Male	18-25	<=35	US	US					Single, never married	Single	Single	0	student	Some college, no degree	Some college, no degree	Non-Higher Education	Higher Education	Very good	2015-07-05	No	There's no reason for them to. It's an individual thing.	Yes		Ability to focus when it matters, doesn't lose track of things.
230	US	Yes	Yes		Yes	Yes
231	US	Yes	Yes		Yes	Yes	Female	18-25	<=35	US	US					Single, never married	Single	Single	0	Kohls Sales associates	Less than high school	Less than high school	Non-Higher Education	Non-Higher Education	Very Poor	1	No	Because I think the only difference, biologically, between cisgender men and women, is bodily and therefore, they both have equal ability to multitask.	Yes	People who have less stress can multitask better.	Being relatively stress free
232	US	No	No
233	US	No	No
234	US	Yes	No
235	US	Yes	Yes		Yes	Yes	Female	18-25	<=35	US	US					Single, never married	Single	Single	0	Student	Less than high school	Less than high school	Non-Higher Education	Higher Education	Poor	2015-04-02	No	I don't think multitasking is something affected by gender	Yes	Those with better focus are better at multitasking	Ability to focus
236	US	Yes	No	No
237	US	Yes	No	No
238	US	Yes	No
239	US	Yes	Yes
240	US	Yes	No	No
241	US	Yes	Yes		Yes	Yes	Male	36-45	>35	US	US					Single, never married	Single	Single	0	Lawyer	Graduate or professional degree	Graduate or professional degree	Higher Education	Higher Education	Very Poor	2015-04-02	No	Haven't noticed any difference.	Yes	People who apparently aren't able to concentrate completely on one thing seem to multitask better.	Inability to focus
242	US	Yes	No	Yes	Yes	Yes
243	US	Yes	Yes		Yes	Yes	Male	18-25	<=35	US	US					Single	Single	Single		Software Developer Lead	Bachelor's degree	Bachelor's degree	Non-Higher Education	Non-Higher Education	Good	2015-04-02	No	I'm not aware of any evidence that suggests the different physiologies between men and women relate to multitasking abilities - at least not as a major factor.	Yes	People who are well organized or who are quick to pick up on new ideas are likely better able to multitaks.	The ability to know their own brain's limits of what they can keep track of in their head at once, and the ability to restart tasks quickly.
244	US	Yes	Yes		Yes	Yes
245	US	Yes	No	Yes	Yes	Yes	Female	18-25	<=35	US	US					Single, never married	Single	Single	0	Food industry server	Bachelor's degree	Bachelor's degree	Non-Higher Education	Non-Higher Education	Excellent	2015-07-05	Yes							Women	They can handle multiple tasks at once	Yes		Yes	They're able to manage and spilt their focus and attention on multiple things at once	No
246	US	No	No
247	US	Yes	Yes	No	Yes	Yes
248	US	Yes	No	No
249	US	Yes	Yes		Yes	Yes	Female	18-25	<=35	US	US					Single, never married	Single	Single	0	Student	High school graduate (includes equivalency)	High School	Non-Higher Education	Non-Higher Education	Good	2015-07-05	Yes							Women
250	US	Yes	Yes		Yes	Yes
251	US	Yes	Yes		Yes	Yes
252	US	Yes	Yes		Yes	Yes	Female	18-25	<=35	US	US					Single, never married	Single	Single	0	Student	High school graduate (includes equivalency)	High School	Non-Higher Education	Higher Education	Good	2015-04-02	No
253	US	Yes	No	No
254	US	Yes	Yes
255	US	Yes	Yes		Yes	Yes
256	US	Yes	No	Yes	Yes	Yes
257	US	Yes	Yes		Yes	Yes	Male	18-25	<=35	UK	UK		0			In a domestic partnership or civil union	Married/Partnership	Married/Partnership	0	Student	Some college, no degree	Some college, no degree	Non-Higher Education	Non-Higher Education	Average	2015-10-08	Yes							Women
258	US	Yes	Yes		Yes	Yes	Female	18-25	<=35	US	US					Single	Single	Single	0	student	Graduate or professional degree	Graduate or professional degree	Higher Education	Higher Education	Very good	2015-07-05	Yes							Women	I don't actually know	No		Yes	they're had lots of time to practice	No
259	US	Yes	No	No
260	US	Yes	Yes		Yes	Yes
261	US	No	Yes
262	US	Yes	No	Yes	Yes	Yes	Female	18-25	<=35	US	US					Single, never married	Single	Single	0	Student	Less than high school	Less than high school	Non-Higher Education	Higher Education	Poor	2015-04-02	No	I just don't see why they would.	Yes	I think you can be better at it if you're more organized and have the willpower to manage your time and not get distracted by yet another thing.	Willpower to not procrastinate or forget one of the things you're doing.
263	US	Yes	No	Yes	Yes	Yes	Female	18-25	<=35	US	US					In a domestic partnership or civil union	Married/Partnership	Married/Partnership	0	College Student (Math Major)	Some college, no degree	Some college, no degree	Non-Higher Education	Non-Higher Education	Extremely bad	1	No	They don't	Yes	If the person has certain tasks down to muscle memory, they might be able to do more than one of them at once. Or if the person is a Type B personality, not giving much thought to the tasks (as it seems impossible to devote much attention over more than one task.)	Muscle memory or relaxed/confident attitude
264	US	Yes	Yes		Yes	Yes	Female	18-25	<=35	US	US					Single, never married	Single	Single	0	Starbucks Barista	Some college, no degree	Some college, no degree	Non-Higher Education	Non-Higher Education	Good	2015-07-05	No	Men and women have the capacity to preform at the same levels.	Yes	People who have more of a type A personality because they can be over-achievers.	Being able to focus on and distinguish from multiple ideas simultaneously.
265	US	Yes	Yes		Yes	Yes	Female	18-25	<=35	UK	UK		4			Single, never married	Single	Single	0	Unemployed	Some college, no degree	Some college, no degree	Non-Higher Education	Non-Higher Education	Good	1	No	Because I do not see how biological sex can affect someone's mental capabilities	Yes	I think more intelligent people are better at multitasking	Intelligence, good at listening, good at concentrating
266	US	Yes	No	Yes
267	US	Yes	No	Yes	Yes	Yes	Female	18-25	<=35	Other	Other	Australia	0			Single, never married	Single	Single	0	-	High school graduate (includes equivalency)	High School	Non-Higher Education	Non-Higher Education	Good	2015-04-02	No
268	US	Yes	Yes		Yes	Yes	Female	18-25	<=35	US	US					Single, never married	Single	Single	0	Student	Some college, no degree	Some college, no degree	Non-Higher Education	Higher Education	Extremely bad	1	No	Thought processes and performance tasks aren't inherently gendered.	No	Everybody sucks at it.		No	EVERYBODY SUCKS AT MULTITASKING
269	US	Yes	Yes		Yes	Yes	Female	18-25	<=35	US	US					Single, never married	Single	Single	0	College student	Some college, no degree	Some college, no degree	Non-Higher Education	Non-Higher Education	Average	2015-10-08	Yes							Women
270	US	Yes	No	No
271	US	Yes	Yes		Yes	Yes	Female	18-25	<=35	UK	UK		I do not			Single, never married	Single	Single	0	Student	High school graduate (includes equivalency)	High School	Non-Higher Education	Higher Education	Average	2015-04-02	No	I'm pretty bad which defeats a stereotype	Yes	More organised people are better at it.	Separated brain functions?
272	US	Yes	Yes		Yes	Yes
273	US	Yes	Yes		Yes	Yes
274	US	Yes	No	Yes	Yes	Yes
275	US	No	Yes
276	US	Yes	Yes		Yes	Yes	Female	18-25	<=35	Other	Other	Saudi Arabia	4 years			Single, never married	Single	Single	0	Student	High school graduate (includes equivalency)	High School	Non-Higher Education	Higher Education	Very good	2015-07-05	Yes							Women	The great demand on them to be able to do everything has forced them to be able to multitask	Yes	When you are forced to do many tasks, you start to learn to multi task	Yes	The great demand on them to be able to do everything has forced them to be able to multitask	Yes	The women who are expected to do many things in a day. it does not only have to be a mother and a careerist.
277	US	Yes	Yes		Yes	Yes	Male	18-25	<=35	Other	Other	France	0			Single, never married	Single	Single	0	Student	Bachelor's degree	Bachelor's degree	Non-Higher Education	Higher Education	Good	2015-10-08	No	Because I never noticed any difference (I did notice however a lot of people saying there was.)	No			No
278	US	Yes	Yes		Yes	Yes	Female	18-25	<=35	US	US					Single, never married	Single	Single	0	administrative assistant	Bachelor's degree	Bachelor's degree	Non-Higher Education	Non-Higher Education	Good	2015-07-05	No	I believe it depends on one's upbringing, personality, and environment.	No			No
279	US	Yes	No	Yes	Yes	Yes	Female	18-25	<=35	US	US					Single	Single	Single	0	Refferee	High school graduate (includes equivalency)	High School	Non-Higher Education	Non-Higher Education	Average	2015-04-02	No	It depends on the person/personality	Yes	Some people are more used to it, because they have practiced multitasking before or more often than other people	The ability to mindlessly complete one task, and able to give your full attention to a different one at the same time
280	US	Yes	Yes		Yes	Yes	Female	18-25	<=35	US	US					Single, never married	Single	Single	0	Unemployed	Less than high school	Less than high school	Non-Higher Education	Non-Higher Education	Very good	2015-10-08	Yes							Women	Because they aren't busy thinking with their dicks. No, in all honesty, I think it has to do with both nature and nurture. Women tend to take on more work, thus have more need to multitask. Also, from a young age, females are expected to be able to do multiple things, whereas men don't have that pressed upon them.	No		No				Yes	No	No
281	US	Yes	Yes		Yes	Yes	Female	18-25	<=35	US	US					Single, never married	Single	Single	0	High School student	Less than high school	Less than high school	Non-Higher Education	Non-Higher Education	Good	2015-04-02	No	Because at the end of the day, it is not gender that determines it, but instead the type of person you are- not gender	Yes	People who are more focused are able to multitask more because they have been able to focus on one skill set so well that the other task they are multitasking they can focus on without worrying about the part they already have mastered	the ABILITY TO FOCUS on singular tasks AND realize that multitasking is not a piece of cake
282	US	Yes	No	No
283	US	Yes	Yes		Yes	Yes	Female	18-25	<=35	US	US					Single, never married	Single	Single	0	waitress	Some college, no degree	Some college, no degree	Non-Higher Education	Non-Higher Education	Poor	2015-07-05	No	gender variances are arbitrary	Yes	people who are in the habit of multitasking are better at multitasking.	not getting easily caught up in one task or getting distracted.
284	US	Yes	Yes		Yes	Yes	Female	18-25	<=35	Other	Other	Canada				Single, never married	Single	Single	0	Student	High school graduate (includes equivalency)	High School	Non-Higher Education	Higher Education	Good	2015-04-02	Yes							Women	I feel like I've seen more women successfully multitask.	No		No				Yes	No	No
285	US	Yes	No	No
286	US	Yes	No	Yes	Yes	Yes
287	US	Yes	No	No
288	US	Yes	Yes		Yes	Yes
289	Germany	yes	no	no
290	Germany	yes	yes		yes	yes	Male	56-65	>35	Germany	Germany					Verheiratet	Married/Partnership	Married/Partnership	5	Pension	Haupt-/Realschule	Less than high school	Non-Higher Education	Non-Higher Education	Poor	0	yes							Women	Das liegt in ihrer natur schwatzhaft	no		yes	sie können sich besser darauf einlassen	no
291	Germany	yes	no	yes	yes	yes	Female	26-35	<=35	Germany	Germany					Ledig (noch nie verheiratet)	Single	Single	0	Arbeiter	Haupt-/Realschule	Less than high school	Non-Higher Education	Non-Higher Education	Good	2015-02-04	yes							Women	Vergleiche im direkten Umfeld	no		yes	Organisisierter, strukturierter auch im Denken	no
292	Germany	yes	yes		yes	yes	Female	26-35	<=35	Germany	Germany					Verheiratet	Married/Partnership	Married/Partnership	1	Doktorand	Diplom / Master	Graduate or professional degree	Higher Education	Higher Education	Good	2015-02-04	yes							Women	biologische Unterschiede im Gehirn	no		no				yes	no	no
293	Germany	yes	yes		yes	yes	Male	36-45	>35	Germany	Germany					Verheiratet	Married/Partnership	Married/Partnership	2	Technischer Sachbearbeiter	Haupt-/Realschule	Less than high school	Non-Higher Education	Non-Higher Education	Poor	2015-02-04	no	Wenn beide Geschlechter den gleichen Bedingungen ausgesetzt sind und diese Tätigkeiten sich wiedeholen glaube ich das beide das Gleiche leisten können.	no			no
294	Germany	yes	yes		yes	yes	Female	over 65	>35	Other	Germany	Czech Republic	69			Geschieden	Divorced	Married/Partnership	0	Realleherein i. Ruhestand					Poor	1	no	warum sollten sie?	yes	Besser Veranlagung: evtl. oberflächlichere Wahrnehmung und Reaktionsfähigkeit, Glück...	Wenn sie mehrere Dinge gleichzeitig wahrnehmen und aus bestimmte Ansprüchen daraus effektiv reagieren bzw. diese gut handeln können
295	Germany	yes	yes		yes	yes	Female	36-45	>35	Germany	Germany					Ledig (noch nie verheiratet)	Single	Single	1	Educational Consultant	Diplom / Master	Graduate or professional degree	Higher Education	Higher Education	Average	2015-02-04	no	Ich glaube nicht, dass das eine Geschlechterfrage ist, sondern eher eine Fähigkeit, die sich jeder/r aneignen kann.	no			no
296	Germany	no	yes
297	Germany	yes	yes		yes	yes	Female	26-35	<=35	Germany	Germany					Zivile Partnerschaft	Married/Partnership	Married/Partnership	0	Kundenberaterin	(Fach-)Abitur	High School	Non-Higher Education	Non-Higher Education	Good	2015-02-04	yes							Women	Frauen fällt es leichter sich auf mehrere Dinge gleichzeitig zu konzentrieren.	no		no				yes	no	no
298	Germany	yes	yes		yes	yes	Female	46-55	>35	Germany	Germany					Verheiratet	Married/Partnership	Married/Partnership	2	Reinigungsfachkraft	Haupt-/Realschule	Less than high school	Non-Higher Education	Non-Higher Education	Good	2015-02-04	yes							Women
299	Germany	yes	yes		yes	yes	Female	46-55	>35	Germany	Germany					Verheiratet	Married/Partnership	Married/Partnership		arbeitslos	Diplom / Master	Graduate or professional degree	Higher Education	Higher Education	Poor	1	no	ist eher eine Sache der Persönlichkeit/desCharakters als des Geschlechts	yes	wie schon gesagt, eine Sache der Persönlichkeit/desCharakters	alle Tätigkeiten gleich gut erledigen und keine halben Sachen machen
300	Germany	yes	yes		yes	yes	Female	46-55	>35	Germany	Germany					Ledig	Single	Single		Personalentwicklerin	Diplom / Master	Graduate or professional degree	Higher Education	Higher Education	Poor	10	yes							Women	Ich halte diese Fraqgen für zu standardiesiert. ich antworte niocht entsprechend der Realität, weil diese nicht abgefragt wird. Frauen werden früher sozialisiert auf ander aufzupassen und dabei DENNOCH IHREN EIGENEN aUFGABEN NAHZUGEHEN UND DIEE ZU VERBINDEN:	no		yes	WILL ICH NICHT; DAS NERVT-DOOFER FB	yes
301	Germany	yes	yes		yes	yes	Female	26-35	<=35	Germany	Germany					Zivile Partnerschaft	Married/Partnership	Married/Partnership	1	Diplom Sozialpädagogin	Diplom / Master	Graduate or professional degree	Higher Education	Higher Education	Very good	2015-02-04	yes							Women	Weil ich täglich in meinem Beruf diese Fähigkeit brauche und zufriedenstellend einsetzte um effizient zu arbeiten	yes	Seid der Steinzeit sind es die Frauen gewesen, die sich um das Feuer und die Kindererziehung zeitgleich, kümmern mussten	yes	weil es Frauen im Blut liegt	yes	Ich habe auch einige Frauen kennengelernt, bei denen Multitasking zu vermehrtem Stress führt und am Ende jede Aufgabe nur halb ausgeführt wurde
302	Germany	yes	yes		yes	yes	Male	26-35	<=35	Germany	Germany					Ledig (noch nie verheiratet)	Single	Single	0	Softwareentwickler	(Fach-)Abitur	High School	Non-Higher Education	Non-Higher Education	Good	2015-02-04	no	Multitasking ist eine zu erlernende Technik.	yes	Es hängt vom persönlichen Erfahrungswerten, sowie von den allgemeinen Tätigkeiten ob man gut Mutlitasken kann.	Alle Tätigkeiten zu tracken und immer zu wissen, welchen Stand ein Thema hat.
303	Germany	yes	yes		yes	yes	Male	46-55	>35	Germany	Germany					Verheiratet	Married/Partnership	Married/Partnership	0	Bankmitarbeiter	(Fach-)Abitur	High School	Non-Higher Education	Non-Higher Education	Poor	2015-02-04	yes							Women	Genetisch bedingt	no		yes	Genetisch bedingt	no
304	Germany	no	no
305	Germany	yes	yes		yes	yes	Female	46-55	>35	Germany	Germany		46			Ledig (noch nie verheiratet)	Single	Single	0	soziale Einrichtung	Diplom / Master	Graduate or professional degree	Higher Education	Higher Education	Very good	2015-05-07	no	der Streßpegel der hierbei entsteht, besonders wenn es sich um einen von außen auferlegten Multitasking handelt, ist für beide Geschlechter gleich. er wird nur unterschiedlich "artikuliert".	yes	ja, aber nicht auf Dauer. .	Erlebnishunger, geringe Nachhaltigkeit, mangelnde Konzentration
306	Germany	yes	yes		yes	yes	Female	26-35	<=35	Germany	Germany					Ledig (noch nie verheiratet)	Single	Single	0	Sozialpädagogin/Supervisorin	Diplom / Master	Graduate or professional degree	Higher Education	Higher Education	Excellent	2015-02-04	yes							Women	Melden mir meine männlichen Kollegen rück. Heute meinte erst einer, er sei neidisch.	yes	Ich denke, dass Frauen trotz mehrerer Tätigkeiten gleichzeitig einer inneren Struktur folgen, um nicht durcheinander zu kommen, welchen vielen Männern nicht möglich ist.	no				yes	no	no
307	Germany	yes	yes		yes	yes	Male	36-45	>35	Germany	Germany		45			Verheiratet	Married/Partnership	Married/Partnership	2	IT Business Consultant	Vordiplom / Bachelor	Bachelor's degree	Non-Higher Education	Non-Higher Education	Poor	2015-02-04	yes							Women
308	Germany	yes	yes		yes	yes	Female	46-55	>35	Germany	Germany		24			Zivile Partnerschaft	Married/Partnership	Married/Partnership	4	Kauffrau	Haupt-/Realschule	Less than high school	Non-Higher Education	Non-Higher Education	Good	2015-02-04	no	30 Jahre Berufserfahrung zeigen das	yes	Ist halt so, manche können gut Fussball spielen oder Bücher schreiben. einige können gut mehrere Sachen gleichzeitig erledigen	Weiß ich nicht
309	Germany	yes	yes		yes	yes	Female	36-45	>35	Germany	Germany					Ledig (noch nie verheiratet)	Single	Single	0	Dipl. Soz. Päd.	Diplom / Master	Graduate or professional degree	Higher Education	Higher Education	Very Poor	2015-02-04	no	Erziehung, Biographie und genetische Herkunft sind meiner Meinung nach für die Multitasking-Fähigkeit verantwortlich	no			no
310	Germany	yes	yes		yes	yes	Male	36-45	>35	Germany	Germany					Ledig (noch nie verheiratet)	Single	Single	1	Selbstständig	Haupt-/Realschule	Less than high school	Non-Higher Education	Non-Higher Education	Very good	2015-05-07	no	Ich habe jeweils Frauen und Männer kennengelernt, die MT jeweils gut beheerschen bzw. nicht	yes	Ich denke, es hängt mit (früh-)kindlichen Erfahrungen, Förderung der individuellen Fähigkeiten durch die Eltern/Lehrer und der späteren beruflichen Entwicklung, bzw. der Zufriedenheit im Leben, zusammen	Souveränität und Lebenskraft
312	Germany	yes	yes		yes	yes
313	Germany	yes	yes		yes	yes	Female	26-35	<=35	Germany	Germany					Verheiratet	Married/Partnership	Married/Partnership	2	Mutter	Promotion (Dr.-Titel)	Ph.D.	Higher Education	Higher Education	Poor	2015-05-07	no	Glaube dass Frauen als Mütter oft mehrere Dinge gleichzeitig im Blick haben müssen und deshalb der Mythos entstanden ist dass Frauen bessere Multitasker sind.	yes
314	Germany	yes	yes		yes	yes	Female	26-35	<=35	Germany	Germany					Zivile Partnerschaft	Married/Partnership	Married/Partnership	0	Doktorandin	Diplom / Master	Graduate or professional degree	Higher Education	Higher Education	Extremely bad	0	no	warum sollten sie?	yes	hoch automatisierte Tätigkeiten können irgendwann parallel ausgeführt werden, siehe Jongleure etc.	Training. Komplexe Tätigkeiten besser nicht multitasken.
315	Germany	no	yes		yes	yes	Male	26-35	<=35	Germany	Germany					Verheiratet	Married/Partnership	Married/Partnership	2	Fachinformatiker für Systemintegration	(Fach-)Abitur	High School	Non-Higher Education	Non-Higher Education	Poor	0	yes							Women	Weil sie sich um ein Kind kümmern müssen und gleichzeitig den Haushalt machen müssen.	no		yes	Weil sie sich um ein Kind kümmern müssen und gleichzeitig den Haushalt machen müssen.	yes	Weil sie sich um ein Kind kümmern müssen und gleichzeitig den Haushalt machen müssen.
316	Germany	no	yes
317	Germany	yes	yes		yes	yes	Male	46-55	>35	Germany	Germany					Ledig (noch nie verheiratet)	Single	Single	0	Angestellter ITK	(Fach-)Abitur	High School	Non-Higher Education	Non-Higher Education	Poor	1	yes							Women	In der öffentlichen Diskussion wird oft behauptet, dass das moderne Rollenverständnis der Frau (Familie+Beruf) Multitasking fördert. Außerdem soll es evolutionär bedingt Faktoren geben, die Multitasking bei Frauen herausgebildet und verfestigt haben.	yes	Wenn Multitasking tatsächlich die gleichzeitige Aufgabenausführung bedeutet, ja.	yes	Weil sie es in ihren Mehrfachrollen (Haushalt+Kindererziehung / Familie + Beruf) gelernt haben.	no
318	Germany	yes	yes		yes	yes	Male	36-45	>35	Germany	Germany					Ledig (noch nie verheiratet)	Single	Single	0	berater	Diplom / Master	Graduate or professional degree	Higher Education	Higher Education	Average	2015-02-04	yes							Women	frauen strukturieren besser	no		no				yes	no	yes	diejenigen, die strukturiert denken, chaoten gibt es geschlechtsunabhängig.
319	Germany	no	no
320	Germany	no	no	no
321	Germany	yes	yes		yes	yes	Female	26-35	<=35	Germany	Germany					Verheiratet	Married/Partnership	Married/Partnership	0	Industriekauffrau	Fachwirt	Associate's degree	Non-Higher Education	Non-Higher Education	Very good	2015-05-07	yes							Women	Habe bereits einen Multitaskingtest bei der deutschen Bahn absolviert in Rahmen eines Einstellungstest und sehr gut abgeschnitten	no		no				yes	no	no
322	Germany	yes	no	no
323	Germany	yes	yes	yes	yes	yes
324	Germany	yes	yes		yes	yes	Female	36-45	>35	Germany	Germany					Verheiratet	Married/Partnership	Married/Partnership	3	Lehrerin	Diplom / Master	Graduate or professional degree	Higher Education	Higher Education	Very good	10	yes							Women	Der Haushalt/ Kinder bleiben oft bei den Frauen hängen, der Tag hat nur 24 Stunden, man muss sich arrangieren.	yes		no				yes	no	yes	Sehr strukturierte Frauen.
325	Germany	yes	yes		yes	yes	Female	26-35	<=35	Germany	Germany					Verheiratet	Married/Partnership	Married/Partnership	3	Krankenschwester im ambulanten Dienst	(Fach-)Abitur	High School	Non-Higher Education	Non-Higher Education	Very good	10	yes							Women	Sie planen ihren zeitlichen Ablauf schneller. Leider haben die Damen immer so ein paar spontane Einfälle, die dann noch eingeplant werden müssen.	no		no				yes	no	yes	Die, die vorher fest im Arbeitsleben standen, suchen sich in der Elternzeit auch genügend (Haus-) Arbeit.
326	Germany	yes	no	no
327	Germany	yes	yes		yes	yes
328	Germany	yes	yes		yes	yes	Female	36-45	>35	Germany	Germany					Getrennt lebend	Divorced	Married/Partnership	2	Angestellte	Haupt-/Realschule	Less than high school	Non-Higher Education	Non-Higher Education	Average	10	yes							Women	weil sie sich auf mehrere Dinge gleichzeitig konzentrieren können, Männer dagegen erfahrungsgemäß nicht oder nur sehr schwer	yes	Multitasking bedeutet für mich sich auf mehr als 2 konzentrieren zu können	yes	Weil sie von Grund auf mehrere Dinge gleichzeitig machen	yes	ja, weil ich denke, dass es Frauen gibt, die sehr einfach gestrickt sind und im Zweifel mit mehreren Dingen gleichzeitig überfordert sind. Je nach dem wie ausgeprägt ihre Denkweise und ihr Organisationstalent ist
329	Germany	yes	yes		yes	yes	Female	36-45	>35	Germany	Germany					Verheiratet	Married/Partnership	Married/Partnership	2	MFA	Haupt-/Realschule	Less than high school	Non-Higher Education	Non-Higher Education	Very good	2015-05-07	yes							Women	Evolutionsbedingt	no		yes	...	no
330	Germany	yes	no
331	Germany	yes	no	no
332	Germany	no	no	no
333	Germany	yes	no	yes	yes	yes	Female	18-25	<=35	Germany	Germany					Ledig	Single	Single	0	Bäckereiverkäuferin	(Fach-)Abitur	High School	Non-Higher Education	Non-Higher Education	Good	2015-05-07	yes							Women	müssen auch im Alltag mehr im Kopf haben / mehr erledigen (siehe Kinderbetreuung, etc.)	yes	Frauen können mehr Aufgaben parallel ausführen als Männer	yes	Erfahrung, Übung, Kindererziehung /Haushalt	no
334	Germany	yes	no	yes	yes	yes
335	Germany	no	no	no
336	Germany	yes	yes		yes	yes	Female	46-55	>35	Germany	Germany					Verheiratet	Married/Partnership	Married/Partnership	0	Social Worker	Diplom / Master	Graduate or professional degree	Higher Education	Higher Education	Good	2015-08-10	yes							Women	Ich glaube Frauen sind eher mit dem Blick fürs Detail ausgestattet, das hilft letzlich beim priorieren von Arbeitsabläufen	yes		no				no	no	yes	Ich galube das auch nur ein bestimmter Typus Männer besser gut im Multtasking ist.
337	Germany	no	no	no
338	Germany	yes	yes		yes	yes	Male	46-55	>35	Germany	Germany					Ledig (noch nie verheiratet)	Single	Single	1	Regisseur	Haupt-/Realschule	Less than high school	Non-Higher Education	Non-Higher Education	Good	2015-02-04	no	Weil nur besondere Interessengebiete sich unterscheiden-	yes	Erfordernisse der Arbeit und/oder private Umstände erfordern dies. Ergo: Multitasking = Trainingsergebnis.	Geschulte Wahrnehmung + trainierte Denkstrukturen.
339	Germany	yes	no	yes	yes	yes	Male	26-35	<=35	Germany	Germany					Ledig (noch nie verheiratet)	Single	Single	0	Ingenieur	Diplom / Master	Graduate or professional degree	Higher Education	Higher Education	Average	2015-02-04	yes							Men												Das hab ich so im Gefuehl	yes	Ab 3 Dingen aendert sich das evtl.	no
340	Germany	yes	yes		yes	yes	Female	18-25	<=35	Germany	Germany					Verheiratet	Married/Partnership	Married/Partnership			Haupt-/Realschule	Less than high school	Non-Higher Education	Non-Higher Education	Average	0	yes							Women	Belastung ist besser.	no		yes	Belastung ist besser.	no
341	Germany	no	no	no
342	Germany	yes	yes		yes	yes	Female	36-45	>35	UK	UK		0			Ledig (noch nie verheiratet)	Single	Single	0	Portfolio Analyst	Vordiplom / Bachelor	Bachelor's degree	Non-Higher Education	Non-Higher Education	Poor	10	no
343	Germany	yes	yes
344	Germany	yes	no	no
346	Germany	yes	yes		yes	yes	Male	46-55	>35	Germany	Germany					Ledig	Single	Single	0	arbeitssuchend	Diplom / Master	Graduate or professional degree	Higher Education	Higher Education	Average	1	yes							Women
347	Germany	yes	yes		yes	yes	Female	36-45	>35	Other	Germany	Romania	19			Ledig (noch nie verheiratet)	Single	Single	0	Buero/Verwaltung	Diplom / Master	Graduate or professional degree	Higher Education	Higher Education	Excellent	2015-05-07	no	kommt auf die Person an und nicht auf deren Geschlecht	yes	Personen, die organisiert und konzentriert sind	prioritaeten setzen
348	Germany	yes	yes		yes	yes	Female	26-35	<=35	Germany	Germany					Zivile Partnerschaft	Married/Partnership	Married/Partnership		Krankenschweser	(Fach-)Abitur	High School	Non-Higher Education	Non-Higher Education	Excellent	2015-05-07	yes							Women	Männer konzentrieren sich nur auf 1 Sache	no		yes	Müssen früh lernen viele verschiedene Dinge gleichzeitig zu irganisieren	no
349	Germany	yes	yes		yes	yes	Female	26-35	<=35	Other	Other	Switzerland				Ledig (noch nie verheiratet)	Single	Single	0	Buchhalterin	Fachwirt	Associate's degree	Non-Higher Education	Non-Higher Education	Average	1	no	weil	no
350	Germany	yes	yes		yes	yes	Female	26-35	<=35	Germany	Germany					Ledig (noch nie verheiratet)	Single	Single	0	Wissenschaftler	Diplom / Master	Graduate or professional degree	Higher Education	Higher Education	Very good	2015-08-10	yes							Women	Bin es gewohnt, z.B. Verstand und Haende unabhaengig voneinander zu benutzen	no		yes	Angeboren, da Frauen sich traditionell bei der Versorgung der Familie auf mehrere Dinge gleichzeitig konzentrieren mussten	no
351	Germany	yes	no	yes	yes	yes	Male	36-45	>35	Germany	Germany					Ledig	Single	Single	0	techn. Angestellter	Diplom / Master	Graduate or professional degree	Higher Education	Higher Education	Poor	2015-02-04	yes							Women	tägliche Erfahrung	yes	Je mehr Tasks, desto schwerer wird es für Männer	no				yes	no	no
352	Germany	yes	yes		yes	yes	Female	46-55	>35	Germany	Germany					Verheiratet	Married/Partnership	Married/Partnership	0	Finanz Direktor	Studium (Uni/FH) OHNE Abschluß	Some college, no degree	Non-Higher Education	Non-Higher Education	Very good	2015-05-07	yes							Women	Erfahrung	no		no				yes	no	no
353	Germany	yes	yes		yes	yes	Male	26-35	<=35	Germany	Germany					Ledig	Single	Single	1	Geschäftsführer	Haupt-/Realschule	Less than high school	Non-Higher Education	Non-Higher Education	Good	2015-02-04	yes							Women	Die Erfahrung zeigt das es Frauen einfacher fällt sich auf mehrere Dinge gleichzeitig zu konzentrieren	yes	Mehrere Leichte aufgaben gehen besser parallel wie mehrere Schwere	yes	keine Ahnung	yes	Frauen ab 30 mit Kindern
354	Germany	no	no	no
355	Germany	yes	yes		yes	yes	Female	36-45	>35	Germany	Germany					Verheiratet	Married/Partnership	Married/Partnership	1	Selbstaendiger Consultant	Diplom / Master	Graduate or professional degree	Higher Education	Higher Education	Very good	2015-02-04	no	Ich kenne Beispiele fuer gute und schlechte Multi-Tasker beiderlei Geschlecht	no			no
356	Germany	yes	yes		yes	yes	Male	26-35	<=35	Germany	Germany					Ledig (noch nie verheiratet)	Single	Single		Elektronisches Publizieren, Layout-Programmierung im Verlagswesen	Diplom / Master	Graduate or professional degree	Higher Education	Higher Education	Very Poor	0	yes							Women	Frühzeitliche Prägung, daraus resultierende Veranlagung	no		yes	Frühzeitliche Prägung, daraus resultierende Veranlagung	no
357	Germany	yes	yes		yes	yes
358	Germany	yes	yes		yes	yes	Female	26-35	<=35	Germany	Germany					Zivile Partnerschaft	Married/Partnership	Married/Partnership	0	Software Developer	(Fach-)Abitur	High School	Non-Higher Education	Non-Higher Education	Very good	2015-05-07	yes							Women	Das Gehirn von Frauen zeigt in vielen Bereichen eine große Anzahl von Kontakten zwischen den Hirnhälften. Männer haben eher mehr Verbindungen innerhalb der Gehirnhälften.	no		no				yes	no	no
359	Germany	yes	no	no
360	Germany	yes	no	yes	yes	yes	Female	26-35	<=35	Germany	Germany					Ledig (noch nie verheiratet)	Single	Single	0	Stadtplaner	Diplom / Master	Graduate or professional degree	Higher Education	Higher Education	Good	1	yes							Women	genetisch	no		yes	Talent/ Uebung	no
361	Germany	yes	no	yes	yes	yes	Female	56-65	>35	Germany	Germany		36			Ledig	Single	Single	0	Consultant	Studium (Uni/FH) OHNE Abschluß	Some college, no degree	Non-Higher Education	Non-Higher Education	Average	2015-02-04	no	Ich glaube, es ist von Persönluchkeit nicht Geschlecht bestimmt	yes	Mancher ist flexibler, behält leichter den Überblick, als andere.	Flexibilität, Abstraktionsvermögen, Selbstvertrauen, gutes Gedächtnis, Kein Hang zur Panik, Zeitgefühl
362	Germany	no	yes		yes	yes	Female	26-35	<=35	Germany	Germany					Zivile Partnerschaft	Married/Partnership	Married/Partnership	0	Marketing Officer	Vordiplom / Bachelor	Bachelor's degree	Non-Higher Education	Non-Higher Education	Good	2015-02-04	yes							Women	Die Wurzeln liegen noch im Steinzeitalter: Während der Mann auf die Jagd (und sich damit immer nur auf ein Objekt konzentrieren) musste und Frauen dahingegend die Höhle und Feuer bewachen, Kind betreuen, Essen machen, aufpassen, dass kein Untier die Kinder angreift etc.	yes		no				yes	no	no
363	Germany	no	no	yes	yes	yes	Female	26-35	<=35	Germany	Germany					Verheiratet	Married/Partnership	Married/Partnership	2	Hausfrau und Mutter	Haupt-/Realschule	Less than high school	Non-Higher Education	Non-Higher Education	Good	10	yes							Women	Frauen muessen seit jeher Kinder und Haus/Job managen.	no		yes
364	Germany	yes	yes		yes	yes	Male	26-35	<=35	Germany	Germany					Ledig (noch nie verheiratet)	Single	Single	0	Angestellter	Studium (Uni/FH) OHNE Abschluß	Some college, no degree	Non-Higher Education	Non-Higher Education	Very good	2015-05-07	no	Das sind Geschlechterklischees.	yes	Multitasking ist konditionierbar.	In Wirklichkeit gibt es kein Multitasking, weil wir immer nur eine Sache gleichzeitig machen können. Gutes "Multitasking" ist die Fähigkeit, schnell zwischen verschiedenen Einzel-Tasks hin- und herschalten zu können. EIne Person ist ein guter Multitasker, wenn sie eine größere Anzahl solcher Tasks kontrollieren kann und jedem Task auch ein kontrolliertes Zeitfenster zuweisen kann.
365	Germany	yes	yes		yes	yes	Male	36-45	>35	Germany	Germany					Verheiratet	Married/Partnership	Married/Partnership	0	Freiberuflicher Übersetzer	Vordiplom / Bachelor	Bachelor's degree	Non-Higher Education	Non-Higher Education	Average	2015-05-07	no	Spiegelt nicht meine Erfahrung wider	yes	Manche Personen müssen sich gezielt auf eine Aufgabe konzentrieren können, andere wiederum brauchen sogar den ständigen Wechsel zwischen Aufgaben.	Muss sich schnell einarbeiten können und auch schnell wieder "abschalten" können (damit bei der nächsten Aufgabe, gar nicht mehr an die vorherige Aufgabe gedacht wird).
366	Germany	yes	yes		yes	yes
367	Germany	yes	no	no
368	Germany	yes	no	yes	yes	yes
369	Germany	yes	no	yes	yes	yes	Female	26-35	<=35	Germany	Germany					Zivile Partnerschaft	Married/Partnership	Married/Partnership	0	Angestellte Einkäuferin	Diplom / Master	Graduate or professional degree	Higher Education	Higher Education	Average	2015-02-04	yes							Women	Mehr Übung.	yes	Arbeit, Kind, Haushalt, Freizeit.	yes	Weil sie es öfter machenmüssen und mehr gefordert sind.	no
370	Germany	yes	yes		yes	yes	Male	46-55	>35	Germany	Germany					Getrennt lebend	Divorced	Married/Partnership	3	Rentner	Haupt-/Realschule	Less than high school	Non-Higher Education	Non-Higher Education	Very Poor	1	no	Frauen tun zwar oft mehrere Dinge nebeneiander, verlieren jedoch im ganzen an Systematik und Qualität . Letztlich ist das im Gesamten geleistete weniger als wären die Aufgaben sequenziell und auf einzelne Ziele hin abgearbeitet worden. Meine Partnerin putzt zwar alle Zimmer der Wohnung gleichzeitig, wenn ich putze tue ich dies eines nach dem anderen ohne abzuschweifen , bin schneller und gründlic…	no	Dies betrifft Personen welche darauf trainiert sind mehrere Aufgaben Parallel zu bewältigen. Dabei stellt sich die Frage ob diese sequenziell nicht Effektiver wären.		no		Women
371	Germany	yes	no	no
372	Germany	yes	yes		yes	yes	Female	46-55	>35	Germany	Germany					Verheiratet	Married/Partnership	Married/Partnership	1	Verwaltungsangestellte	(Fach-)Abitur	High School	Non-Higher Education	Non-Higher Education	Very good	2015-08-10	yes							Women
373	Germany	yes	yes		yes	yes	Male	36-45	>35	Germany	Germany					Ledig (noch nie verheiratet)	Single	Single	0	Diplom-Kaufmann	Diplom / Master	Graduate or professional degree	Higher Education	Higher Education	Poor	0	yes							Women
374	Germany	yes	yes		yes	yes	Male	18-25	<=35	Germany	Germany					Ledig	Single	Single	0	Arbeitssuchend	Haupt-/Realschule	Less than high school	Non-Higher Education	Non-Higher Education	Poor	1	yes							Women	Anerziehung, Instinkte	no		yes	Training, anerziehung	no
375	Germany	yes	yes		yes	yes	Female	46-55	>35	Germany	Germany					Verheiratet	Married/Partnership	Married/Partnership	0	Sekretariat/Sachbearbeiter	Studium (Uni/FH) OHNE Abschluß	Some college, no degree	Non-Higher Education	Non-Higher Education	Average	2015-02-04	yes							Women	Männer konzentrieren sich meiner Erfahrung nach tendenziell voll auf eine Sache, Frauen achten mehr auf ihre Umgebung	no		no				yes	no	no
376	Germany	yes	no	no
377	Germany	yes	no
378	Germany	yes	yes		yes	yes	Female	46-55	>35	Germany	Germany					Ledig (noch nie verheiratet)	Single	Single	0	Operations Technician	Diplom / Master	Graduate or professional degree	Higher Education	Higher Education	Very Poor	1	no	Personenabhaengig, nicht geschlechtsabhaengig	yes	Manche Menschen haben Talent dafuer, andere nicht	Sich nicht von einer Taetigkeit/einem Thema ablenken lassen, sondern Aufmerksamkeit gleichmaessig verteilen koennen
379	Germany	yes	yes		yes	yes
380	International	yes	yes		yes	yes	Male	18-25	<=35	Other	Other	India	UK		6 years	Single, never married	Single	Single	0	Managing Director MD	Bachelor's degree	Bachelor's degree	Non-Higher Education	Non-Higher Education	Good	2015-05-07	Yes							Women	they can do multiple things at the same time. I see them texting, working, listening to music and doing other chores simultaneously.	No		Yes	I think its genetic as they have had to always do multiple tasks together like maintaining the house, childcare and cooking while men had to do one thing at a time like hunting or protecting.	No
381	International	yes	yes		yes	yes	Female	26-35	<=35	Other	Other	Zimbabwe	UK		3 months	Single	Single	Single	0	student	Graduate or professional degree	Graduate or professional degree	Higher Education	Higher Education	Average	2015-02-04	Yes							Women	usually have a greater number of different tasks to complete	Yes		Yes	some women are better because they have a greater number of tasks that they have to do	Yes
382	International	yes	yes		yes	yes	Male	18-25	<=35	Other	Other	Brazil	UK		Less than a year	Single, never married	Single	Single	0	Student	Some college, no degree	Some college, no degree	Non-Higher Education	Higher Education	Good	2015-02-04	Yes							Women	Women tend to have more attention when they are doing some work, also, they have a 'good eye' for details and for jobs that require more concentration	Yes	Because you need to share your attention between all the tasks and so, if you have many tasks, you wouldn't be able to attend to all of them	Yes	Same reason that I stated before	No
383	International	yes	no	Yes	no	yes
384	International	yes	no	Yes	yes	yes	Female	26-35	<=35	Other	Other	Iran	UK		5	Married	Married/Partnership	Married/Partnership	0	Student	Graduate or professional degree	Graduate or professional degree	Higher Education	Higher Education	Average	2015-02-04	Yes							Women	I feel, I am a women	No		Yes	I can feel it.	No
385	International	yes	yes		yes	yes	Female	18-25	<=35	Other	Other	Armenia	UK		4 months	Single, never married	Single	Single		student	Bachelor's degree	Bachelor's degree	Non-Higher Education	Higher Education	Very Poor	1	No	Maybe they do, but I have seen both men and women who multitask quite effectively	Yes		practise
386	International	yes	no	Yes	yes	yes	Female	36-45	>35	Other	Other	Netherlands	SAME as place of birth		not applicable	Single	Single	Single	0	Product developer infant formula	Graduate or professional degree	Graduate or professional degree	Higher Education	Higher Education	Average	1	No	I think it is more dependent on training than on gender	No			No
387	International	no	no
388	International	yes	yes		yes	yes	Female	18-25	<=35	Other	Other	Brazil	UK		0 yet	Single, never married	Single	Single	0	Student full time	High school graduate (includes equivalency)	High School	Non-Higher Education	Non-Higher Education	Very Poor	2015-02-04	Yes							Women	I think they are more used to do it.	No		Yes	Because they are used to it	Yes	Because people are different and they can do things differently
389	International	yes	yes		yes	yes	Male	26-35	<=35	Other	Other	Italy		Switzerland	3	In a domestic partnership or civil union	Married/Partnership	Married/Partnership	0	PhD Student	Graduate or professional degree	Graduate or professional degree	Higher Education	Higher Education	Average	2015-02-04	Yes							Men												Because they are more rational and organized	No		No
390	International	yes	yes		yes	yes
391	International	yes	yes		yes	yes
392	International	yes	yes		yes	yes	Female	26-35	<=35	Other	Other	Malaysia	UK		8 months	Single	Single	Single	0	student	Graduate or professional degree	Graduate or professional degree	Higher Education	Higher Education	Average	2015-02-04	No	Equality	No			No
393	International	yes	no	Yes	yes	yes
394	International	yes	no	No
395	International	yes	yes		yes	yes	Male	18-25	<=35	Other	Other	Egypt	UK		3 years	Widowed	Widowed	Married/Partnership	0	student undergraduate	High school graduate (includes equivalency)	High School	Non-Higher Education	Non-Higher Education	Average	2015-02-04	Yes							Women	Women know how to think problems through better than men	Yes	Men might be able to handle the stress of small number of tasks rather than many that can be handled by women	No				No	Yes	Yes	Women who had children usually are better at multitasking then men
396	International	yes	yes		yes	yes	Female	18-25	<=35	UK	UK		SAME as place of birth		19	Single	Single	Single	0	Student	Some college, no degree	Some college, no degree	Non-Higher Education	Non-Higher Education	Average	1	No	Haven't had a chance to compare	Yes	Reactive people are better at multitasking	Ability to complete different tasks at the same time
397	International	yes	yes		yes	yes	Female	18-25	<=35	Germany	Germany		Germany		I was born in my current country of residence.	Single, never married	Single	Single	0	phd student, biomedical research	Graduate or professional degree	Graduate or professional degree	Higher Education	Higher Education	Extremely bad	1	Yes							Women	evolution made multitasking necessary for a woman's life	No		Yes	evolution	Yes	Mothers and women in Jobs who have to communicate a lot
398	International	yes	no	Yes	yes	yes	Female	18-25	<=35	Other	Other	Saudi Arabia	UK		3 months	Single, never married	Single	Single	0	Student	Bachelor's degree	Bachelor's degree	Non-Higher Education	Higher Education	Good	2015-05-07	No	Depends on personality, willingness to multi task and personal experience not gender	Yes		Do more than one thing effectively at once
399	International	yes	no	Yes	yes	yes	Female	18-25	<=35	Other	Other	Brazil	UK		1	Single, never married	Single	Single	0	student	Some college, no degree	Some college, no degree	Non-Higher Education	Non-Higher Education	Average	2015-02-04	No	Because they have the same pontencial	No			No
400	International	yes	yes		yes	yes	Female	26-35	<=35	Other	Other	Russia			27	In a domestic partnership or civil union	Married/Partnership	Married/Partnership	0	scientist	Ph.D.	Ph.D.	Higher Education	Higher Education	Poor	1	Yes							Women	natural gift	No		No				Yes	No	Yes
401	International	yes	no	Yes	yes	yes	Female	18-25	<=35	UK	UK		SAME as place of birth		NA	Single, never married	Single	Single	0	student	Bachelor's degree	Bachelor's degree	Non-Higher Education	Higher Education	Good	2015-05-07	No
402	International	yes	yes		yes	yes	Female	26-35	<=35	Other	Other	Russia			27	In a domestic partnership or civil union	Married/Partnership	Married/Partnership	0	scientist	Ph.D.	Ph.D.	Higher Education	Higher Education	Average	0	Yes
403	International	yes	yes		yes	yes	Female	18-25	<=35	Other	Other	Canada	SAME as place of birth		n/a	Single	Single	Single	0	Student	Bachelor's degree	Bachelor's degree	Non-Higher Education	Higher Education	Good	2015-02-04	No	Both men and women are good at multitasking but in different ways. In my experience, men are not any less good at multitasking than women, but women seem to be better at juggling many things because often they are placed into situations that demand it from them.	No			No
404	International	yes	yes		yes	yes	Female	18-25	<=35	Other	Other	China	UK		5	Single, never married	Single	Single	0	student	Graduate or professional degree	Graduate or professional degree	Higher Education	Higher Education	Good	2015-02-04	No	more depended on the tasks and how familiar you are with each of them	Yes	people who get on with computer games quickly	can be improved through practising on each individual tasks; but for new tasks more depend on natural ability of the brain
405	International	yes	yes		yes	yes	Female	18-25	<=35	Other	Other	Brazil	UK		3 months	Single, never married	Single	Single	0	Student	Bachelor's degree	Bachelor's degree	Non-Higher Education	Higher Education	Very good	2015-05-07	Yes							Women	From my previous experience	No		No				Yes	No	No
406	International	yes	yes		yes	yes	Female	26-35	<=35	Germany	Other		UK		6	Single, never married	Single	Single	0	phd student and support coordinator of supported living scheme	Graduate or professional degree	Graduate or professional degree	Higher Education	Higher Education	Good	2015-05-07	No	not a stereotype	Yes	who ever practices more
407	International	yes	yes		yes	yes	Female	18-25	<=35	Other	Other	Switzerland	SAME as place of birth		-	Single, never married	Single	Single	0	Student	Bachelor's degree	Bachelor's degree	Non-Higher Education	Higher Education	Good	2015-02-04	No	not everything can be caused by genderdifferences. The brain's adaptive and plastic, no matter of my gender	Yes	i think its learnable. so people who are used to it (like because they are born in a 1rd world, where multitasking is often required, they do it better than if they live on a farm in some village in some small 3rd world country.	if they can do several things at the same time but without impacts on the tasks at hand
408	International	no	no	No
409	International	yes	yes		yes	yes	Male	18-25	<=35	Other	Other	Netherlands	UK		2	Single, never married	Single	Single	0	Scientist	Bachelor's degree	Bachelor's degree	Non-Higher Education	Non-Higher Education	Average	2015-02-04	Yes							Women
410	International	no	no	No
411	Netherlands	yes	yes		yes	yes	female	26-35	<=35	Netherlands	Netherlands					In a domestic partnership or civil union	Married/Partnership	Married/Partnership	0	communication advisor	Master's degree	Master's degree	Non-Higher Education	Non-Higher Education	Average	2015-02-04	no	It is often said that women are better at multitasking, but I can't directly tell why	yes	I think intelligence is a factor that helps			I don't know what is meant with a specific form of multitasking
412	Netherlands	yes	yes		yes	yes	male	18-25	<=35	Netherlands	Netherlands		17-05-2036, 25 years			In a domestic partnership or civil union	Married/Partnership	Married/Partnership	0	Technical trainee at Liander	Master's degree	Master's degree	Non-Higher Education	Non-Higher Education	Very Good	2015-02-04	no	It has been said that woman are better at multitasking. However, my experience is that they might multitask more often, but also often mistakes are made. My friends and mother for example, burn the food while they are on the phone. I know it is not a good argument. My belief comes from my personal experience.	yes	I think when you do not have much stress in general in daily life, you can think more clearly which makes you capable of doing more things at the same time. Also, I believe there is a correlation with intelligence. If you are intelligence, some tasks just don't need much thinking which gives you more capacity to deal with other tasks.		yes	I think this question captures the same as the previous question. But it will be good to have some more detail here. Research has shown that for example gamers are better at multitasking. I used to game and often was part of a team and in the meantime also chatting with my team while gaming and reading articles online. What you notice it that some tasks go automatically and it becomes an automate…
413	Netherlands	yes	yes		yes	yes	male	18-25	<=35	Netherlands	Netherlands					In a domestic partnership or civil union	Married/Partnership	Married/Partnership	0	Student	Bachelor's degree	Bachelor's degree	Non-Higher Education	Non-Higher Education	Average	2015-02-04	no
414	Netherlands	yes	yes		yes	yes
415	Netherlands	yes	yes		yes	yes	female	26-35	<=35	Netherlands	Netherlands					Single	Single	Single	0	Medical researcher	Master's degree	Master's degree	Non-Higher Education	Non-Higher Education	Average	2015-02-04	yes							Women
416	Netherlands	yes	yes		yes	yes	male	18-25	<=35	Netherlands	Netherlands					Single	Single	Single	0	Production employer	High school graduate (includes equivalency)	High School	Non-Higher Education	Non-Higher Education	Good	2015-02-04	no	It's in your head. When you focus fully on the tasks you are doing, then you can fulfill your task and achieve your goals regardless of being a woman or a man.	no		Focusing on tasks
417	Netherlands	yes	yes		yes	yes	male	26-35	<=35	Netherlands	Netherlands					Single	Single	Single	0	Operations Research Analyst	Master's degree	Master's degree	Non-Higher Education	Non-Higher Education	Good	2015-02-04	yes							Women	I always hear that in my environment and in the news	yes		no	Actually, I have no idea, but maybe because previously had to pay more attention to danger than men while performing tasks.	no
418	Netherlands	yes	yes		yes	yes	female	18-25	<=35	Netherlands	Netherlands					Single	Single	Single	0	Animator	Professional Education/College; higher level education	Professional Education/College; higher level education	Higher Education	Higher Education	Average	2015-02-04	no	I think it is more person and character dependent than woman or man based.	yes	People who can concentrate well.		no		Women
419	Netherlands	yes	yes		yes	yes	female	26-35	<=35	Netherlands	Netherlands					Single, never married	Single	Single	0	analist	Master's degree	Master's degree	Non-Higher Education	Non-Higher Education	Good	2015-08-10	yes							Women	This is based on what everybody always says. But I also notice it in my environment, men have more trouble with it and rather first finish one thing before they start with something else.	yes	Probably most people can handle two tasks at the same time, more tasks is difficult for everyone, but often women remember better what they were doing.	yes				yes	no	no
420	Netherlands	yes	no	no
421	Netherlands	yes	yes		yes	yes	female	26-35	<=35	Netherlands	Netherlands					Single, never married	Single	Single	0	senior account executive	Master's degree	Master's degree	Non-Higher Education	Non-Higher Education	Average	2015-08-10	yes							Women	Common belief, actually I think we are all equally worse at it	yes		yes				yes	no	no
422	Netherlands	yes	yes		yes	yes	female	18-25	<=35	Netherlands	Netherlands								0	Student	Bachelor's degree	Bachelor's degree	Non-Higher Education	Higher Education	Poor	2015-02-04	yes							Women	When it is about small tasks, I notice that women can do more at the same time. If that is really efficient is a second point of discussion	no		yes				yes	no	no
423	Netherlands	yes	yes		yes	yes	male	18-25	<=35	Netherlands	Netherlands					In a domestic partnership or civil union	Married/Partnership	Married/Partnership	0	process consultant	Master's degree	Master's degree	Non-Higher Education	Non-Higher Education	Good	2015-02-04	no	In my environment, I don't see differences, the same education etc.	yes	It will be partly genetically determined so those people will be better at it.		yes
424	Netherlands	yes	no	no
425	Netherlands	yes	yes		yes	yes	female	26-35	<=35	Netherlands	Netherlands					Single, never married	Single	Single	0	PhD student	Master's degree	Master's degree	Non-Higher Education	Non-Higher Education	Good	2015-05-07	no	I think multitasking can't be explained biologically or genetically, but that it is more dependent on certain characteristics which both men and women can have.	yes	People who are trained in it (work etc)		yes	Somethings are easier to combine than others (e.g. things you have experience with)
426	Netherlands	yes	yes		yes	yes	female	18-25	<=35	Netherlands	Netherlands					In a domestic partnership or civil union	Married/Partnership	Married/Partnership		PhD student chemistry	Master's degree	Master's degree	Non-Higher Education	Non-Higher Education	Poor	1	yes							Women	public opinion	yes		yes				yes	no	yes	Yes, probably there is a specific type of woman that is better in multitasking than other women. I don't know which type.
427	Netherlands	yes	yes		yes	yes	female	18-25	<=35	Netherlands	Netherlands		N/A			Single	Single	Single	0	Student	High school graduate (includes equivalency)	High School	Non-Higher Education	Higher Education	Average	2015-02-04	no	Because several research has been done. One research shows that woman are better in multitasking and the other research shows the reverse. Thus, I believe that there are not many differences between men and women, but that it is subject dependent.	yes	I think people with a concentration problem, like ADD or ADHD are less good at multitasking.	Practice	no
428	Netherlands	yes	no	yes	yes	yes	female	18-25	<=35	Netherlands	Netherlands					Single, never married	Single	Single	0	-	High school graduate (includes equivalency)	High School	Non-Higher Education	Non-Higher Education	Poor	2015-02-04	yes							Women	Men can better focus, meaning they are very concentrated on one thing. They fully go for this one thing and can't do more things at the same time.	yes		yes				yes	no	yes	Caring types and strange enough, alpha women
429	Netherlands	yes	yes		yes	yes	female	18-25	<=35	Netherlands	Netherlands					Married	Married/Partnership	Married/Partnership	0	Chemistry Teacher	Master's degree	Master's degree	Non-Higher Education	Non-Higher Education	Average	2015-05-07	no	A lot of professions ask for multitasking and these can be done by both men and women, but maybe in a different way	no		Alertness, the possibility to switch quickly between different tasks or events
430	Netherlands	yes	yes		yes	yes	female	26-35	<=35	Netherlands	Netherlands					In a domestic partnership or civil union	Married/Partnership	Married/Partnership	0	office manager / senior learning office assistant	Master's degree	Master's degree	Non-Higher Education	Non-Higher Education	Average	2015-02-04	yes							Women	Women can better keep the overview?	yes	Men are better at performing more tasks	no	They are better at keeping the overview?	no
431	Netherlands	yes	yes		yes	yes	male	18-25	<=35	Netherlands	Netherlands									student	Bachelor's degree	Bachelor's degree	Non-Higher Education	Higher Education	Good	1	yes							Women	Public opinion which is probably proven somewhere	no		no
432	Netherlands	yes	yes		yes	yes	female	26-35	<=35	Netherlands	Netherlands					In a domestic partnership or civil union	Married/Partnership	Married/Partnership		physiotherapist	Professional Education/College	Professional Education/College	Higher Education	Higher Education	Good	2015-02-04	no	It depends on the job and if you're often asked to do so.	yes	I think that people with a higher IQ and EG are better		yes	They are better with the forms they have experience with
433	Netherlands	yes	yes		yes	yes	male	36-45	>35	Netherlands	Netherlands					Divorced	Divorced	Married/Partnership	2	Teacher	Professional Education/College	Professional Education/College	Higher Education	Higher Education	Good	2015-02-04	no	In my opinion it is not gender dependent, but it depends on the development of the brain.	yes	People who are versatile, flexible and can handle stress are better		yes	Because they can make priorities
434	Netherlands	yes	yes		yes	yes	female	18-25	<=35	Netherlands	Netherlands					Single, never married	Single	Single	0	Software Engineer	Master's degree	Master's degree	Non-Higher Education	Non-Higher Education	Poor	2015-02-04	yes							Women	Women can faster switch between multiple tasks	no		no	I once heard the comparison that women's brain are like a ball of whool where everything is connected to each other. That seems handy with multitasking, because rather than doing more tasks at the same time, it is the fast switching.	yes
435	Netherlands	yes	no	no
436	Netherlands	yes	yes		yes	yes	female	26-35	<=35	Netherlands	Netherlands					In a domestic partnership or civil union	Married/Partnership	Married/Partnership			Master's degree	Master's degree	Non-Higher Education	Non-Higher Education	Good	2015-02-04	yes							Women	I think women can better keep the overview on several processes, because that's a characteristic of them like mothers.	no		yes				yes	no	no
437	Netherlands	yes	yes		yes	yes	male	18-25	<=35	Netherlands	Netherlands					Single, never married	Single	Single	0	student	Bachelor's degree	Bachelor's degree	Non-Higher Education	Higher Education	Extremely bad	0	no	I think nobody is good at multitasking, but that some people are better (and become better by practice)	no		Practice, concentration/focus capabilities			Women
438	Netherlands	yes	yes		yes	yes	male	26-35	<=35	Netherlands	Netherlands					In a domestic partnership or civil union	Married/Partnership	Married/Partnership	0	PhD student	Master's degree	Master's degree	Non-Higher Education	Non-Higher Education	Average	2015-02-04	no	Because intelligence and practice will have a bigger influence than gender	yes	People who can digest information quickly		yes	The thing they have practice with; the multitasking things they do daily
439	Netherlands	yes	yes		yes	yes	female	18-25	<=35	Netherlands	Netherlands					Single, never married	Single	Single	0	Student	Bachelor's degree	Bachelor's degree	Non-Higher Education	Higher Education	Extremely bad	2015-02-04	yes							Women	No idea	yes	The more tasks, the more difficult it becomes	no	I don't know why. But men absolutely can't do it	yes	Women who practice a lot
440	Netherlands	yes	yes		yes	yes	male	26-35	<=35	Netherlands	Netherlands					Single, never married	Single	Single	0	Student	Bachelor's degree	Bachelor's degree	Non-Higher Education	Higher Education	Good	2015-02-04	no	I think the differences are more subject dependent and not gender dependent.	yes	Parents		yes	Attention to a child and a task next to it
441	Netherlands	yes	yes		yes	yes	female	18-25	<=35	Netherlands	Netherlands					Single	Single	Single	0	Student	MBO	MBO	Higher Education	Higher Education	Average	2015-08-10	yes							Women	I don't really have a specific reason for it	no		no	Because men and women have specific characteristics and I think women possess this characteristic more/better, for example men are often faster and stronger physically.	yes	I think that you can develop it (unconsciously)
442	Netherlands	yes	yes		yes	yes	male	26-35	<=35	Netherlands	Netherlands					Single, never married	Single	Single	0	projectmanager	Master's degree	Master's degree	Non-Higher Education	Non-Higher Education	Average	2015-05-07	no	I think it is more dependent on training	yes	More practice		yes	e.g. people who have to multitask as lot for their work	Women	was
443	Netherlands	yes	yes		yes	yes	male	26-35	<=35	Netherlands	Netherlands					In a domestic partnership or civil union	Married/Partnership	Married/Partnership	0	IT Auditor	Master's degree	Master's degree	Non-Higher Education	Non-Higher Education	Average	2015-02-04	yes							Women	That's what is always said. Next to it: talking and 'something else'	no		no	That's what always is said. Next to this: talking and 'some other task'	yes	Higher IQ
444	Netherlands	yes	yes		yes	yes	female	18-25	<=35	Netherlands	Netherlands					Single	Single	Single	0	Student	High school graduate (includes equivalency)	High School	Non-Higher Education	Higher Education	Average	2015-02-04	yes							Women	Because men are more focused on the practical issue which means being busy with only one thing and not with multiple things.	no		yes				yes	no	no
445	Netherlands	yes	yes		yes	yes	female	26-35	<=35	Netherlands	Netherlands					Single, never married	Single	Single	0	Mailman	Bachelor's degree	Bachelor's degree	Non-Higher Education	Non-Higher Education	Good	2015-02-04	no	Because I often see men that perform the same.	yes	People who do that a lot in their work or study		yes	Things that are related to the job they are doing
446	Netherlands	yes	yes		yes	yes	male	26-35	<=35	Netherlands	Netherlands					Single, never married	Single	Single	0	Chemical Safety Consultant	Master's degree	Master's degree	Non-Higher Education	Non-Higher Education	Very Good	2015-02-04	yes							Men												I think you really apply multitasking only in extreme situations, like computer games or air traffic controllor. These jobs are more often performed by men than women.	no		yes
447	Netherlands	yes	yes		yes	yes	female	26-35	<=35	Netherlands	Netherlands					Divorced	Divorced	Married/Partnership	0	Policy Advisor Facilities	Professional Education/College	Professional Education/College	Higher Education	Higher Education	Average	2015-05-07	yes							Women	Can switch faster.	yes	The more tasks, the more difficult it becomes	yes				yes	no	no
448	Netherlands	yes	no	yes	yes	yes	female	26-35	<=35	Netherlands	Netherlands					Married	Married/Partnership	Married/Partnership	1	Training&Development Specialist	Bachelor's degree	Bachelor's degree	Non-Higher Education	Non-Higher Education	Very Good	2015-08-10	yes							Women	Because from evolution and development (women are mothers) they are more mandatory to multitask	no		yes				yes	no	yes	It certainly has to do something with the level of education and the type of person
449	Netherlands	yes	yes		yes	yes	male	26-35	<=35	Netherlands	Netherlands					Single, never married	Single	Single	0	Student	Bachelor's degree	Bachelor's degree	Non-Higher Education	Higher Education	Poor	2015-02-04	no	I think you can train that, so the level is equal for men and women	no		Performing multiple tasks at the same time and perform them well			Women	You see more often that
450	Netherlands	yes	yes		yes	yes	female	18-25	<=35	Other	Germany		6			In a domestic partnership or civil union	Married/Partnership	Married/Partnership	0	PhD candidate	Master's degree	Master's degree	Non-Higher Education	Non-Higher Education	Very Good	2015-02-04	no	You can practice it, so in the end everybody can be at the same level of multitasking	yes	Not a specific group, just some people are better than others		no
451	Netherlands	no	no	yes	yes	yes	male	18-25	<=35	Netherlands	Netherlands					Single, never married	Single	Single		Student	Bachelor's degree	Bachelor's degree	Non-Higher Education	Higher Education	Poor	2015-05-07	no	We don't differ that much	no		Quickly pay attention to something
452	Netherlands	yes	yes		yes	yes	female	26-35	<=35	Netherlands	Netherlands					Single, never married	Single	Single	0	Nurse	MBO	MBO	Higher Education	Higher Education	Average	2015-05-07	yes							Women	Men just can't do two things at the same time	yes	See next question	yes				yes	no	no
453	Netherlands	no	yes		yes	yes	female	18-25	<=35	Netherlands	Netherlands					Single	Single	Single	0	Projectcoordinator	Master's degree	Master's degree	Non-Higher Education	Non-Higher Education	Good	2015-08-10	yes							Women	Women can focus on multiple things at the same time. Why? Brain hemispheres which behave differently from each other?	yes	The more complex, the worse the performance	yes				yes	no	no
454	Netherlands	yes	yes		yes	yes	female	18-25	<=35	Netherlands	Netherlands					In a domestic partnership or civil union	Married/Partnership	Married/Partnership	0	Student	MBO	MBO	Higher Education	Higher Education	Average	10	no	I conclude that from what I see	yes	People who are quick learners		no
455	Netherlands	yes	yes		yes	yes	female	18-25	<=35	Netherlands	Netherlands					Single, never married	Single	Single	0	Speech therapist. bachelor of health	Professional Education/College	Professional Education/College	Higher Education	Higher Education	Average	2015-05-07	yes							Women	Women are better in this. They have more control over doing two things at the same time. It probably has something to do with the brains.	no		no	Men and women's brain are not developed the same way?	no
456	Netherlands	no	yes
457	Netherlands	yes	yes		yes	yes	male	26-35	<=35	Netherlands	Netherlands					In a domestic partnership or civil union	Married/Partnership	Married/Partnership	0	PhD student	Master's degree	Master's degree	Non-Higher Education	Non-Higher Education	Average	2015-02-04	yes							Men
458	Netherlands	yes	yes		yes	yes	male	18-25	<=35	Netherlands	Netherlands					Single	Single	Single	0	Bachelorstudent	High school graduate (includes equivalency)	High School	Non-Higher Education	Non-Higher Education	Average	2015-02-04	yes							Women	They plan in advance and therefore they are more conscious in reaching their targets and therefore they can do multiple tasks at the same time. On the other hand, men are more focused on the short term.	yes		no	They plan more in advance and therefore more conscious on getting their targets and therefore can do multiple tasks at the same time, whole men are often more focused on the short-term	no
459	Netherlands	yes	yes		yes	yes	female	18-25	<=35	Netherlands	Netherlands					Single, never married	Single	Single	0	PhD student	Master's degree	Master's degree	Non-Higher Education	Non-Higher Education	Good	1	yes							Women	Maybe due to a better focus or concentration	no		no	Betere focus en concentratie	yes	Women who need it, I think that you improve it when you practice more. So it is difficult to name a specific type
460	Netherlands	yes	yes		yes	yes	female	26-35	<=35	Netherlands	Netherlands					Single, never married	Single	Single	0	PhD student	Master's degree	Master's degree	Non-Higher Education	Non-Higher Education	Good	2015-02-04	no	It has more to do with how handy you are. I know men and women who are good at multitasking, but also women and men who can't do it.	no		Spread your attention but at the same time keep the overview
461	Netherlands	yes	no
462	Netherlands	yes	yes		yes	yes	male	18-25	<=35	Netherlands	Netherlands					Single, never married	Single	Single	0	student	Bachelor's degree	Bachelor's degree	Non-Higher Education	Higher Education	Good	2015-02-04	no	Because there is not a lot of difference between the capabilities of men and women. A big part is just the public view. As long as you practice multitasking, everybody should be able to do it, maybe someone is better than someone else.	yes	People who multitask more often will be more practiced than people who perform it less often		yes	It depends what you are used to multitask with
463	Netherlands	yes	yes		yes	yes	male	over 65	>35	Netherlands	Netherlands					In a domestic partnership or civil union	Married/Partnership	Married/Partnership	2		MBO	MBO	Higher Education	Higher Education	Good	1	yes							Men
464	Netherlands	yes	yes		yes	yes	male	36-45	>35	Netherlands	Netherlands					Married	Married/Partnership	Married/Partnership	2	Facility Manager	Professional Education/College	Professional Education/College	Higher Education	Higher Education	Average	2015-02-04	no	I think that both genders have a different view on tackling it/approaching it.	yes	People who work according to their own processes and work along the same lines for everything. Those people can better combine several tasks because they can better structure the different processing steps. This is in contrast with people that are more spontaneous or ad hoc!		no
465	Netherlands	yes	no	yes	yes	yes	female	56-65	>35	Netherlands	Netherlands					In a domestic partnership or civil union	Married/Partnership	Married/Partnership		HR consultant	Professional Education/College	Professional Education/College	Higher Education	Higher Education	Poor	2015-02-04	yes							Women	Can do more things at the same time	yes	Men are slower	yes				yes	no	yes	It depends on age and education
466	Netherlands	yes	yes		yes	yes	male	18-25	<=35	Netherlands	Netherlands					Single, never married	Single	Single	0	Doctor	Master's degree	Master's degree	Non-Higher Education	Non-Higher Education	Average	2015-02-04	yes							Women	Women seem to be able to faster switch between tasks, what is very essential in multitasking.	yes	The difference becomes bigger with the number of tasks.	no	See before.	no
467	Netherlands	yes	yes		yes	yes	male	18-25	<=35	Netherlands	Netherlands					Single, never married	Single	Single	0	Student, BSc	Bachelor's degree	Bachelor's degree	Non-Higher Education	Non-Higher Education	Average	2015-02-04	yes							Men												In general better at doing tasks with only half of the attention. I have the idea that women who multitask rather perform the task chaotic or careless	no		yes
468	Netherlands	yes	yes		yes	yes	male	18-25	<=35	Netherlands	Netherlands					Single, never married	Single	Single		Student Natural Sciences	Bachelor's degree	Bachelor's degree	Non-Higher Education	Non-Higher Education	Poor	2015-02-04	no	I think that this is an old-fashioned opinion and that the differenecs are minimum.	yes	People who are above average intelligence and who do not have an autistism disorder		yes	Yes, for actions that are somehow already automated and rely on experience, like reading maps and talking at the same time.
469	Netherlands	yes	yes		yes	yes	male	26-35	<=35	Netherlands	Netherlands					Single, never married	Single	Single			High school graduate (includes equivalency)	High School	Non-Higher Education	Non-Higher Education	Good	2015-02-04	yes							Women	On average they are less inclined to extrme focus, which means they can switch faster	no		no	same question	yes	As far as you can speak about 'types'. Multitasking is a skill and therefore certrain groups of people, for instance by more training or with a different neurophysiology are better at this.
470	Netherlands	yes	yes		yes	yes	female	18-25	<=35	Netherlands	Netherlands					Single	Single	Single	0	student	High school graduate (includes equivalency)	High School	Non-Higher Education	Higher Education	Poor	1	no
471	Netherlands	yes	yes		yes	yes	male	18-25	<=35	Netherlands	Netherlands					Single	Single	Single	0	Student	High school graduate (includes equivalency)	High School	Non-Higher Education	Higher Education	Poor	2015-02-04	yes							Women	That's what always has been said, so I believe it. But I have to say that I notice myself that I can't multitask (can't focus on two things at the same time). However, my girlfriend is really better at that.	no		yes				no	no	no
472	Netherlands	no	yes
473	Netherlands	yes	yes		yes	yes	male	18-25	<=35	Netherlands	Netherlands					Single, never married	Single	Single	0	Intern HRM	High school graduate (includes equivalency)	High School	Non-Higher Education	Non-Higher Education	Poor	1	no	I once read a message that women can faster switch between two tasks, and so they can't really multitask.	no		A lot of practice, but maybe also predispose plays a role
474	Netherlands	yes	yes		yes	yes	female	56-65	>35	Netherlands	Netherlands					Married	Married/Partnership	Married/Partnership	2	Teacher	Professional Education/College	Professional Education/College	Higher Education	Higher Education	Average	2015-02-04	no	Depends on the person and not on the gender	yes	People who are good and fast at organizing		no		Women	Women are more willing to do multiple things at the same time. Men focus on one topic	yes	Women are busy with multiple tasks and want, to keep things going, to often finish more often.	yes				no	yes	yes	Women who have to organize a lot of things
475	Netherlands	yes	yes		yes	yes	female	18-25	<=35	Netherlands	Netherlands					Married	Married/Partnership	Married/Partnership							Extremely bad	1	yes							Men												ddddd	yes		no
476	Netherlands	yes	yes		yes	yes	female	26-35	<=35	Netherlands	Netherlands					Single	Single	Single	0	PhD student	Master's degree	Master's degree	Non-Higher Education	Non-Higher Education	Average	1	no	I am very skeptical regarding the statement that women are better at multitasking. As fas as I know this has not been proved scientifically, or there are contradictory findings in the literature.	yes	I can't name a specific type of people that is good at multitasking. I think that a spectrum of people exist that are kind of successfull at multitasking		yes	Maybe, but again I think that a spectrum consists. I don't know if there is a categorisation for different forms of multitasking. Maybe multitasking is not properly defined?
477	Netherlands	no	no	yes
478	Netherlands	yes	yes		yes	yes	female	26-35	<=35	Netherlands	Netherlands					In a domestic partnership or civil union	Married/Partnership	Married/Partnership		Pedagogical staff	Professional Education/College	Professional Education/College	Higher Education	Higher Education	Good	2015-05-07	yes							Women
479	Netherlands	yes	yes		yes	yes	female	26-35	<=35	Netherlands	Netherlands					Single, never married	Single	Single	0	PhD student	Master's degree	Master's degree	Non-Higher Education	Non-Higher Education	Good	2015-02-04	yes							Women	They do it more often and therefore practice this 'talent'. They probably also have to use it more often. Men focus their attention often only on one thing and therefore don't learn to multitask	yes	If you do the laundry and cooking dinner at the same time, then you automatically multitask?	no	They have to do it more often and therefore learn it more/better.	yes
480	Netherlands	no	yes		yes	yes	female	26-35	<=35	Netherlands	Netherlands					In a domestic partnership or civil union	Married/Partnership	Married/Partnership	0	Software tester	Master's degree	Master's degree	Non-Higher Education	Non-Higher Education	Good	2015-02-04	yes							Women	Women can faster switch between tasks due to the connections in their brain	yes	Men can probably still do two things at the same time…	no	Women can faster switch between tasks due to the connections in their brain.	yes	It will differ per person, same with everything else; you can be good or bad at it
481	Netherlands	yes	yes		yes	yes	female	26-35	<=35	US	Netherlands		17			In a domestic partnership or civil union	Married/Partnership	Married/Partnership	0	PhD student	Master's degree	Master's degree	Non-Higher Education	Non-Higher Education	Average	2015-02-04	no
482	Netherlands	no	no	no
483	Netherlands	yes	yes		yes	yes	female	26-35	<=35	Netherlands	Netherlands					Single, never married	Single	Single	0	Unemployed	Professional Education/College	Professional Education/College	Higher Education	Higher Education	Extremely bad	2015-05-07	no	I don't think it is gender dependent, but more dependent on personal characteristics.	yes	People who are not stressed quickly		no
484	Netherlands	yes	yes		yes	yes	male	26-35	<=35	Netherlands	Netherlands					In a domestic partnership or civil union	Married/Partnership	Married/Partnership	0	carpenter	MBO	MBO	Higher Education	Higher Education	Poor	2015-02-04	no	No comment	no
485	Netherlands	yes	yes		yes	yes	female	18-25	<=35	Netherlands	Netherlands					Single	Single	Single	0	Student	Bachelor's degree	Bachelor's degree	Non-Higher Education	Higher Education	Average	2015-02-04	yes							Women	Women more often do the householding activities and take care of the kids, therefore they are more confronted with multitasking and are better able to developt this.	yes	Multitasking becomes easier when the tasks that have to be performed are tasks that are often performed or that require less concentration. Women are used to a different type of tasks compared to men.	yes				no	yes	no
486	Netherlands	yes	yes		yes	yes	male	26-35	<=35	Netherlands	Netherlands					Single	Single	Single	0	Phd student	Master's degree	Master's degree	Non-Higher Education	Non-Higher Education	Average	2015-02-04	yes							Women	Experience that men are bad at it	no		no	The experience that men are bad at it.	no
487	Netherlands	yes	yes		yes	yes	female	26-35	<=35	Netherlands	Netherlands					Single, never married	Single	Single	0	student	Bachelor's degree	Bachelor's degree	Non-Higher Education	Non-Higher Education	Average	2015-02-04	yes							Women	Women are better anyway	yes		yes				yes	no	no
488	Netherlands	yes	no	yes	yes	yes	female	26-35	<=35	Netherlands	Netherlands					In a domestic partnership or civil union	Married/Partnership	Married/Partnership	0	Educational staff	Master's degree	Master's degree	Non-Higher Education	Non-Higher Education	Poor	2015-05-07	yes							Women	Everybody says that women can more things at the same time and that men have to focus on one thing at the time.	no		yes				yes	no	no
489	Netherlands	yes	no	no
490	Netherlands	yes	yes		yes	yes	male	18-25	<=35	Netherlands	Netherlands					Single	Single	Single	0	trainee technical sciences	Master's degree	Master's degree	Non-Higher Education	Non-Higher Education	Average	0	no	I think that real multitasking doesn't exist, but only a form of combining an automatic program with something else, but convincingly thinking about two things at the same time I think is not possible. So it depends on your definition of multitasking.	yes			yes
491	Netherlands	no	yes		yes	yes	male	18-25	<=35	Netherlands	Netherlands					In a domestic partnership or civil union	Married/Partnership	Married/Partnership	0	Student	Bachelor's degree	Bachelor's degree	Non-Higher Education	Higher Education	Average	2015-02-04	yes							Women	Because they can better coordinate/organize themselves.	no		no	Because they can better coordinate themselves	no
492	Netherlands	yes	yes		yes	yes	female	18-25	<=35	Netherlands	Netherlands					Single, never married	Single	Single	0	SAP Consultant	Master's degree	Master's degree	Non-Higher Education	Non-Higher Education	Good	2015-02-04	yes							Women	They are more used to do multiple things at the same time (work, kids, household)	no		yes				yes	no	yes	Due to genetics
493	Netherlands	yes	yes		yes	yes	female	18-25	<=35	Netherlands	Netherlands					Single, never married	Single	Single	0	Tutor	Master's degree	Master's degree	Non-Higher Education	Non-Higher Education	Good	2015-02-04	no	It depends on the person and not on the gender whether they can multitask	yes	People who are organized		no
494	Netherlands	yes	yes		yes	yes	male	18-25	<=35	Netherlands	Netherlands					Single	Single	Single	0	Treasury operations manager	Professional Education/College	Professional Education/College	Higher Education	Higher Education	Good	2015-05-07	yes							Women	Due to general perception	no		no	Because men are often more busy with a single complex task. I see a higher focus with men while women often are busy with multiple things at the same time.	yes	Women active in a companyculture show more often a practical form of multitasking
495	Netherlands	yes	yes		yes	yes	female	56-65	>35	Netherlands	Netherlands					Married	Married/Partnership	Married/Partnership	1	houswife	Less than high school	Less than high school	Non-Higher Education	Non-Higher Education	Average	2015-02-04	yes							Women	No idea	no		yes				no	no	no
496	Netherlands	yes	yes
497	Netherlands	yes	yes		yes	yes	female	26-35	<=35	Netherlands	Netherlands					Single	Single	Single	0	Personal assistant	Master's degree	Master's degree	Non-Higher Education	Non-Higher Education	Good	2015-02-04	yes							Women	They can be occupied with several things at the same time	no		yes				yes	no	no
498	Netherlands	yes	yes		yes	yes	male	26-35	<=35	Netherlands	Netherlands					Single	Single	Single	0	Analytical Scientist	Master's degree	Master's degree	Non-Higher Education	Non-Higher Education	Average	1	no	I think that you can practice this partly. It could be that women or men are occupied with different things.	yes	People who have to do it for their job		yes	Areas on which they work a lot upon (partly routine)
499	Netherlands	no	yes		yes	yes	female	26-35	<=35	Netherlands	Netherlands					Single, never married	Single	Single	0	user experience engineer	Master's degree	Master's degree	Non-Higher Education	Non-Higher Education	Poor	2015-02-04	yes							Women	They are programmed to be a mother which requires to multitask often	no		yes				yes	no	yes	One of the tasks has to go automatically. Some people just don't have this skill
500	Netherlands	yes	yes		yes	yes	female	18-25	<=35	Netherlands	Netherlands					Single, never married	Single	Single	0	administrative assisant	Professional Education/College	Professional Education/College	Higher Education	Higher Education	Good	2015-02-04	yes							Women	I sometimes notice that	yes	2 things: not a lot of difference between men/women. More things: women are better	no	I think so, because I sometimes notice that. If you mean what is the reason that women are better? I have no idea, maybe they have a talent for it	no
501	Netherlands	yes	yes		yes	yes	male	18-25	<=35	Netherlands	Netherlands					Married	Married/Partnership	Married/Partnership	1	Salesperson	Professional Education/College	Professional Education/College	Higher Education	Higher Education	Average	2015-08-10	yes							Women	They have more patience	no		no	They are more calm in difficult situations	no
502	Netherlands	yes	yes		yes	yes	female	26-35	<=35	Netherlands	Netherlands					Single, never married	Single	Single	0	PhD student	Master's degree	Master's degree	Non-Higher Education	Non-Higher Education	Good	2015-05-07	no
503	Netherlands	yes	yes		yes	yes	male	56-65	>35	Netherlands	Netherlands					Married	Married/Partnership	Married/Partnership	2	asset manager	Professional Education/College	Professional Education/College	Higher Education	Higher Education	Average	2015-02-04	yes							Women	It's in the genes	yes	typical woman tasks or men tasks	yes				no	no	no
504	Netherlands	no	yes		yes	yes	female	26-35	<=35	Netherlands	Netherlands					Single, never married	Single	Single		phd student	Master's degree	Master's degree	Non-Higher Education	Non-Higher Education	Good	2015-05-07	yes							Women	Traditionally they are more used to it, they watch the kids, cook and in the meantime iron or something else	no		yes				no	no	no
505	Netherlands	yes	yes		yes	yes	male	26-35	<=35	Netherlands	Netherlands					Single	Single	Single	0	Support assistant	Master's degree	Master's degree	Non-Higher Education	Non-Higher Education	Good	2015-05-07	no	It is more dependent on individual compotences, gender is not relevant.	yes	People who can handle stress since they have to keep a good overview		no
506	Netherlands	yes	yes		yes	yes	male	26-35	<=35	Netherlands	Netherlands					Single	Single	Single	0	straler	MBO	MBO	Higher Education	Higher Education	Good	10	no	Everybody is different	yes	People who do this daily		no
507	Netherlands	yes	yes		yes	yes	female	18-25	<=35	Netherlands	Netherlands					Single, never married	Single	Single	0	Searching for work (doctor)	Master's degree	Master's degree	Non-Higher Education	Non-Higher Education	Average	2015-05-07	yes							Women	They are used to be busy with several things at the same time	yes	In particular with a lot of different tasks	no	They are more used being busy with multiple things at the same time.	yes	Women who are more trained in keeping the overview
508	Netherlands	yes	yes		no	yes
509	Netherlands	yes	yes		yes	yes	female	26-35	<=35	Netherlands	Netherlands					In a domestic partnership or civil union	Married/Partnership	Married/Partnership	0	functional manager	Master's degree	Master's degree	Non-Higher Education	Non-Higher Education	Average	2015-02-04	no	I think they are both bad at it	no		Spread attention in a good way between multiple tasks
510	Netherlands	yes	yes		yes	yes	female	18-25	<=35	Netherlands	Netherlands					Single, never married	Single	Single	0	Student					Good	2015-02-04	yes							Women	That's what is always said			yes				yes	no	no
511	Netherlands	yes	yes		yes	yes	female	18-25	<=35	Netherlands	Netherlands					Single, never married	Single	Single	0	Occupational therapist	Professional Education/College	Professional Education/College	Higher Education	Higher Education	Average	2015-05-07	yes							Women	Woman are capable in doing multiple things at the same time.	no		no	Women can plan multiple activities at the same time and also actually execute these.	no
512	Netherlands	yes	yes		yes	yes	male	over 65	>35	Netherlands	Netherlands					Married	Married/Partnership	Married/Partnership	1	Retired	MBO	MBO	Higher Education	Higher Education	Extremely bad	0	yes							Women	I have read this before	no		no	Because something in the brain works differently.	no
513	Netherlands	yes	yes		yes	yes	female	18-25	<=35	Netherlands	Netherlands					Single, never married	Single	Single	0		Bachelor's degree	Bachelor's degree	Non-Higher Education	Non-Higher Education	Average	2015-02-04	yes							Women	From my experience, woman can be occupied with multiple things at the same time, while men can only focus on one thing.	no		no	Women are different in the way they are built, they are often more disciplined	no
514	Netherlands	yes	yes		yes	yes	female	18-25	<=35	Netherlands	Netherlands					In a domestic partnership or civil union	Married/Partnership	Married/Partnership	0	financial consultant	Professional Education/College	Professional Education/College	Higher Education	Higher Education	Average	2015-02-04	yes							Women	From evolution, women benefit more from multitasking	yes	The gender difference will become null with more tasks	yes				yes	no	no
515	Netherlands	yes	yes		yes	yes	female	26-35	<=35	Netherlands	Netherlands					Single	Single	Single	0	Application engineer	Master's degree	Master's degree	Non-Higher Education	Non-Higher Education	Average	2015-02-04	yes							Women	From traditionally speaking: women had to combine multiple tasks; while men were more focused on one task.	no		yes				yes	no	no
516	Netherlands	yes	yes
517	Netherlands	yes	yes		yes	yes	female	26-35	<=35	Netherlands	Netherlands					In a domestic partnership or civil union	Married/Partnership	Married/Partnership	0	Research - and teaching assistant	Master's degree	Master's degree	Non-Higher Education	Non-Higher Education	Very Good	2015-05-07	no	I don't think so	yes	I can't describe a certain type, but I think this accounts for all activities, some people are better than others		yes	probably
518	Netherlands	yes	yes		yes	yes	male	18-25	<=35	Netherlands	Netherlands					Single, never married	Single	Single	0	Student	Bachelor's degree	Bachelor's degree	Non-Higher Education	Higher Education	Very Good	2015-05-07	yes							Women	In my opinion multitasking has to do with the creation of a structure: time management. I think that in general men like to first finish something before moving on to the next task, a goal-focused approach. Women are more often busy with multiple things to use time more efficient and maybe miss a certain structure. Although I realise that I am aware that this is based on a bias and doesn't accoun…	yes		no	As I said in the previous answer I think this has to do with efficiency (keeping the overview in a chaotic structure) or not seeing a structure and just perform the tasks that are there.	no
519	Netherlands	no	yes		yes	yes	female	18-25	<=35	Netherlands	Netherlands					Single, never married	Single	Single		Student	High school graduate (includes equivalency)	High School	Non-Higher Education	Higher Education	Good	2015-02-04	yes							Women	Experience/what people say/general knowledge. Also when you look at evolution; men had to focus on one task: hunting. Women had to collect, look around while they also were taking care of the kids.		I don't understand the question	yes				yes	no	no
520	Netherlands	yes	yes		yes	yes	male	26-35	<=35	Netherlands	Netherlands					In a domestic partnership or civil union	Married/Partnership	Married/Partnership	0	student	High school graduate (includes equivalency)	High School	Non-Higher Education	Non-Higher Education	Good	2015-05-07	yes							Women
521	Netherlands	yes	yes		yes	yes	female	18-25	<=35	Netherlands	Netherlands					In a domestic partnership or civil union	Married/Partnership	Married/Partnership	0	Student in Nursery	Professional Education/College	Professional Education/College	Higher Education	Higher Education	Good	2015-02-04	yes							Women
522	Netherlands	yes	yes		yes	yes	female	26-35	<=35	Netherlands	Netherlands					In a domestic partnership or civil union	Married/Partnership	Married/Partnership	0	PhD student	Master's degree	Master's degree	Non-Higher Education	Non-Higher Education	Good	2015-05-07	no	I think that's a myth	yes	People who can quickly switch between different activities are better at multitasking. But it also depends on the definition of multitasking. When do you call something multitasking?		yes	Fast switching between activities
523	Netherlands	yes	yes		yes	yes	male	18-25	<=35	Netherlands	Netherlands								0	student science	Bachelor's degree	Bachelor's degree	Non-Higher Education	Non-Higher Education	Average	2015-02-04	no	I don't see a valid argument why to assume that there are gender differences. Women are sometimes mentioned to be better multitaskers, but I haven't seen evidence or conformation for this in practice.	no
524	Netherlands	yes	yes		yes	yes	male	26-35	<=35	Netherlands	Netherlands					In a domestic partnership or civil union	Married/Partnership	Married/Partnership	0	Information Analist / Designer	Professional Education/College	Professional Education/College	Higher Education	Higher Education	Average	2015-02-04	no	I think multitasking is more related to the division of attention. I don't think there is a significant difference between men and women.	yes	Personen die noodzakelijkerwijs moeten multitasken zullen hier waarschijnlijk ook beter in zijn dan personen die zich op één specifieke taak moeten richten.		no
525	Netherlands	no	yes		yes	yes
526	Turkey	no	no
527	Turkey	no	no
528	Turkey	no	yes
529	Turkey	yes	no	yes	yes	yes	female	18-25	<=35	US	Turkey		22			Single, Never Married	Single	Single		Student	Bachelor's degree	Bachelor's degree	Non-Higher Education	Higher Education	good	2015-02-04	no	Everybody should has equal task sharing	yes	I think people who can use computers very efficient they can be very good on multitasking		yes	The people who are specialist at using compters
530	Turkey	yes	yes		yes	yes	male	56-65	>35	Turkey	Turkey					Married	Married/Partnership	Married/Partnership	2	Teacher	Bachelor's degree	Bachelor's degree	Non-Higher Education	Non-Higher Education	Average	2015-02-04	yes							Women	because their nature is suitale for multiasking	no		yes				yes	yes	yes	if she is married and have children she will be bettter at multitasking
531	Turkey	yes	no	no
532	Turkey	yes	yes		yes	yes	male	18-25	<=35	Turkey	Turkey					Single	Single	Single		Network	Bachelor's degree	Bachelor's degree	Non-Higher Education	Non-Higher Education	good	2015-02-04	no	Different ideas create good products	yes	Different personalities can be good		yes
533	Turkey	yes	no	no
534	Turkey	yes	no	no
535	Turkey	no	no
536	Turkey	yes	yes		yes	yes	male	56-65	>35	Turkey	Turkey					Married	Married/Partnership	Married/Partnership	2	Teacher	Bachelor's degree	Bachelor's degree	Non-Higher Education	Non-Higher Education	Average	2015-02-04	yes							Women	because they are more sensitive and patient	no		yes				yes	no	no
537	Turkey	yes	yes		yes	yes	male	46-55	>35	Turkey	Turkey					Married	Married/Partnership	Married/Partnership	3	Teacher	Bachelor's degree	Bachelor's degree	Non-Higher Education	Non-Higher Education	good	2015-02-04	no	I think it is related to personal abilities and education	yes	individual differences		yes	leadership, becoming patient, time of attention are important advantageus
538	Turkey	yes	yes		yes	yes	male	46-55	>35	Turkey	Turkey					Married	Married/Partnership	Married/Partnership	2	Teacher	Bachelor's degree	Bachelor's degree	Non-Higher Education	Non-Higher Education	good	10	no	Everybody can do every thing	yes			no
539	Turkey	yes	yes		yes	yes	male	46-55	>35	Turkey	Turkey					Married	Married/Partnership	Married/Partnership	3		Bachelor's degree	Bachelor's degree	Non-Higher Education	Non-Higher Education	good	2015-02-04	no	I think Educational talents plays a pivotal role	yes			yes
540	Turkey	yes	yes		yes	yes	male	46-55	>35	Turkey	Turkey					Married	Married/Partnership	Married/Partnership	3	Teacher	PhD	PhD	Higher Education	Higher Education	good	2015-02-04	yes							Men												they are more affective in daily life	yes		yes
541	Turkey	yes	yes
542	Turkey	yes	yes		yes	yes	male	over 65	>35	Turkey	Turkey					Married	Married/Partnership	Married/Partnership	4	Retired	High school graduate (includes equivalency)	High School	Non-Higher Education	Non-Higher Education	Average	2015-05-07	yes							Women	because they do a lot of works such as house works, child care	no		yes				yes	no	no
543	Turkey	yes	yes		yes	yes	male	46-55	>35	Turkey	Turkey					Married	Married/Partnership	Married/Partnership	2	Finance Administrator	Bachelor's degree	Bachelor's degree	Non-Higher Education	Non-Higher Education	very good	2015-08-10	yes							Men												males can do their works better than females	no	when number of tasks increase females cannot do it	yes
544	Turkey	yes	yes		yes	yes	male	36-45	>35	Turkey	Turkey					Married	Married/Partnership	Married/Partnership	2	Teacher	Bachelor's degree	Bachelor's degree	Non-Higher Education	Non-Higher Education	good	2015-05-07	yes							Men												because they are more active and they do house works	yes		yes
545	Turkey	yes	yes		yes	yes		18-25	<=35	Turkey	Turkey					Single	Single	Single			Some college, no degree	Some college, no degree	Non-Higher Education	Non-Higher Education	good	2015-02-04	yes							Women	because they take it very seriously when there is a work	yes	yes because as number of tasks increase females gets tired	yes				yes	no	yes	some women are very lazy and touchy but mothers are excellent at multitasking.
546	Turkey	yes	no	no
547	Turkey	yes	yes		yes	yes	male	56-65	>35	Turkey	Turkey					Married	Married/Partnership	Married/Partnership	5	tradesman	Less than high school	Less than high school	Non-Higher Education	Non-Higher Education	very good	2015-08-10	yes							Men												their nature is more suitable for that	yes		yes
548	Turkey	yes	yes		yes	yes	female	18-25	<=35	Turkey	Turkey					Single	Single	Single			Some college, no degree	Some college, no degree	Non-Higher Education	Non-Higher Education	Average	2015-02-04	no	Because we can not evaluate individuals in gender differences we should asses their ability in the point of being a human	yes	specific types of people knows how to do it so they perform properly		yes
549	Turkey	yes	yes		yes	yes	female	56-65	>35	Turkey	Turkey					Married	Married/Partnership	Married/Partnership	11		Less than high school	Less than high school	Non-Higher Education	Non-Higher Education	good	2015-05-07	yes							Women	because they are mothers, first teachers and they responsible from family. Also, they do some works outside of house too.	yes	yes they usually face multitasking works	yes				yes	no	no
550	Turkey	yes	yes		yes	yes	female	36-45	>35	Turkey	Turkey					Single	Single	Single			Some college, no degree	Some college, no degree	Non-Higher Education	Non-Higher Education	Very Poor	2015-02-04	yes							Men													no		yes
551	Turkey	no	no
552	Turkey	yes	no	yes	yes	yes	male	26-35	<=35	Turkey	Turkey					Single, Never Married	Single	Single			Graduate or professional degree	Graduate or professional degree	Higher Education	Higher Education	good	2015-05-07	yes							Men												because of nature and nurture	yes		yes
553	Turkey	yes	no	yes
554	Turkey	yes	no	no
555	Turkey	yes	yes
556	Turkey	yes	yes		yes	yes	male	26-35	<=35	Turkey	Turkey					Single, Never Married	Single	Single			Graduate or professional degree	Graduate or professional degree	Higher Education	Higher Education	Average	1	yes							Men												males deal with more works than females	yes	males have more works to do in different fields than females	yes
557	Turkey	yes	yes		yes	yes	male	26-35	<=35	Turkey	Turkey					Single, Never Married	Single	Single			Bachelor's degree	Bachelor's degree	Non-Higher Education	Non-Higher Education	good	2015-02-04	yes							Men												because males are phsically stronger than females	yes	males have alo of works to do in daily life	yes
558	Turkey	yes	no	no
559	Turkey	yes	yes		yes	yes	female	26-35	<=35	Turkey	Turkey					Married	Married/Partnership	Married/Partnership			Bachelor's degree	Bachelor's degree	Non-Higher Education	Non-Higher Education	Average	2015-02-04	yes							Women	because they are doing more than one work each time	no		yes				no	no	no
560	Turkey	no	no
561	Turkey	yes	no	no
562	Turkey	yes	no	yes	yes	yes	male	18-25	<=35	Turkey	Turkey					Single, Never Married	Single	Single			Some college, no degree	Some college, no degree	Non-Higher Education	Non-Higher Education	Average	2015-05-07	yes							Women	because piblic is interested in women	no		yes				no	yes	no
563	Turkey	no	no
564	Turkey	no	yes
565	Turkey	yes	yes		yes	yes	male	26-35	<=35	Turkey	Turkey					Single, Never Married	Single	Single		plumber	High school graduate (includes equivalency)	High School	Non-Higher Education	Non-Higher Education	Excellent	2015-08-10	no	if you think on driving a car while you speak and smoke, this can be done by men too and also there are multitasking examples for females	yes	people who have a good comprehension and attention can be good on multitasking		no
566	Turkey	yes	yes		yes	yes	male	18-25	<=35	Turkey	Turkey					Single, Never Married	Single	Single			Bachelor's degree	Bachelor's degree	Non-Higher Education	Non-Higher Education	Average	1	yes							Women	because they have much more works every day	yes	because our society is paternalistic and this cause more works for female therefore they are better at multitasking	yes				yes	no	no
567	Turkey	yes	yes		yes	yes	male	26-35	<=35	Turkey	Turkey					Married	Married/Partnership	Married/Partnership	0	math Teacheri	Bachelor's degree	Bachelor's degree	Non-Higher Education	Non-Higher Education	very good	1	yes							Women	because they are taking it easy	yes	because females do a lot of routin works in daily life so some of these work are done simultaneously. Females get used to do multitasking	yes				yes	no	yes	multitasking is a latent skill with all ladies if they don’t use this skill it will reduce
568	Turkey	yes	no	no
569	Turkey	yes	yes		yes	yes	male	26-35	<=35	Turkey	Turkey					Single	Single	Single		psikolojik danışman	Bachelor's degree	Bachelor's degree	Non-Higher Education	Non-Higher Education	Average	2015-02-04	no	Varoluşsal olarak bir fark olmamasi nedeniyle. Because there is no differences existentially	yes	The people who has leadership features can be very good at multitasking		yes	Because they are effective at menagement, orientation and development
570	Turkey	yes	yes		yes	yes	female	18-25	<=35	Turkey	Turkey					Single, Never Married	Single	Single		Teacher	Bachelor's degree	Bachelor's degree	Non-Higher Education	Non-Higher Education	Average	2015-02-04	yes							Women	females are involving in multitasking a lot than males	no		yes				yes	no	no
571	Turkey	yes	yes		yes	yes	male	26-35	<=35	Turkey	Turkey					Single	Single	Single		Teacher	Bachelor's degree	Bachelor's degree	Non-Higher Education	Non-Higher Education	very good	2015-02-04	yes							Men												because males are nor emotional so they can perform their works better than females	yes		yes
572	Turkey	yes	yes		yes	yes	male	26-35	<=35	Turkey	Turkey					Married	Married/Partnership	Married/Partnership	0	Student	High school graduate (includes equivalency)	High School	Non-Higher Education	Higher Education	good	2015-02-04	yes							Women	females are involving in multitasking a lot than males	no		yes				yes	no	yes	because of individual differences some females might be more talented at multitasking
573	Turkey	yes	yes		yes	yes	male	26-35	<=35	Turkey	Turkey					Single, Never Married	Single	Single		Fizyoterapist	Graduate or professional degree	Graduate or professional degree	Higher Education	Higher Education	Average	1	no	I think females are intellectually less functional than males	no		intelligence
574	Turkey	yes	yes		yes	yes	male	26-35	<=35	Turkey	Turkey					Single	Single	Single		İşsiz	Graduate or professional degree	Graduate or professional degree	Higher Education	Higher Education	good	2015-08-10	yes							Men
575	Turkey	yes	yes		yes	yes	male	46-55	>35	Turkey	Turkey					Married	Married/Partnership	Married/Partnership	5		Bachelor's degree	Bachelor's degree	Non-Higher Education	Non-Higher Education	good	2015-02-04	yes							Men												because they are naturally more incline to multitasking	yes		yes
576	Turkey	yes	yes		yes	yes	male	18-25	<=35	Turkey	Turkey					Single	Single	Single		Student	Some college, no degree	Some college, no degree	Non-Higher Education	Higher Education	good	2015-02-04	yes							Men												because males are more succesfull and decisive than females	yes		no
577	Turkey	yes	yes		yes	yes	male	18-25	<=35	Turkey	Turkey					Single, Never Married	Single	Single			Bachelor's degree	Bachelor's degree	Non-Higher Education	Non-Higher Education	very good	2015-05-07	yes							Men												they are stronger	yes		yes
578	Turkey	yes	no	yes	yes	yes	male	26-35	<=35	Turkey	Turkey					Single, Never Married	Single	Single		Teacher	Graduate or professional degree	Graduate or professional degree	Higher Education	Higher Education	Average	1	yes							Men												because of houseworks	yes		no
579	Turkey	yes	yes		yes	yes
580	Turkey	yes	yes		yes	yes	male	26-35	<=35	Turkey	Turkey					Married	Married/Partnership	Married/Partnership			Graduate or professional degree	Graduate or professional degree	Higher Education	Higher Education	Average	2015-02-04	no	I think there isnot differences in genders otherwise it would prevent specialisation	no		intelligence and knowlegde
581	Turkey	yes	yes		yes	yes
582	Turkey	yes	no	yes	yes	yes	female	18-25	<=35	Turkey	Turkey					Single	Single	Single			Some college, no degree	Some college, no degree	Non-Higher Education	Non-Higher Education	very good	2015-02-04	yes							Women	females fulfill their works that they are responsible very good	no		yes				yes	no	yes	it depends they experience
583	Turkey	yes	yes		yes	yes	male	18-25	<=35	Turkey	Turkey					Married	Married/Partnership	Married/Partnership	1	tekstile	High school graduate (includes equivalency)	High School	Non-Higher Education	Non-Higher Education	good	2015-08-10	yes							Men												they are stronger	yes		no
584	Turkey	yes	yes		yes	yes	female	18-25	<=35	Turkey	Turkey		21			Single	Single	Single	0	tekstile	Less than high school	Less than high school	Non-Higher Education	Non-Higher Education	good	2015-08-10	yes							Men
585	Turkey	yes	yes		yes	no
586	Turkey	no	no	no
587	Turkey	yes	yes		yes	yes	female	18-25	<=35	Turkey	Turkey														Excellent	2015-02-04	no	I believe they can do	no		achievment
588	Turkey	yes	yes		yes	yes	male	18-25	<=35	Turkey	Turkey					Married	Married/Partnership	Married/Partnership		Teacher	Bachelor's degree	Bachelor's degree	Non-Higher Education	Non-Higher Education	very good	2015-02-04	yes							Men												because males are better and females are emotional so they can not deal with multtasking works.	yes		yes
589	Turkey	yes	yes		yes	yes	female	18-25	<=35	Turkey	Turkey					Married	Married/Partnership	Married/Partnership			High school graduate (includes equivalency)	High School	Non-Higher Education	Non-Higher Education	good	1	yes							Women	because I think so	yes		yes				yes	yes	no	yes
590	Turkey	yes	no	no
591	Turkey	yes	no	no
592	Turkey	yes	no
593	Turkey	yes	no	no
594	Turkey	yes	no	no
595	Turkey	yes	yes		yes	yes	female	18-25	<=35	Turkey	Turkey					Single, Never Married	Single	Single			Bachelor's degree	Bachelor's degree	Non-Higher Education	Non-Higher Education	very good	2015-08-10	no	because both males and females have distinct advantages	yes	The people who has leadership features can be very good at multitasking		yes
596	Turkey	yes	no	no
597	Turkey	yes	no	no
598	Turkey	yes	yes		yes	yes	female	18-25	<=35	Turkey	Turkey					Single, Never Married	Single	Single	0	Student	Some college, no degree	Some college, no degree	Non-Higher Education	Higher Education	good	2015-02-04	no	because everything depends on human not gender	yes	if your personality incline to this works you are very good on multitasking		yes
599	Turkey	yes	no	no
600	Turkey	yes	yes		yes	yes	male	26-35	<=35	Turkey	Turkey					Single, Never Married	Single	Single		Teacher	Bachelor's degree	Bachelor's degree	Non-Higher Education	Non-Higher Education	good	2015-02-04	yes							Women	It is my observation	no		yes				no	no	yes	they she has children she will be better at multi tasking
601	Turkey	yes	yes		yes	yes	male	46-55	>35	Turkey	Turkey					Seperated	Divorced	Married/Partnership	1	Economist	PhD	PhD	Higher Education	Higher Education	Average	1	no
602	Turkey	yes	no	yes	yes	yes	female	46-55	>35	Turkey	Turkey					In a domestic partnership or civil union	Married/Partnership	Married/Partnership	0	interpreter	PhD	PhD	Higher Education	Higher Education	very good	2015-08-10	yes							Women	ther nature is more suitable	yes	because when the number of tasks increase males get tired but females are familiar so they are more suitable for multitasking	yes				yes	no	no
603	Turkey	yes	no	yes	yes	yes	male	26-35	<=35	Turkey	Turkey					Married	Married/Partnership	Married/Partnership	0	draftsman	Bachelor's degree	Bachelor's degree	Non-Higher Education	Non-Higher Education	good	2015-02-04	yes							Men
604	Turkey	yes	no	no
605	Turkey	yes	yes		yes	yes	female	36-45	>35	Turkey	Turkey					Divorced	Divorced	Married/Partnership	3	Reader at University	Graduate or professional degree	Graduate or professional degree	Higher Education	Higher Education	good	2015-05-07	no	I think abilities don’t depend on genders	yes	Talent, intelligence, education and environmental factors help some people become very good at multitasking		yes	In addition to the previous features that I mentioned, individual diffrences also important
606	Turkey	yes	yes		yes	yes	male	26-35	<=35	Turkey	Turkey					Married	Married/Partnership	Married/Partnership	1	Academics	Graduate or professional degree	Graduate or professional degree	Higher Education	Higher Education	very good	2015-02-04	no	if there is a work here, everybody should involve	yes	the people who do their works with enthusiasms they are very good at multitasking		yes	task-sharing
607	Turkey	yes	yes		yes	yes	female	26-35	<=35	Turkey	Turkey					Single, Never Married	Single	Single		Teacher	Bachelor's degree	Bachelor's degree	Non-Higher Education	Non-Higher Education	good	2015-02-04	yes							Women	Because females can focus on more than one task at a time	no		no	I think it is because of females intelligence and practice	no
608	Turkey	yes	yes		yes	yes	male	36-45	>35	Turkey	Turkey					Divorced	Divorced	Married/Partnership	2	ogretim uyesi	PhD	PhD	Higher Education	Higher Education	good	2015-02-04	yes							Women	they have much mre responsiobilities	no		yes				yes	no	no
609	Turkey	yes	no	no
610	Turkey	yes	no	yes	yes	yes	female	26-35	<=35	Turkey	Turkey					Married	Married/Partnership	Married/Partnership		psychologist	Graduate or professional degree	Graduate or professional degree	Higher Education	Higher Education	good	2015-02-04	no
611	Turkey	yes	yes		yes	yes	male	26-35	<=35	Turkey	Turkey					Single, Never Married	Single	Single			Bachelor's degree	Bachelor's degree	Non-Higher Education	Non-Higher Education	Average	2015-02-04	yes							Men												El	yes		yes
612	Turkey	yes	yes		yes	yes	male	18-25	<=35	Turkey	Turkey					Single, Never Married	Single	Single		Student	High school graduate (includes equivalency)	High School	Non-Higher Education	Higher Education	Average	2015-02-04	yes							Women	females can do works compatibly with other works	no		yes				yes	no	no
613	Turkey	yes	no	no
614	Turkey	yes	yes		yes	yes
615	Turkey	yes	no	no
616	Turkey	no	yes		yes	yes	male	18-25	<=35	Turkey	Turkey					Single	Single	Single			Bachelor's degree	Bachelor's degree	Non-Higher Education	Non-Higher Education	Average	2015-08-10	yes							Men
617	Turkey	yes	yes		yes	yes	female	18-25	<=35	Turkey	Turkey		24			Single	Single	Single		bankmand	Bachelor's degree	Bachelor's degree	Non-Higher Education	Non-Higher Education	very good	2015-02-04	yes							Women	they are more attentive, careful and meticulous	no		yes				yes	no	no
618	Turkey	yes	yes		yes	yes	female	26-35	<=35	Turkey	Turkey					Single, Never Married	Single	Single		Teacher	Bachelor's degree	Bachelor's degree	Non-Higher Education	Non-Higher Education	good	2015-05-07	yes							Women	because total works that I women should do in a day is more than a men work because females have to do child care, house works and outside works. This works cannot be done one by one in a day so they have to do more than one work in same time.	yes	because female have to give a birth, take are of baby, do houseworks and job but males just do a job.	yes				yes	no	yes	All females are better at multitasking, we cannot say certain types of females are better because I observed even females who are lower at multitasking are better than males.
619	Turkey	yes	yes		yes	yes	female	26-35	<=35	Turkey	Turkey					Single, Never Married	Single	Single		Teacher	Bachelor's degree	Bachelor's degree	Non-Higher Education	Non-Higher Education	Average	1	no	because there is no difference in their intelligence and muscle developments	no		practice
620	Turkey	yes	no	no
621	Turkey	yes	no	no
622	Turkey	yes	yes		yes	yes	female	18-25	<=35	Turkey	Turkey					Single	Single	Single			High school graduate (includes equivalency)	High School	Non-Higher Education	Non-Higher Education	good	2015-02-04	no	there is equal time for both genders and they created equally	no		concentration			Men
623	Turkey	yes	yes		yes	yes	male	26-35	<=35	Turkey	Turkey		28			Single, Never Married	Single	Single		Teacher	Bachelor's degree	Bachelor's degree	Non-Higher Education	Non-Higher Education	good	2015-02-04	no	gender differences is not important everybody can do it	yes	the people who has responsibilities are better at multitasking		yes	people who have responsibilities
624	Turkey	yes	yes		yes	yes	male	26-35	<=35	Turkey	Turkey					Single, Never Married	Single	Single		Teacher	Bachelor's degree	Bachelor's degree	Non-Higher Education	Non-Higher Education	good	1	yes							Men
625	Turkey	yes	no	no
626	Turkey	yes	no	no
627	Turkey	yes	no	no
628	Turkey	yes	no	no
629	Turkey	yes	yes		yes	yes	female	18-25	<=35	Turkey	Turkey					In a domestic partnership or civil union	Married/Partnership	Married/Partnership	0	research assistant	Graduate or professional degree	Graduate or professional degree	Higher Education	Higher Education	very good	10	yes							Women	to be honest, i dont think genders differ in multi tasking but you only present two options male and female so I chose female otherwise I am not agree with gender discrimantion.çok alakalıdır.	no		no	I don’t think so	no
630	Turkey	yes	no	no
631	Turkey	yes	no	no
632	Turkey	yes	no	yes	yes	yes	female	46-55	>35	Turkey	Turkey					Married	Married/Partnership	Married/Partnership	2	dentist	Graduate or professional degree	Graduate or professional degree	Higher Education	Higher Education	good	2015-02-04	no	it depends some factors beside gender differences	yes	the people who are intelligence and energetic		no
633	Turkey	no	no	no
634	Turkey	yes	no	no
635	Turkey	yes	no	yes	yes	yes	female	26-35	<=35	Turkey	Turkey					Married	Married/Partnership	Married/Partnership	1	Doctor	PhD	PhD	Higher Education	Higher Education	Very Poor	1	no	in this age, both males and females become same	no		ability
636	Turkey	yes	yes		yes	yes	male	26-35	<=35	Turkey	Turkey					Married	Married/Partnership	Married/Partnership	0	Teacher	Bachelor's degree	Bachelor's degree	Non-Higher Education	Non-Higher Education	good	2015-02-04	yes							Men												because they have more oportunities to do multitasking	yes		no
637	Turkey	yes	yes
638	Turkey	yes	no	no
639	Turkey	yes	no	no
640	Turkey	yes	yes		yes	yes	male	26-35	<=35	Turkey	Turkey					Single, Never Married	Single	Single		Student	Graduate or professional degree	Graduate or professional degree	Higher Education	Higher Education	good	10	yes							Women	this is because of female nature	no		yes				yes	no	yes	in addition to thei nature , environmental factors also effect their performance at multitasking
641	Turkey	yes	no	no
642	Turkey	yes	yes		yes	yes	male	26-35	<=35	Turkey	Turkey		25			Single, Never Married	Single	Single	0	Academic	Graduate or professional degree	Graduate or professional degree	Higher Education	Higher Education	very good	2015-05-07	no	because education is important	yes	The people who has good enough experinece		yes	because the become specialist at multitasking, I mean experience and practice
643	Turkey	yes	no	no
644	Turkey	yes	yes		yes	yes	male	18-25	<=35	Turkey	Turkey					Single, Never Married	Single	Single		Student	Bachelor's degree	Bachelor's degree	Non-Higher Education	Non-Higher Education	good	2015-02-04	no	İnsanların kendine ait özellikleri var çoklu görevlerde herkes aynı anda birden çok görev yapabilmektedir individuals have unique features so all of them can fulfill multitasks	no		ability
645	Turkey	yes	yes		yes	yes	female	26-35	<=35	Turkey	Turkey					Single, Never Married	Single	Single		Teacher	Graduate or professional degree	Graduate or professional degree	Higher Education	Higher Education	good	2015-02-04	no	I think it is related to personality rather than gender diffrences	yes	the people who are good in time menagement and who has multiple intelligence		yes	people who can use multiple intelligence
646	Turkey	yes	no	no
647	Turkey	yes	yes		yes	yes	female	18-25	<=35	Turkey	Turkey					Married	Married/Partnership	Married/Partnership	2		High school graduate (includes equivalency)	High School	Non-Higher Education	Non-Higher Education	very good	2015-08-10	yes							Women	House works, child care, job etc..	no		yes				yes	no	no
648	Turkey	yes	no	no
649	Turkey	yes	yes		yes	yes	male	26-35	<=35	Turkey	Turkey					Married	Married/Partnership	Married/Partnership	2	Teacher	Bachelor's degree	Bachelor's degree	Non-Higher Education	Non-Higher Education	very good	1	yes							Men												I think females are less attentive than males	no		yes
650	Turkey	yes	no	no
651	Turkey	yes	yes		yes	yes	male	18-25	<=35	Turkey	Turkey					Single	Single	Single			Some college, no degree	Some college, no degree	Non-Higher Education	Non-Higher Education	very good	2015-02-04	yes							Men												Because of nature males are more suitable for multitasking, females are sensitive and emotional so they can not be better than males	no		yes
652	Turkey	yes	no	yes	yes	yes	female	26-35	<=35	Turkey	Turkey					Married	Married/Partnership	Married/Partnership	0	Soldier	Graduate or professional degree	Graduate or professional degree	Higher Education	Higher Education	poor	2015-05-07	yes							Women	I think they have this ability	no		yes				yes	no	no
653	Turkey	yes	no	no
654	Turkey	yes	no	no
655	Turkey	yes	no	no
656	Turkey	yes	no	no
657	Turkey	yes	yes		yes	yes	male	36-45	>35	Turkey	Turkey					Married	Married/Partnership	Married/Partnership	2		Graduate or professional degree	Graduate or professional degree	Higher Education	Higher Education	good	2015-05-07	yes							Women	they are faster than males	yes		yes				yes	no	no
658	Turkey	yes	no	no
659	Turkey	yes	no	no
660	Turkey	yes	yes		yes	yes	female	26-35	<=35	Turkey	Turkey					Single	Single	Single		Teacher	Graduate or professional degree	Graduate or professional degree	Higher Education	Higher Education	very good	2015-05-07	yes							Men												because of nature	yes		yes
661	Turkey	yes	no	no
662	Turkey	yes	no	no
663	Turkey	yes	no	no
664	Turkey	yes	no	yes	yes	yes
665	Turkey	yes	no	no
666	Turkey	yes	no	yes	yes	yes	male	36-45	>35	Turkey	Turkey					Married	Married/Partnership	Married/Partnership	1	Teacher	Bachelor's degree	Bachelor's degree	Non-Higher Education	Non-Higher Education	Average	2015-05-07	yes							Men												because of nature	yes		yes
667	Turkey	yes	yes		yes	yes	male	26-35	<=35	Turkey	Turkey					Married	Married/Partnership	Married/Partnership	2	Teacher	Bachelor's degree	Bachelor's degree	Non-Higher Education	Non-Higher Education	good	2015-02-04	yes							Women	this is because of their nature	yes		yes				yes	yes	yes
668	Turkey	yes	no	no
669	Turkey	yes	yes		yes	yes	female	26-35	<=35	Turkey	Turkey					Married	Married/Partnership	Married/Partnership	0	architect	Graduate or professional degree	Graduate or professional degree	Higher Education	Higher Education	Excellent	10	yes							Women	for example they have to do house works, child care, job. doing all those works need good enough intelligence and pyschological capacity.	yes	males are more logical and analitical than females therefore if there is a limited number of tasks they would be more better than females. however, females are more intuitive and reflexive but they are better at multitasking when numbers of tasks increse	yes				yes	no	yes	Yes of course, genetic inclination, intelligence, educational level sociocultural factors will affect their performance at multi tasking
670	Turkey	yes	yes		yes	yes	female	18-25	<=35	Turkey	Turkey					Single, Never Married	Single	Single			Bachelor's degree	Bachelor's degree	Non-Higher Education	Non-Higher Education	good	2015-02-04	no	overall, they have similar responsibilities	no					Women	because in the society they shoulder more responsibilities than males	no		yes				yes	no	no
671	Turkey	yes	yes		yes	yes	male	26-35	<=35	Turkey	Turkey					Single	Single	Single			Bachelor's degree	Bachelor's degree	Non-Higher Education	Non-Higher Education	Excellent	2015-05-07	yes							Men												because they have ability	yes		yes
672	Turkey	yes	yes
673	Turkey	yes	yes		yes	yes	female	18-25	<=35	Turkey	Turkey					Single, Never Married	Single	Single		nurse	Bachelor's degree	Bachelor's degree	Non-Higher Education	Non-Higher Education	good	2015-05-07	yes							Men												because they are stable and calm	yes		yes
674	Turkey	yes	no	no
675	Turkey	yes	yes		yes	yes	male	18-25	<=35	Turkey	Turkey					Single, Never Married	Single	Single			Bachelor's degree	Bachelor's degree	Non-Higher Education	Non-Higher Education	good	2015-02-04	no	they can deal with multitasking at same ratio	yes	yes		yes	yes
676	Turkey	yes	yes		yes	yes	male	36-45	>35	Turkey	Turkey					Married	Married/Partnership	Married/Partnership	3	Teacher	Bachelor's degree	Bachelor's degree	Non-Higher Education	Non-Higher Education	good	2015-02-04	yes							Men												actually it depends individual differences	no		no
677	Turkey	yes	no
678	Turkey	yes	yes		yes	yes	female	18-25	<=35	Turkey	Turkey					Single, Never Married	Single	Single		Teacher	Bachelor's degree	Bachelor's degree	Non-Higher Education	Non-Higher Education	Very Poor	2015-02-04	yes							Men												because they are stable and calm	yes		yes
679	Turkey	yes	no	no
680	Turkey	yes	yes		yes	yes	male	18-25	<=35	Turkey	Turkey					Single	Single	Single			Some college, no degree	Some college, no degree	Non-Higher Education	Non-Higher Education	Average	2015-02-04	yes							Men												because they are stronger and, talented	yes		yes
681	Turkey	no	no	no
682	Turkey	no	no	no
683	Turkey	yes	yes		no	yes
684	Turkey	yes	no	no
685	Turkey	no	no	no
686	Turkey	yes	no	no
687	Turkey	yes	no	no
688	Turkey	yes	yes		yes	yes	male	18-25	<=35	Turkey	Turkey					Single, Never Married	Single	Single			Bachelor's degree	Bachelor's degree	Non-Higher Education	Non-Higher Education	good	2015-02-04	yes							Men												because they can think sophisticated and multidirectional	yes		yes
689	Turkey	yes	no	no
690	Turkey	yes	yes		yes	yes	male	26-35	<=35	Turkey	Turkey					Married	Married/Partnership	Married/Partnership	2	Teacher	Bachelor's degree	Bachelor's degree	Non-Higher Education	Non-Higher Education	good	2015-02-04	no	Because in my life there are a lot of males and females who are good at multitasking	yes	the people who has intelligence and motivation		yes	Intelligence, interest, and motivation
691	Turkey	yes	yes		yes	yes	male	26-35	<=35	Turkey	Turkey					Single, Never Married	Single	Single			Graduate or professional degree	Graduate or professional degree	Higher Education	Higher Education	good	2015-08-10	yes							Men
692	Turkey	yes	yes		yes	yes	male	26-35	<=35	Turkey	Turkey					Single, Never Married	Single	Single	0	PhD Studentsi	Graduate or professional degree	Graduate or professional degree	Higher Education	Higher Education	Average	2015-05-07	yes	I have not done any observation, I have not read any studies and I have not hear anything about that so I think there is no difference for now	yes	I think it is related to something but I don’t know ia m neutral		yes		Women	houseworks and childcare are multitasking	yes	because they have a lot of works so they are practicing a lot of multitasking works	yes				yes	no	no
693	Turkey	yes	no	no
694	Turkey	yes	yes
695	Turkey	yes	yes		yes	yes	male	26-35	<=35	Turkey	Turkey					Single	Single	Single		Psychological counsellor	Bachelor's degree	Bachelor's degree	Non-Higher Education	Non-Higher Education	good	2015-02-04	no	I think personality is related to multitasking rather than genders		it is strongly effectted by nature and nurture	communication and using your brain properly
696	Turkey	yes	yes		yes	yes	male	18-25	<=35	Turkey	Turkey					Single	Single	Single		Teacher	Bachelor's degree	Bachelor's degree	Non-Higher Education	Non-Higher Education	good	2015-02-04	yes							Women	because their functional intelligence capacity is greater.	no		yes				yes	no	yes	individual diffrences
697	Turkey	yes	no
698	Turkey	no	no	no
699	Turkey	yes	yes		yes	yes	female	18-25	<=35	Turkey	Turkey					Single, Never Married	Single	Single	0	Student	High school graduate (includes equivalency)	High School	Non-Higher Education	Higher Education	good	2015-02-04	yes							Women	because they can think more than one issue at a time	yes	because thay have a lot of works to do in their life	yes				yes	no	no		they can do it	yes	because when number of tasks increase the number of ideas are increase	yes
700	Turkey	yes	yes		yes	yes	female	26-35	<=35	Turkey	Turkey					Single, Never Married	Single	Single		Qur'an Teacher	Bachelor's degree	Bachelor's degree	Non-Higher Education	Non-Higher Education	good	2015-02-04	yes							Men
701	Turkey	yes	yes		yes	yes	male	18-25	<=35	Turkey	Turkey					Single, Never Married	Single	Single			High school graduate (includes equivalency)	High School	Non-Higher Education	Non-Higher Education	very good	10	yes							Men												males are more stronger, faster than females	yes		no
702	Turkey	yes	no	no
703	Turkey	yes	no
704	Turkey	no	yes		yes	yes	male	18-25	<=35							Married	Married/Partnership	Married/Partnership		Student	Bachelor's degree	Bachelor's degree	Non-Higher Education	Higher Education	Average	2015-05-07	yes							Women	because of their nature	no		yes				no	no	no
705	Turkey	yes	yes		yes	yes	male	26-35	<=35	Turkey	Turkey					Married	Married/Partnership	Married/Partnership	1	Psychological counsellor	Bachelor's degree	Bachelor's degree	Non-Higher Education	Non-Higher Education	very good	1	yes							Men												..	yes		yes
706	Turkey	yes	no	yes
707	Turkey	yes	yes		yes	yes	male	26-35	<=35	Turkey	Turkey					Single, Never Married	Single	Single		inspector	Bachelor's degree	Bachelor's degree	Non-Higher Education	Non-Higher Education	Average	2015-02-04	yes							Women	because they can think on a larger perspective and they are able to think more details.	no		no	becaue females thinking deeply and they fulfill the works with enthusiasm	no
708	Turkey	yes	yes		yes	yes	male	36-45	>35	Turkey	Turkey					Married	Married/Partnership	Married/Partnership	3	Security Officer	Graduate or professional degree	Graduate or professional degree	Higher Education	Higher Education	good	2015-02-04	yes							Men												because females have more work and responsibilities such as house works and child care etc	yes		yes
709	Turkey	yes	yes		yes	yes	male	26-35	<=35	Turkey	Turkey					Single	Single	Single			Some college, no degree	Some college, no degree	Non-Higher Education	Non-Higher Education	very good	1	yes							Women	because they are indispensable	no		no	I don’t think so	no
710	Turkey	yes	no	no
711	Turkey	yes	no	no
712	Turkey	yes	no	no
713	Turkey	yes	yes	yes	yes	yes	male	26-35	<=35	Turkey	Turkey					Single	Single	Single		Social worker(sosyal hizmet uzmanı)	Graduate or professional degree	Graduate or professional degree	Higher Education	Higher Education	good	2015-05-07	yes							Men												because they can think analitically and decisive so they can act and ecide faster	no		yes
714	Turkey	yes	no	no
715	Turkey	yes	no	no
716	Turkey	no	no
717	Turkey	yes	no	no
718	Turkey	yes	yes		yes	yes	male	18-25	<=35	Turkey	Turkey					Single, Never Married	Single	Single		Teacher	Bachelor's degree	Bachelor's degree	Non-Higher Education	Non-Higher Education	good	2015-05-07	yes							Women	because of their nature	no		yes				yes	no	no
719	Turkey	yes	yes		yes	yes	male	18-25	<=35	Turkey	Turkey					In a domestic partnership or civil union	Married/Partnership	Married/Partnership		Student	High school graduate (includes equivalency)	High School	Non-Higher Education	Higher Education	Excellent	2015-05-07	yes							Women	I think I impressed by my girl friend she can make a perfect program in her life. also, my mum is doing alot of works in a day. Both of them do a lot of multitasks	no		yes				yes	no	no
720	Turkey	yes	no	no
721	Turkey	yes	no	no
722	Turkey	no	no	no
723	Turkey	yes	no	no
724	Turkey	yes	yes		yes	yes	male	26-35	<=35	Turkey	Turkey					Single, Never Married	Single	Single			Graduate or professional degree	Graduate or professional degree	Higher Education	Higher Education	good	2015-02-04	yes							Women	inteligence	no		yes				yes	yes	no
725	Turkey	yes	yes		yes	yes	male	18-25	<=35	Turkey	Turkey					Single	Single	Single			Bachelor's degree	Bachelor's degree	Non-Higher Education	Non-Higher Education	Average	2015-08-10	yes							Men												jobs are for males and house works are for female	yes		yes
726	Turkey	yes	yes		yes	yes	male	18-25	<=35	Turkey	Turkey					Single	Single	Single		Student	Bachelor's degree	Bachelor's degree	Non-Higher Education	Higher Education	very good	2015-05-07	no	both genders can success same works	no		enthusiasm and passion
727	Turkey	yes	no	no
728	Turkey	yes	no	no
729	Turkey	yes	yes		yes	yes	male	18-25	<=35	Turkey	Turkey					Single, Never Married	Single	Single			Bachelor's degree	Bachelor's degree	Non-Higher Education	Non-Higher Education	Average	2015-02-04	yes							Women
730	Turkey	no	no	no
731	Turkey	yes	yes		yes	yes	male	36-45	>35	Turkey	Turkey					Married	Married/Partnership	Married/Partnership	2	Teacher	Bachelor's degree	Bachelor's degree	Non-Higher Education	Non-Higher Education	good	2015-02-04	yes							Men												because they are more active in social life	yes		yes
732	Turkey	yes	yes		no	yes
733	Turkey	yes	yes		yes	yes	male	36-45	>35	Turkey	Turkey					Married	Married/Partnership	Married/Partnership	4	Tekstile	Bachelor's degree	Bachelor's degree	Non-Higher Education	Non-Higher Education	very good	2015-05-07	yes							Women	their nature	no		yes				no	yes	yes	I never generilize There are always exceptionals.
734	Turkey	yes	yes		yes	yes	male	18-25	<=35	Turkey	Turkey					Single	Single	Single		Student	High school graduate (includes equivalency)	High School	Non-Higher Education	Higher Education	Excellent	2015-05-07	no	Because males are not superior than females	no		self confidence and passion
735	Turkey	no	no	no
736	Turkey	yes	yes		yes	yes	male	26-35	<=35	Turkey	Turkey					Single, Never Married	Single	Single		Student					good	2015-02-04	no	nature	yes			no
737	Turkey	yes	yes		yes	yes	male	18-25	<=35	Turkey	Turkey					Single	Single	Single			High school graduate (includes equivalency)	High School	Non-Higher Education	Non-Higher Education	Average	2015-05-07	yes							Men												because we are more intelligence	yes		yes
738	Turkey	yes	yes		yes	yes	female	26-35	<=35	Turkey	Turkey					Married	Married/Partnership	Married/Partnership	1	Teacher	Graduate or professional degree	Graduate or professional degree	Higher Education	Higher Education	good	2015-05-07	yes							Women	because of their nature, female's brain works mutitasking	yes	because males prefer to do their works one by one but females usually do more than one works in a same time. fore example they cook and talk over phone.	yes				yes	no	no
739	Turkey	yes	yes		yes	yes	female	36-45	>35	Turkey	Turkey					Single, Never Married	Single	Single		officer	Bachelor's degree	Bachelor's degree	Non-Higher Education	Non-Higher Education	good	2015-05-07	yes							Women	nature, genetic and social responsiilities	yes	because females have a lot of works to do and they learn from each other how to musltitask all these works	no	because of thei nature and they practice in this way	no
740	Turkey	yes	yes		yes	yes		36-45	>35	Turkey	Turkey					Married	Married/Partnership	Married/Partnership	2	Teacher-Administrator	Graduate or professional degree	Graduate or professional degree	Higher Education	Higher Education	good	2015-05-07	no	abilities are moreimportant on multitasking	yes	the people who created with different intellignce and abilities		yes	because their nature and abilities are suit for this works
741	Turkey	yes	yes		yes	yes	male	26-35	<=35	Turkey	Turkey					Married	Married/Partnership	Married/Partnership	2	Court Clerk	Bachelor's degree	Bachelor's degree	Non-Higher Education	Non-Higher Education	Excellent	1	no	it is related to adaptation and being familiar not genders differences	yes	some people who are specialist at multitasking		yes	I cannot explain but if somebody can deal with multitasking succesfully this means he or she is good at multitasking
742	Turkey	yes	no	no
743	Turkey	yes	yes		yes	yes	male	18-25	<=35	Turkey	Turkey					Single, Never Married	Single	Single		Student	Bachelor's degree	Bachelor's degree	Non-Higher Education	Higher Education	good	2015-02-04	yes							Women	because females are more sincere and meticulous	no		yes				yes	no	yes	females who has this ability and practice
744	Turkey	yes	yes		yes	yes	male	36-45	>35	Turkey	Turkey					Married	Married/Partnership	Married/Partnership	2		Graduate or professional degree	Graduate or professional degree	Higher Education	Higher Education	good	2015-05-07	no	it depends on abilities	yes	some people who has good ability		yes	ability
745	Turkey	yes	no	no
746	Turkey	yes	yes		yes	yes	male	18-25	<=35	Turkey	Turkey					Single	Single	Single		Student	Bachelor's degree	Bachelor's degree	Non-Higher Education	Higher Education	Very Poor	1	no	it is related to adaptation and being familiar not genders differences	yes	people who has good experinece and abilities		yes	ability	Women	becasuse they have a greater dream and thinking world	no		yes				yes	no	no
747	Turkey	yes	yes		yes	yes
748	Turkey	yes	no	no
749	Turkey	yes	yes		yes	yes	female	18-25	<=35	Turkey	Turkey					In a domestic partnership or civil union	Married/Partnership	Married/Partnership		Student	High school graduate (includes equivalency)	High School	Non-Higher Education	Higher Education	Average	1	no
750	Turkey	yes	yes		no	no
751	Turkey	yes	yes		yes	yes	male	18-25	<=35	Turkey	Turkey					Single	Single	Single	0	student	Some college, no degree	Some college, no degree	Non-Higher Education	Higher Education	Average	2015-02-04	no	I think it dependson intelligence	no		attention	no
752	Turkey	yes	yes		yes	yes	female	36-45	>35	Turkey	Turkey					Married	Married/Partnership	Married/Partnership	2	Teacher	Bachelor's degree	Bachelor's degree	Non-Higher Education	Non-Higher Education	Average	2015-02-04	yes							Women	because theycan do more than one work at same time	yes	because they have a lot of works to do in a same time	yes				yes	no	no
753	Turkey	yes	yes		yes	yes	male	26-35	<=35	Turkey	Turkey					Single, Never Married	Single	Single			PhD	PhD	Higher Education	Higher Education	Average	2015-02-04	yes							Women	because of houseworks and child care	no		yes				no	yes	yes	mothers, house wives
754	Turkey	yes	yes		yes	yes	male	26-35	<=35	Turkey	Turkey					Married	Married/Partnership	Married/Partnership	2	Teacherlik	Bachelor's degree	Bachelor's degree	Non-Higher Education	Non-Higher Education	good	2015-05-07	no	it is not related to genders differences	yes	it is depends on intelligence factor		no
755	Turkey	yes	yes		yes	yes	female	18-25	<=35	Turkey	Turkey					Single	Single	Single			Bachelor's degree	Bachelor's degree	Non-Higher Education	Non-Higher Education	Average	2015-05-07	no	themost important thing is complete the work, so both genders can do it	yes	the people who are talentful		yes	if he naturally incline to do multitasking works. I mean ability and nature
756	Turkey	yes	yes		yes	yes	male	26-35	<=35	Turkey	Turkey					Single, Never Married	Single	Single		Teacher	Bachelor's degree	Bachelor's degree	Non-Higher Education	Non-Higher Education	good	2015-05-07	no	because I see in my life, both genders able to do multitasking works	yes	It is related to their brain and attentional capacity		yes	for example a women cooks and wath an episode she can do this two works excellent. Also a carpenter can do his work and deal with customers in same time.
757	Turkey	yes	yes		yes	yes	male	26-35	<=35	Turkey	Turkey					Married	Married/Partnership	Married/Partnership	0	Teacher	Bachelor's degree	Bachelor's degree	Non-Higher Education	Non-Higher Education	Average	2015-05-07	yes							Men												because males have more responsibilities in social familiy and work life	yes		no
758	Turkey	yes	yes		no	yes
759	Turkey	yes	yes		yes	yes	female	26-35	<=35	Turkey	Turkey					Married	Married/Partnership	Married/Partnership	0	teacher	Bachelor's degree	Bachelor's degree	Non-Higher Education	Non-Higher Education	very good	2015-02-04	no	because females are also tenacious as mles	yes	the people who have a good presentation skills and social abilities should e good at multitasking		no	because they usually involve in social life so they encounter lot of multitasking in dailiy life
[truncated: 77 more columns]

## Sheet: LookUp
How far do you agree with the following being examples of multitasking?
Name	code
Strongly agree	3
Agree	2
Slightly agree	1
Neutral	0
Slightly disagree	-1
Disagree	-2
Strongly Disagree	-3
Mutlitasking in Occupations
A great deal	6
Very much	5
A lot	4
somewhat	3
little	2
Not much	1
Not at all	0
Yes/No
yes	1
no	0
Yes	1
No	0
OwnMTAbilities
Extremely bad	0
Very Poor	1
Poor	2
Average	3
Good	4
Very good	5
Excellent	6
HoursMTperDay
0	0
1	1
2015-02-04	3
2015-05-07	6
2015-08-10	9
10	10
SizeOfDiff
Very little difference	0
Little difference	1
Moderate difference	2
Big difference	3
Significant difference	4
SignOfDiff
Not relevant	0
Slightly relevant	1
Relevant	2
Very relevant	3
